# Supplementary material for: The chemistry–climate model ECHAM6.3-HAM2.3-MOZ1.0
Source: Copernicus journal article supplement (doi:10.5194/gmd-11-1695-2018), 2018-05-04
Supplement: Supplementary file 1 [file gmd-11-1695-2018-supplement.zip]

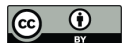

## *Supplement of*

# **The chemistry–climate model ECHAM6.3-HAM2.3-MOZ1.0**

**M. G. Schultz et al.**

*Correspondence to:* Martin G. Schultz ([m.schultz@fz-juelich.de](mailto:m.schultz@fz-juelich.de))

- [gmd-11-1695-2018-supplement-title-page.pdf](#)
- [supplement1.pdf](#)
- [supplement2.txt](#)
- [supplement3.pdf](#)

The copyright of individual parts of the supplement might differ from the CC BY 4.0 License.
