# Supplementary material for: The chemistry–climate model ECHAM6.3-HAM2.3-MOZ1.0
Source: Copernicus journal article supplement (doi:10.5194/gmd-11-1695-2018), 2018-05-04
Supplement: Supplementary file 2 [file gmd-11-1695-2018-supplement.zip]

## Supplement 1 of

Schultz et al., 2017,

“The Chemistry Climate Model ECHAM-HAMMOZ”

in Geosci. Model Dev. (2017), available at:

<http://www.geosci-model-dev.net>

Date: August 15, 2017

The supplement provides:

The Chemical Mechanism of HAMMOZ

List of Henry coefficients

# The Chemical Mechanism of ECHAM6.3-HAM2.3-MOZ1.0

JAM version: 002b

Number of reactions:

|                                                     |     |
|-----------------------------------------------------|-----|
| Tropospheric photolysis (S1):                       | 97  |
| Stratospheric photolysis (S2):                      | 45  |
| (Tropospheric) O <sub>x</sub> (S3):                 | 7   |
| (Tropospheric) HO <sub>x</sub> (S4):                | 17  |
| NO <sub>x</sub> (S5):                               | 25  |
| C1 oxidation (S6):                                  | 20  |
| C2 oxidation (S7):                                  | 48  |
| C3 oxidation (S8):                                  | 31  |
| C4 oxidation (S9):                                  | 63  |
| C5 oxidation (S10):                                 | 137 |
| C6 oxidation (S11):                                 | 31  |
| C7 oxidation (S12):                                 | 20  |
| C8 oxidation (S13):                                 | 13  |
| C10/C15 oxidation (terpenes, sesqui-terpenes; S14): | 36  |
| Tropospheric halogen + organics (S15):              | 21  |
| Sulfur (S16):                                       | 11  |
| Stratospheric O(1D) (S17):                          | 28  |
| Stratospheric inorganic halogen (S18):              | 48  |
| Stratospheric organic halogen (S19):                | 12  |
| (Tropospheric) heterogeneous (S20):                 | 7   |
| Stratospheric Sulfate aerosol (S21):                | 6   |
| Stratospheric Nitric acid dihydrate (S22):          | 5   |
| Stratospheric Ice aerosol (S23):                    | 6   |

---

|                |     |
|----------------|-----|
| All equations: | 734 |
|----------------|-----|

Table S1: Tropospheric photolysis reactions

| reaction                                                                                                                                                                                                                 | reference |
|--------------------------------------------------------------------------------------------------------------------------------------------------------------------------------------------------------------------------|-----------|
| $\text{O}_3 + h\nu \longrightarrow \text{O}_1\text{D} + \text{O}_2$                                                                                                                                                      |           |
| $\text{O}_3 + h\nu \longrightarrow \text{O} + \text{O}_2$                                                                                                                                                                |           |
| $\text{H}_2\text{O}_2 + h\nu \longrightarrow 2 \cdot \text{OH}$                                                                                                                                                          |           |
| $\text{N}_2\text{O} + h\nu \longrightarrow \text{N}_2 + \text{O}_1\text{D}$                                                                                                                                              |           |
| $\text{NO} + h\nu \longrightarrow \text{N} + \text{O}$                                                                                                                                                                   |           |
| $\text{NO}_2 + h\nu \longrightarrow \text{NO} + \text{O}$                                                                                                                                                                |           |
| $\text{NO}_3 + h\nu \longrightarrow \text{NO}_2 + \text{O}$                                                                                                                                                              |           |
| $\text{NO}_3 + h\nu \longrightarrow \text{NO} + \text{O}_2$                                                                                                                                                              |           |
| $\text{HNO}_3 + h\nu \longrightarrow \text{NO}_2 + \text{OH}$                                                                                                                                                            |           |
| $\text{HONO} + h\nu \longrightarrow \text{NO} + \text{OH}$                                                                                                                                                               |           |
| $\text{HO}_2\text{NO}_2 + h\nu \longrightarrow \text{NO}_3 + \text{OH}$                                                                                                                                                  |           |
| $\text{HO}_2\text{NO}_2 + h\nu \longrightarrow \text{HO}_2 + \text{NO}_2$                                                                                                                                                |           |
| $\text{N}_2\text{O}_5 + h\nu \longrightarrow \text{NO}_2 + \text{NO}_3$                                                                                                                                                  |           |
| $\text{N}_2\text{O}_5 + h\nu \longrightarrow \text{NO} + \text{O} + \text{NO}_3$                                                                                                                                         |           |
| $\text{CO}_2 + h\nu \longrightarrow \text{CO} + \text{O}$                                                                                                                                                                |           |
| $\text{CH}_4 + h\nu \longrightarrow \text{CH}_3\text{O}_2 + \text{H}$                                                                                                                                                    |           |
| $\text{CH}_4 + h\nu \longrightarrow 1.44 \cdot \text{H}_2 + 0.18 \cdot \text{CH}_2\text{O} + 0.18 \cdot \text{O} + 0.66 \cdot \text{OH} + 0.44 \cdot \text{CO}_2 + 0.38 \cdot \text{CO} + 0.05 \cdot \text{H}_2\text{O}$ |           |
| $\text{CH}_2\text{O} + h\nu \longrightarrow \text{CO} + 2 \cdot \text{H}$                                                                                                                                                |           |
| $\text{CH}_2\text{O} + h\nu \longrightarrow \text{CO} + \text{H}_2$                                                                                                                                                      |           |
| $\text{CH}_3\text{OOH} + h\nu \longrightarrow \text{CH}_2\text{O} + \text{H} + \text{OH}$                                                                                                                                |           |
| $\text{CH}_3\text{O}_2\text{NO}_2 + h\nu \longrightarrow \text{HO}_2 + \text{NO}_3 + \text{HCHO}$                                                                                                                        |           |
| $\text{CH}_3\text{O}_2\text{NO}_2 + h\nu \longrightarrow \text{CH}_3\text{O}_2 + \text{NO}_2$                                                                                                                            |           |
| $\text{CH}_3\text{CHO} + h\nu \longrightarrow \text{CH}_3\text{O}_2 + \text{CO} + \text{HO}_2$                                                                                                                           |           |
| $\text{CH}_3\text{COOOH} + h\nu \longrightarrow \text{CH}_3\text{O}_2 + \text{OH} + \text{CO}_2$                                                                                                                         |           |
| $\text{C}_2\text{H}_5\text{OOH} + h\nu \longrightarrow \text{CH}_3\text{CHO} + \text{HO}_2 + \text{OH}$                                                                                                                  |           |
| $\text{PAN} + h\nu \longrightarrow 0.6 \cdot \text{CH}_3\text{CO}_3 + 0.6 \cdot \text{NO}_2 + 0.4 \cdot \text{CH}_3\text{O}_2 + 0.4 \cdot \text{NO}_3 + 0.4 \cdot \text{CO}_2$                                           |           |
| $\text{EOOH} + h\nu \longrightarrow \text{EO} + \text{OH}$                                                                                                                                                               |           |
| $\text{GLYOXAL} + h\nu \longrightarrow 2 \cdot \text{CO} + 2 \cdot \text{HO}_2$                                                                                                                                          |           |
| $\text{GLYALD} + h\nu \longrightarrow 2 \cdot \text{HO}_2 + \text{CO} + \text{CH}_2\text{O}$                                                                                                                             |           |
| $\text{HOCH}_2\text{CO}_3\text{H} + h\nu \longrightarrow \text{CH}_2\text{O} + \text{HO}_2 + \text{OH} + \text{CO}_2$                                                                                                    |           |
| $\text{HCOCO}_2\text{H} + h\nu \longrightarrow 2 \cdot \text{HO}_2 + \text{CO} + \text{CO}_2$                                                                                                                            |           |
| $\text{HCOCO}_3\text{H} + h\nu \longrightarrow \text{CO} + \text{HO}_2 + \text{OH} + \text{CO}_2$                                                                                                                        |           |
| $\text{CH}_3\text{COCH}_3 + h\nu \longrightarrow \text{CH}_3\text{CO}_3 + \text{CH}_3\text{O}_2$                                                                                                                         |           |

Table S1: Tropospheric photolysis reactions (... continued)

| reaction                                                                                                                                                                                                     | reference                                                                                                                                                                          |
|--------------------------------------------------------------------------------------------------------------------------------------------------------------------------------------------------------------|------------------------------------------------------------------------------------------------------------------------------------------------------------------------------------|
| $\text{C}_3\text{H}_7\text{OOH} + h\nu \longrightarrow 0.82 \cdot \text{CH}_3\text{COCH}_3 + \text{OH} + \text{HO}_2 + 0.27 \cdot \text{CH}_3\text{CHO}$                                                     |                                                                                                                                                                                    |
| $\text{POOH} + h\nu \longrightarrow \text{CH}_2\text{O} + \text{CH}_3\text{CHO} + \text{HO}_2 + \text{OH}$                                                                                                   |                                                                                                                                                                                    |
| $\text{HYAC} + h\nu \longrightarrow \text{CH}_3\text{CO}_3 + \text{HO}_2 + \text{CH}_2\text{O}$                                                                                                              |                                                                                                                                                                                    |
| $\text{CH}_3\text{COCHO} + h\nu \longrightarrow \text{CH}_3\text{CO}_3 + \text{CO} + \text{HO}_2$                                                                                                            |                                                                                                                                                                                    |
| $\text{ROOH} + h\nu \longrightarrow \text{CH}_2\text{O} + \text{CH}_3\text{CO}_3 + \text{OH}$                                                                                                                |                                                                                                                                                                                    |
| $\text{PR}_2\text{O}_2\text{HNO}_3 + h\nu \longrightarrow 0.83 \cdot \text{HO}_2 + 0.83 \cdot \text{NOA} + 0.17 \cdot \text{CH}_2\text{O} + 0.17 \cdot \text{CH}_3\text{CHO} + \text{OH}$                    |                                                                                                                                                                                    |
| $\text{NOA} + h\nu \longrightarrow \text{CH}_2\text{O} + \text{CH}_3\text{CO}_3 + \text{NO}_2$                                                                                                               | Müller et al. (2014)                                                                                                                                                               |
| $\text{MEK} + h\nu \longrightarrow \text{C}_2\text{H}_5\text{O}_2 + \text{CH}_3\text{CO}_3$                                                                                                                  |                                                                                                                                                                                    |
| $\text{MEKOOH} + h\nu \longrightarrow \text{CH}_3\text{CO}_3 + \text{OH} + \text{CH}_3\text{CHO}$                                                                                                            |                                                                                                                                                                                    |
| $\text{MEKNO}_3 + h\nu \longrightarrow \text{CH}_3\text{CHO} + \text{CH}_3\text{CO}_3 + \text{NO}_2$                                                                                                         | Müller et al. (2014)                                                                                                                                                               |
| $\text{MACR} + h\nu \longrightarrow \text{HO}_2 + 0.5 \cdot \text{MCO}_3 + 0.5 \cdot \text{CH}_2\text{O} + 0.5 \cdot \text{CH}_3\text{CO}_3 + 0.5 \cdot \text{CO}$                                           |                                                                                                                                                                                    |
| $\text{MACR} + h\nu \longrightarrow \text{HO}_2 + 0.5 \cdot \text{MCO}_3 + 0.5 \cdot \text{CH}_2\text{O} + 0.5 \cdot \text{CH}_3\text{CO}_3 + 0.5 \cdot \text{CO}$                                           |                                                                                                                                                                                    |
| $\text{MACROOH} + h\nu \longrightarrow \text{HO}_2 + \text{HYAC} + \text{OH} + \text{CO}$                                                                                                                    |                                                                                                                                                                                    |
| $\text{MACROH} + h\nu \longrightarrow \text{CO} + \text{HYAC} + 2 \cdot \text{HO}_2 + \text{H}_2\text{O}$                                                                                                    |                                                                                                                                                                                    |
| $\text{MPAN} + h\nu \longrightarrow \text{MCO}_3 + \text{NO}_2$                                                                                                                                              |                                                                                                                                                                                    |
| $\text{MACO}_3\text{H} + h\nu \longrightarrow \text{CH}_2\text{O} + \text{CH}_3\text{CO}_3 + \text{OH} + \text{CO}_2$                                                                                        |                                                                                                                                                                                    |
| $\text{MVK} + h\nu \longrightarrow 0.5 \cdot \text{C}_3\text{H}_6 + 0.5 \cdot \text{CH}_3\text{CO}_3 + 0.5 \cdot \text{CH}_2\text{O} + \text{CO} + 0.5 \cdot \text{HO}_2$                                    |                                                                                                                                                                                    |
| $\text{LHMKABOOH} + h\nu \longrightarrow 0.3 \cdot \text{CH}_3\text{COCHO} + \text{OH} + 0.3 \cdot \text{CH}_2\text{O} + 0.3 \cdot \text{HO}_2 + 0.7 \cdot \text{CH}_3\text{CO}_3 + 0.7 \cdot \text{GLYALD}$ |                                                                                                                                                                                    |
| $\text{MVKN} + h\nu \longrightarrow \text{CH}_3\text{CO}_3 + \text{GLYALD} + \text{NO}_2$                                                                                                                    | Müller et al. (2014)                                                                                                                                                               |
| $\text{MACRN} + h\nu \longrightarrow \text{CO} + \text{HYAC} + \text{HO}_2 + \text{NO}_2$                                                                                                                    | Müller et al. (2014)                                                                                                                                                               |
| $\text{CO}_2\text{H}_3\text{CHO} + h\nu \longrightarrow \text{CH}_3\text{COCHO} + \text{CO} + 2 \cdot \text{HO}_2$                                                                                           |                                                                                                                                                                                    |
| $\text{CO}_2\text{H}_3\text{CO}_3\text{H} + h\nu \longrightarrow \text{CH}_3\text{COCHO} + \text{HO}_2 + \text{OH} + \text{CO}_2$                                                                            |                                                                                                                                                                                    |
| $\text{BIACETOH} + h\nu \longrightarrow \text{CH}_3\text{CO}_3 + \text{HOCH}_2\text{CO}_3$                                                                                                                   |                                                                                                                                                                                    |
| $\text{ALKOOH} + h\nu \longrightarrow 0.4 \cdot \text{CH}_3\text{CHO} + 0.25 \cdot \text{CH}_2\text{O} + 0.25 \cdot \text{CH}_3\text{COCH}_3 + \text{HO}_2 + 0.8 \cdot \text{MEK} + \text{OH}$               |                                                                                                                                                                                    |
| $\text{ALKNO}_3 + h\nu \longrightarrow 0.4 \cdot \text{CH}_3\text{CHO} + 0.25 \cdot \text{CH}_2\text{O} + 0.25 \cdot \text{CH}_3\text{COCH}_3 + \text{HO}_2 + 0.8 \cdot \text{MEK} + \text{NO}_2$            |                                                                                                                                                                                    |
| $\text{LISOPACOOH} + h\nu \longrightarrow \text{HO}_2 + \text{LHC}_4\text{ACCHO} + \text{OH}$                                                                                                                |                                                                                                                                                                                    |
| $\text{LISOPACNO}_3 + h\nu \longrightarrow \text{HO}_2 + \text{LHC}_4\text{ACCHO} + \text{NO}_2$                                                                                                             |                                                                                                                                                                                    |
| $\text{HPALD} + h\nu \longrightarrow \text{LHC}_4\text{ACCO}_3 + \text{OH}$                                                                                                                                  | D. Taraborrelli: $J(\text{MACR})/\phi(\text{MACR}) = 2 \cdot j_{\text{macr\_a}}/0.004 = 500 \cdot j_{\text{macr\_a}}$                                                              |
| $\text{PACALD} + h\nu \longrightarrow \text{OH} + 0.5 \cdot \text{HO}_2 + 0.5 \cdot \text{CO} + 0.5 \cdot \text{CH}_3\text{COCHO} + 0.5 \cdot \text{GLYOX} + 0.5 \cdot \text{CH}_3\text{CO}_3$               | D. Taraborrelli: average of product yields of C5PACALD 1 and 2 in MCMv3.3.1, $2 \cdot J(\text{MACR})/\phi(\text{MACR}) = 2 \cdot j_{\text{hpald}} = 1000 \cdot j_{\text{macr\_a}}$ |

Table S1: Tropospheric photolysis reactions (... continued)

| reaction                                                                                                                                                                                                                                                                                                     | reference            |
|--------------------------------------------------------------------------------------------------------------------------------------------------------------------------------------------------------------------------------------------------------------------------------------------------------------|----------------------|
| $\text{LIECHO} + h\nu \longrightarrow \text{CO} + \text{HO}_2 + 0.6 \cdot \text{LHMKABO}_2 + 0.4 \cdot \text{MACRO}_2$                                                                                                                                                                                       |                      |
| $\text{LIECO}_3\text{H} + h\nu \longrightarrow 0.6 \cdot \text{LHMKABO}_2 + 0.4 \cdot \text{MACRO}_2 + \text{CO}_2 + \text{OH}$                                                                                                                                                                              |                      |
| $\text{ISOPBOOH} + h\nu \longrightarrow \text{CH}_2\text{O} + \text{MVK} + \text{HO}_2 + \text{OH}$                                                                                                                                                                                                          |                      |
| $\text{ISOPBNO}_3 + h\nu \longrightarrow \text{CH}_2\text{O} + \text{MVK} + \text{HO}_2 + \text{NO}_2$                                                                                                                                                                                                       |                      |
| $\text{ISOPDOOH} + h\nu \longrightarrow \text{CH}_2\text{O} + \text{MACR} + \text{HO}_2 + \text{OH}$                                                                                                                                                                                                         |                      |
| $\text{ISOPDNO}_3 + h\nu \longrightarrow \text{CH}_2\text{O} + \text{MACR} + \text{HO}_2 + \text{NO}_2$                                                                                                                                                                                                      |                      |
| $\text{NISOPOOH} + h\nu \longrightarrow \text{HO}_2 + \text{NC}_4\text{CHO} + \text{OH}$                                                                                                                                                                                                                     |                      |
| $\text{NC}_4\text{CHO} + h\nu \longrightarrow \text{LHC}_4\text{ACCO}_3 + \text{NO}_2$                                                                                                                                                                                                                       | Müller et al. (2014) |
| $\text{LNISOOH} + h\nu \longrightarrow \text{NOA} + \text{OH} + 0.5 \cdot \text{GLYOXAL} + 0.5 \cdot \text{CO} + \text{HO}_2 + 0.5 \cdot \text{CO}_2$                                                                                                                                                        |                      |
| $\text{LHC}_4\text{ACCHO} + h\nu \longrightarrow 0.5 \cdot \text{LHC}_4\text{ACCO}_3 + 0.25 \cdot \text{HYAC} + 0.25 \cdot \text{GLYALD} + 0.25 \cdot \text{CH}_3\text{CO}_3 + 0.75 \cdot \text{CO} + 1.25 \cdot \text{HO}_2$                                                                                |                      |
| $\text{LC}_{578}\text{OOH} + h\nu \longrightarrow 0.5 \cdot \text{HYAC} + 0.5 \cdot \text{CH}_3\text{COCHO} + 0.5 \cdot \text{GLYOXAL} + 0.5 \cdot \text{GLYALD} + \text{HO}_2 + \text{OH}$                                                                                                                  |                      |
| $\text{LHC}_4\text{ACCO}_3\text{H} + h\nu \longrightarrow 0.5 \cdot \text{HYAC} + 0.5 \cdot \text{GLYALD} + 0.5 \cdot \text{CH}_3\text{CO}_3 + 0.5 \cdot \text{CO} + 0.5 \cdot \text{HO}_2 + \text{OH} + \text{CO}_2$                                                                                        |                      |
| $\text{HCOC}_5 + h\nu \longrightarrow \text{CH}_2\text{O} + \text{CH}_3\text{CO}_3 + \text{HOCH}_2\text{CO}_3$                                                                                                                                                                                               |                      |
| $\text{C}_{59}\text{OOH} + h\nu \longrightarrow \text{HOCH}_2\text{CO}_3 + \text{HYAC} + \text{NO}_2 + \text{OH}$                                                                                                                                                                                            |                      |
| $\text{LISOPOOHOOH} + h\nu \longrightarrow 0.25 \cdot \text{CH}_3\text{COCHO} + 0.25 \cdot \text{GLYALD} + 0.25 \cdot \text{GLYOXAL} + 0.25 \cdot \text{HYAC} + 0.25 \cdot \text{CO} + 0.25 \cdot \text{MACROH} + 0.25 \cdot \text{CH}_2\text{O} + 0.25 \cdot \text{CO}_2\text{H}_3\text{CHO} + \text{HO}_2$ |                      |
| $\text{LISOPNO}_3\text{OOH} + h\nu \longrightarrow \text{HOCH}_2\text{CO}_3 + \text{HYAC} + \text{NO}_2 + \text{OH}$                                                                                                                                                                                         |                      |
| $\text{LISOPNO}_3\text{NO}_3 + h\nu \longrightarrow \text{HOCH}_2\text{CO}_3 + \text{HYAC} + \text{NO}_2 + \text{NO}_2$                                                                                                                                                                                      |                      |
| $\text{MBOOH} + h\nu \longrightarrow \text{HO}_2 + \text{OH} + 0.67 \cdot \text{GLYALD} + 0.67 \cdot \text{CH}_3\text{COCH}_3 + 0.33 \cdot \text{IBUTALOH} + 0.33 \cdot \text{CH}_2\text{O}$                                                                                                                 |                      |
| $\text{IBUTALOH} + h\nu \longrightarrow 2 \cdot \text{HO}_2 + \text{CO} + \text{CH}_3\text{COCH}_3$                                                                                                                                                                                                          |                      |
| $\text{IBUTALOOH} + h\nu \longrightarrow \text{CH}_3\text{COCH}_3 + \text{OH} + \text{CO}_2 + \text{HO}_2$                                                                                                                                                                                                   |                      |
| $\text{BEPOMUC} + h\nu \longrightarrow \text{BIGALD}_1 + 1.5 \cdot \text{HO}_2 + 1.5 \cdot \text{CO}$                                                                                                                                                                                                        |                      |
| $\text{BIGALD}_1 + h\nu \longrightarrow 0.6 \cdot \text{MALO}_2 + \text{HO}_2$                                                                                                                                                                                                                               |                      |
| $\text{TOLOOH} + h\nu \longrightarrow \text{OH} + 0.6 \cdot \text{GLYOXAL} + 0.4 \cdot \text{CH}_3\text{COCHO} + \text{HO}_2 + 0.2 \cdot \text{BIGALD}_1 + 0.2 \cdot \text{BIGALD}_2 + 0.2 \cdot \text{BIGALD}_3$                                                                                            |                      |
| $\text{TEPOMUC} + h\nu \longrightarrow 0.5 \cdot \text{CH}_3\text{CO}_3 + \text{HO}_2 + 1.5 \cdot \text{CO}$                                                                                                                                                                                                 |                      |
| $\text{CATEC}_1\text{OOH} + h\nu \longrightarrow \text{CATEC}_1\text{O} + \text{OH}$                                                                                                                                                                                                                         |                      |
| $\text{BIGALD}_2 + h\nu \longrightarrow 0.6 \cdot \text{DICARBO}_2 + 0.6 \cdot \text{HO}_2$                                                                                                                                                                                                                  |                      |
| $\text{BIGALD}_3 + h\nu \longrightarrow 0.6 \cdot \text{CO} + 0.6 \cdot \text{HO}_2 + 0.6 \cdot \text{MDIALO}_2$                                                                                                                                                                                             |                      |
| $\text{BIGALD}_4 + h\nu \longrightarrow \text{CO} + \text{HO}_2 + \text{CH}_3\text{COCHO} + \text{CH}_3\text{CO}_3$                                                                                                                                                                                          |                      |
| $\text{TERPOOH} + h\nu \longrightarrow 0.4 \cdot \text{CH}_2\text{O} + 0.05 \cdot \text{CH}_3\text{COCH}_3 + 0.945 \cdot \text{TERPROD}_1 + \text{HO}_2 + \text{OH}$                                                                                                                                         |                      |

Table S1: Tropospheric photolysis reactions (... continued)

| reaction                                                                                                                                                                                | reference |
|-----------------------------------------------------------------------------------------------------------------------------------------------------------------------------------------|-----------|
| $\text{TERPROD}_1 + h\nu \longrightarrow \text{CO} + \text{HO}_2 + \text{TERPROD}_2$                                                                                                    |           |
| $\text{TERP}_2\text{OOH} + h\nu \longrightarrow \text{OH} + 0.372 \cdot \text{CH}_2\text{O} + 0.3 \cdot \text{CH}_3\text{COCH}_3 + 0.25 \cdot \text{CO} + \text{CO}_2 +$                |           |
| $\text{TERPROD}_2 + \text{HO}_2 + 0.25 \cdot \text{GLYALD}$                                                                                                                             |           |
| $\text{TERPROD}_2 + h\nu \longrightarrow 0.15 \cdot \text{CH}_3\text{COCH}_2\text{O}_2 + 0.68 \cdot \text{CH}_2\text{O} + 0.8 \cdot \text{CO}_2 + 0.5 \cdot \text{CH}_3\text{COCH}_3 +$ |           |
| $1.2 \cdot \text{HO}_2 + 1.7 \cdot \text{CO}$                                                                                                                                           |           |
| $\text{ISOPBNO}_3 + h\nu \longrightarrow \text{HO}_2 + \text{NO}_2 + \text{TERPROD}_1$                                                                                                  |           |
| $\text{NTERPNO}_3 + h\nu \longrightarrow \text{NO}_2 + \text{OH} + \text{TERPROD}_1$                                                                                                    |           |
| $\text{ELVOC} + h\nu \longrightarrow \text{HO}_2 + \text{OH} + \text{TERPROD}_2$                                                                                                        |           |

Table S2: Stratospheric photolysis reactions

| reaction                                                                    | reference                                                                                                            |
|-----------------------------------------------------------------------------|----------------------------------------------------------------------------------------------------------------------|
| $\text{O}_2 + h\nu \longrightarrow \text{O} + \text{O}_1\text{D}$           |                                                                                                                      |
| $\text{O}_2 + h\nu \longrightarrow 2 \cdot \text{O}$                        |                                                                                                                      |
| $\text{H}_2\text{O} + h\nu \longrightarrow \text{H} + \text{OH}$            |                                                                                                                      |
| $\text{H}_2\text{O} + h\nu \longrightarrow \text{H}_2 + \text{O}_1\text{D}$ |                                                                                                                      |
| $\text{H}_2\text{O} + h\nu \longrightarrow 2 \cdot \text{H} + \text{O}$     |                                                                                                                      |
| $\text{CL}_2 + h\nu \longrightarrow 2 \cdot \text{CL}$                      |                                                                                                                      |
| $\text{CL}_2\text{O}_2 + h\nu \longrightarrow 2 \cdot \text{CL}$            |                                                                                                                      |
| $\text{CLO} + h\nu \longrightarrow \text{CL} + \text{O}$                    |                                                                                                                      |
| $\text{HCL} + h\nu \longrightarrow \text{CL} + \text{H}$                    |                                                                                                                      |
| $\text{HOCL} + h\nu \longrightarrow \text{CL} + \text{OH}$                  |                                                                                                                      |
| $\text{CLONO}_2 + h\nu \longrightarrow \text{CL} + \text{NO}_3$             |                                                                                                                      |
| $\text{CLONO}_2 + h\nu \longrightarrow \text{CLO} + \text{NO}_2$            |                                                                                                                      |
| $\text{OCLO} + h\nu \longrightarrow \text{CLO} + \text{O}$                  |                                                                                                                      |
| $\text{BRO} + h\nu \longrightarrow \text{BR} + \text{O}$                    |                                                                                                                      |
| $\text{HBR} + h\nu \longrightarrow \text{BR} + \text{H}$                    |                                                                                                                      |
| $\text{HOBR} + h\nu \longrightarrow \text{BR} + \text{OH}$                  |                                                                                                                      |
| $\text{BRONO} + h\nu \longrightarrow \text{BR} + \text{NO}_2$               | 50% branching ratio assigned to both possible channels. Cross-sections consistent with Burkholder and Orlando (2000) |
| $\text{BRONO} + h\nu \longrightarrow \text{BRO} + \text{NO}$                | 50% branching ratio assigned to both possible channels. Cross-sections consistent with Burkholder and Orlando (2000) |
| $\text{BRNO}_2 + h\nu \longrightarrow \text{BR} + \text{NO}_2$              |                                                                                                                      |
| $\text{BRONO}_2 + h\nu \longrightarrow \text{BR} + \text{NO}_3$             |                                                                                                                      |

Table S2: Stratospheric photolysis reactions (... continued)

| reaction                                                                                         | reference |
|--------------------------------------------------------------------------------------------------|-----------|
| $\text{BRONO}_2 + \text{h}\nu \longrightarrow \text{BRO} + \text{NO}_2$                          |           |
| $\text{BR}_2 + \text{h}\nu \longrightarrow 2 \cdot \text{BR}$                                    |           |
| $\text{BRCL} + \text{h}\nu \longrightarrow \text{BR} + \text{CL}$                                |           |
| $\text{HF} + \text{h}\nu \longrightarrow \text{F} + \text{H}$                                    |           |
| $\text{SF}_6 + \text{h}\nu \longrightarrow$                                                      |           |
| $\text{CH}_3\text{BR} + \text{h}\nu \longrightarrow \text{BR} + \text{CH}_3\text{O}_2$           |           |
| $\text{CH}_2\text{BR}_2 + \text{h}\nu \longrightarrow 2 \cdot \text{BR}$                         |           |
| $\text{CHBR}_3 + \text{h}\nu \longrightarrow 3 \cdot \text{BR}$                                  |           |
| $\text{CH}_3\text{CL} + \text{h}\nu \longrightarrow \text{CH}_3\text{O}_2 + \text{CL}$           |           |
| $\text{CH}_3\text{CCL}_3 + \text{h}\nu \longrightarrow 3 \cdot \text{CL}$                        |           |
| $\text{CF}_3\text{BR} + \text{h}\nu \longrightarrow \text{BR} + \text{F} + \text{COF}_2$         |           |
| $\text{CF}_2\text{CLBR} + \text{h}\nu \longrightarrow \text{BR} + \text{CL} + \text{COF}_2$      |           |
| $\text{CCL}_4 + \text{h}\nu \longrightarrow 4 \cdot \text{CL} + \text{CO}_2$                     |           |
| $\text{CFC}_{11} + \text{h}\nu \longrightarrow 2 \cdot \text{CL} + \text{COFCL}$                 |           |
| $\text{CFC}_{12} + \text{h}\nu \longrightarrow 2 \cdot \text{CL} + \text{COF}_2$                 |           |
| $\text{CFC}_{113} + \text{h}\nu \longrightarrow 2 \cdot \text{CL} + \text{COFCL} + \text{COF}_2$ |           |
| $\text{CFC}_{114} + \text{h}\nu \longrightarrow 2 \cdot \text{CL} + 2 \cdot \text{COF}_2$        |           |
| $\text{CFC}_{115} + \text{h}\nu \longrightarrow \text{CL} + \text{F} + 2 \cdot \text{COF}_2$     |           |
| $\text{HCFC}_{22} + \text{h}\nu \longrightarrow \text{CL} + \text{COF}_2$                        |           |
| $\text{HCFC}_{141}\text{B} + \text{h}\nu \longrightarrow \text{CL} + \text{COFCL}$               |           |
| $\text{HCFC}_{142}\text{B} + \text{h}\nu \longrightarrow \text{CL} + \text{COF}_2$               |           |
| $\text{H}_{1202} + \text{h}\nu \longrightarrow 2 \cdot \text{BR} + \text{COF}_2$                 |           |
| $\text{H}_{2402} + \text{h}\nu \longrightarrow 2 \cdot \text{BR} + 2 \cdot \text{COF}_2$         |           |
| $\text{COF}_2 + \text{h}\nu \longrightarrow 2 \cdot \text{F}$                                    |           |
| $\text{COFCL} + \text{h}\nu \longrightarrow \text{CL} + \text{F}$                                |           |

Table S3: (Tropospheric) O<sub>x</sub> reactions

| reaction                                                                 | rate coefficient                      | reference         |
|--------------------------------------------------------------------------|---------------------------------------|-------------------|
| $\text{O} + \text{O}_2 + \text{M} \longrightarrow \text{M} + \text{O}_3$ | $\text{O}_{\text{O}_2}$               |                   |
| $\text{O} + \text{O}_3 \longrightarrow 2 \cdot \text{O}_2$               | $8.000 \cdot 10^{-12} \exp(-2060./T)$ | JPL (2011)        |
| $\text{O} + \text{O} + \text{M} \longrightarrow \text{M} + \text{O}_2$   | $\text{O}_{\text{O}}$                 | not in JPL (2011) |
| $\text{O}_1\text{D} + \text{N}_2 \longrightarrow \text{N}_2 + \text{O}$  | $2.150 \cdot 10^{-11} \exp(110./T)$   |                   |
| $\text{O}_1\text{D} + \text{O}_2 \longrightarrow \text{O} + \text{O}_2$  | $3.135 \cdot 10^{-11} \exp(55./T)$    |                   |

Table S3: (Tropospheric) O<sub>x</sub> reactions (... continued)

| reaction                                                                    | rate coefficient                   | reference  |
|-----------------------------------------------------------------------------|------------------------------------|------------|
| $\text{O}_1\text{D} + \text{O}_2 \longrightarrow \text{O} + \text{O}_2$     | $1.650 \cdot 10^{-12} \exp(55./T)$ |            |
| $\text{O}_1\text{D} + \text{H}_2\text{O} \longrightarrow 2 \cdot \text{OH}$ | $1.630 \cdot 10^{-10} \exp(60./T)$ | JPL (2011) |

Table S4: (Tropospheric) HO<sub>x</sub> reactions

| reaction                                                                            | rate coefficient                                                              | reference    |
|-------------------------------------------------------------------------------------|-------------------------------------------------------------------------------|--------------|
| $\text{H} + \text{O}_2 + \text{M} \longrightarrow \text{HO}_2 + \text{M}$           | <i>ktroe</i> ( $4.400 \cdot 10^{-32}, 1.3, 7.500 \cdot 10^{-11}, -0.2, 0.6$ ) | JPL (2011)   |
| $\text{H} + \text{O}_3 \longrightarrow \text{O}_2 + \text{OH}$                      | $1.400 \cdot 10^{-10} \exp(-470./T)$                                          | JPL (2011)   |
| $\text{H} + \text{HO}_2 \longrightarrow 2 \cdot \text{OH}$                          | $7.200 \cdot 10^{-11}$                                                        | JPL (2011)   |
| $\text{H} + \text{HO}_2 \longrightarrow \text{H}_2\text{O} + \text{O}$              | $1.600 \cdot 10^{-12}$                                                        | JPL (2011)   |
| $\text{H} + \text{HO}_2 \longrightarrow \text{H}_2 + \text{O}_2$                    | $6.900 \cdot 10^{-12}$                                                        | JPL (2011)   |
| $\text{H}_2 + \text{O} \longrightarrow \text{H} + \text{OH}$                        | $1.600 \cdot 10^{-11} \exp(-4570./T)$                                         |              |
| $\text{H}_2 + \text{OH} \longrightarrow \text{H} + \text{H}_2\text{O}$              | $2.800 \cdot 10^{-12} \exp(-1800./T)$                                         | JPL (2011)   |
| $\text{OH} + \text{O} \longrightarrow \text{H} + \text{O}_2$                        | $1.800 \cdot 10^{-11} \exp(180./T)$                                           | JPL (2011)   |
| $\text{OH} + \text{OH} \longrightarrow \text{H}_2\text{O} + \text{O}$               | $1.800 \cdot 10^{-12}$                                                        | JPL (2011)   |
| $\text{OH} + \text{OH} + \text{M} \longrightarrow \text{H}_2\text{O}_2 + \text{M}$  | <i>ktroe</i> ( $6.900 \cdot 10^{-31}, 1., 2.600 \cdot 10^{-11}, 0., 0.6$ )    | JPL (2011)   |
| $\text{OH} + \text{O}_3 \longrightarrow \text{HO}_2 + \text{O}_2$                   | $1.700 \cdot 10^{-12} \exp(-940./T)$                                          | JPL (2011)   |
| $\text{HO}_2 + \text{O} \longrightarrow \text{O}_2 + \text{OH}$                     | $3.000 \cdot 10^{-11} \exp(200./T)$                                           | JPL (2011)   |
| $\text{HO}_2 + \text{OH} \longrightarrow \text{H}_2\text{O} + \text{O}_2$           | $4.800 \cdot 10^{-11} \exp(250./T)$                                           | JPL (2011)   |
| $\text{HO}_2 + \text{O}_3 \longrightarrow \text{OH} + 2 \cdot \text{O}_2$           |                                                                               | IUPAC (2004) |
| $\text{HO}_2 + \text{HO}_2 \longrightarrow \text{H}_2\text{O}_2 + \text{O}_2$       | HO <sub>2</sub> –HO <sub>2</sub>                                              |              |
| $\text{H}_2\text{O}_2 + \text{O} \longrightarrow \text{HO}_2 + \text{OH}$           | $1.400 \cdot 10^{-12} \exp(-2000./T)$                                         | JPL (2011)   |
| $\text{H}_2\text{O}_2 + \text{OH} \longrightarrow \text{H}_2\text{O} + \text{HO}_2$ | $1.800 \cdot 10^{-12}$                                                        | JPL (2011)   |

Table S5: NO<sub>x</sub> reactions

| reaction                                                                                                                                                         | rate coefficient                                                            | reference                         |
|------------------------------------------------------------------------------------------------------------------------------------------------------------------|-----------------------------------------------------------------------------|-----------------------------------|
| $\text{N} + \text{OH} \longrightarrow \text{H} + \text{NO}$                                                                                                      | $5.000 \cdot 10^{-11}$                                                      |                                   |
| $\text{N} + \text{O}_2 \longrightarrow \text{NO} + \text{O}$                                                                                                     | $1.500 \cdot 10^{-11} \exp(-3600./T)$                                       | JPL (2011)                        |
| $\text{N} + \text{NO} \longrightarrow \text{N}_2 + \text{O}$                                                                                                     | $2.100 \cdot 10^{-11} \exp(100./T)$                                         | JPL (2011)                        |
| $\text{N} + \text{NO}_2 \longrightarrow 0.5 \cdot \text{N}_2\text{O} + 0.5 \cdot \text{O} + 0.5 \cdot \text{NO} + 0.25 \cdot \text{N}_2 + 0.25 \cdot \text{O}_2$ | $5.800 \cdot 10^{-12} \exp(220./T)$                                         | JPL (2011), products: D. Kinnison |
| $\text{NO} + \text{O} + \text{M} \longrightarrow \text{M} + \text{NO}_2$                                                                                         | <i>ktroe</i> ( $9.000 \cdot 10^{-32}, 1.5, 3.000 \cdot 10^{-11}, 0., 0.6$ ) | JPL (2011)                        |
| $\text{NO} + \text{O}_3 \longrightarrow \text{NO}_2 + \text{O}_2$                                                                                                | $3.000 \cdot 10^{-12} \exp(-1500./T)$                                       | JPL (2011)                        |



Table S5: NOx reactions (... continued)

| reaction                                                                                           | rate coefficient                                                   | reference                                                                                                                                |
|----------------------------------------------------------------------------------------------------|--------------------------------------------------------------------|------------------------------------------------------------------------------------------------------------------------------------------|
| $\text{NO} + \text{HO}_2 \longrightarrow \text{NO}_2 + \text{OH}$                                  | $3.300 \cdot 10^{-12} \exp(270./T)$                                | JPL (2011)                                                                                                                               |
| $\text{NO}_2 + \text{O} \longrightarrow \text{NO} + \text{O}_2$                                    | $5.100 \cdot 10^{-12} \exp(210./T)$                                | JPL (2011)                                                                                                                               |
| $\text{NO}_2 + \text{O} + \text{M} \longrightarrow \text{M} + \text{NO}_3$                         | $ktroe(2.500 \cdot 10^{-31}, 1.8, 2.200 \cdot 10^{-11}, 0.7, 0.6)$ | JPL (2011)                                                                                                                               |
| $\text{NO}_2 + \text{O}_3 \longrightarrow \text{NO}_3 + \text{O}_2$                                | $1.200 \cdot 10^{-13} \exp(-2450./T)$                              | JPL (2011)                                                                                                                               |
| $\text{NO}_2 + \text{H} \longrightarrow \text{NO} + \text{OH}$                                     | $4.000 \cdot 10^{-10} \exp(-340./T)$                               | JPL (2011)                                                                                                                               |
| $\text{NO}_2 + \text{OH} + \text{M} \longrightarrow \text{HNO}_3 + \text{M}$                       | $ktroe(1.800 \cdot 10^{-30}, 3., 2.800 \cdot 10^{-11}, 0., 0.6)$   | JPL (2011)                                                                                                                               |
| $\text{NO}_3 + \text{O} \longrightarrow \text{NO}_2 + \text{O}_2$                                  | $1.000 \cdot 10^{-11}$                                             | JPL (2011)                                                                                                                               |
| $\text{NO}_3 + \text{OH} \longrightarrow \text{HO}_2 + \text{NO}_2$                                | $2.200 \cdot 10^{-11}$                                             | JPL (2011)                                                                                                                               |
| $\text{NO}_3 + \text{HO}_2 \longrightarrow \text{NO}_2 + \text{OH} + \text{O}_2$                   | $3.500 \cdot 10^{-12}$                                             | JPL (2011)                                                                                                                               |
| $\text{NO}_3 + \text{NO} \longrightarrow 2 \cdot \text{NO}_2$                                      | $1.500 \cdot 10^{-11} \exp(170./T)$                                | JPL (2011)                                                                                                                               |
| $\text{HNO}_3 + \text{OH} \longrightarrow \text{H}_2\text{O} + \text{NO}_3$                        |                                                                    | $X/(1 + X/(2.7 \cdot 10^{-17} \exp(2199/T))) + 2.4 \cdot 10^{-14} \exp(460/T); X = M6.5 \cdot 10^{-34} \exp(1335/T) - \text{JPL (2011)}$ |
| $\text{NO} + \text{OH} \longrightarrow \text{HONO}$                                                | $ktroe(7.000 \cdot 10^{-31}, 2.6, 3.600 \cdot 10^{-11}, 0.1, 0.6)$ | JPL (2011)                                                                                                                               |
| $\text{HONO} + \text{OH} \longrightarrow \text{H}_2\text{O} + \text{NO}_2$                         | $1.800 \cdot 10^{-11} \exp(-390./T)$                               | JPL (2011)                                                                                                                               |
| $\text{NO}_2 + \text{HO}_2 + \text{M} \longrightarrow \text{HO}_2\text{NO}_2 + \text{M}$           | $ktroe(2.000 \cdot 10^{-31}, 3.4, 2.900 \cdot 10^{-12}, 1.1, 0.6)$ | JPL (2011)                                                                                                                               |
| $\text{HO}_2\text{NO}_2 + \text{OH} \longrightarrow \text{H}_2\text{O} + \text{NO}_2 + \text{O}_2$ | $1.300 \cdot 10^{-12} \exp(380./T)$                                | JPL (2011)                                                                                                                               |
| $\text{HO}_2\text{NO}_2 + \text{M} \longrightarrow \text{HO}_2 + \text{NO}_2 + \text{M}$           |                                                                    | $[\text{NO}_2 - \text{NO}_3] * \exp(-10900./T)/2.1 \cdot 10^{-27} \text{ JPL (2011)}$                                                    |
| $\text{NO}_2 + \text{NO}_3 + \text{M} \longrightarrow \text{M} + \text{N}_2\text{O}_5$             | $ktroe(2.000 \cdot 10^{-30}, 4.4, 1.400 \cdot 10^{-12}, 0.7, 0.6)$ | JPL (2011)                                                                                                                               |
| $\text{N}_2\text{O}_5 + \text{M} \longrightarrow \text{NO}_2 + \text{NO}_3 + \text{M}$             | $kN2O5$                                                            | $[\text{NO}_2 - \text{NO}_3] * \exp(-11000/T)/2.7 \cdot 10^{-27} \text{ JPL (2011)}$                                                     |
| $\text{NH}_3 + \text{OH} \longrightarrow$                                                          | $1.700 \cdot 10^{-12} \exp(-710./T)$                               | JPL (2011)                                                                                                                               |

Table S6: C1 oxidation

| reaction                                                                                                          | rate coefficient                                                    | reference                  |
|-------------------------------------------------------------------------------------------------------------------|---------------------------------------------------------------------|----------------------------|
| $\text{CO} + \text{OH} \longrightarrow \text{CO}_2 + \text{H}$                                                    | $kactiv(1.5 \cdot 10^{-13}, -0.6, 2.1 \cdot 10^9, -6.1)$            | JPL (2011)                 |
| $\text{CO} + \text{OH} + \text{M} \longrightarrow \text{CO}_2 + \text{HO}_2 + \text{M}$                           | $ktroe(5.900 \cdot 10^{-33}, 1.4, 1.100 \cdot 10^{-12}, -1.3, 0.6)$ |                            |
| $\text{CH}_4 + \text{OH} \longrightarrow \text{CH}_3\text{O}_2 + \text{H}_2\text{O}$                              | $2.450 \cdot 10^{-12} \exp(-1775./T)$                               | JPL (2011)                 |
| $\text{CH}_3\text{OH} + \text{OH} \longrightarrow \text{CH}_2\text{O} + \text{HO}_2 + \text{H}_2\text{O}$         | $2.900 \cdot 10^{-12} \exp(-345./T)$                                | JPL (2011)                 |
| $\text{CH}_3\text{O}_2 + \text{NO} \longrightarrow \text{CH}_2\text{O} + \text{NO}_2 + \text{HO}_2$               | $1.960 \cdot 10^{-12} \exp(403./T)$                                 | Orlando and Tyndall (2012) |
| $\text{CH}_3\text{O}_2 + \text{HO}_2 \longrightarrow \text{CH}_3\text{OOH} + \text{O}_2$                          | $3.800 \cdot 10^{-13} \exp(730./T)$                                 | Orlando and Tyndall (2012) |
| $\text{CH}_3\text{O}_2 + \text{CH}_3\text{O}_2 \longrightarrow 2 \cdot \text{CH}_2\text{O} + 2 \cdot \text{HO}_2$ | $7.400 \cdot 10^{-13} \exp(-520./T)$                                | IUPAC (2006)               |

Table S6: C1 oxidation (... continued)

| reaction                                                                                                                                                       | rate coefficient                                                   | reference                           |
|----------------------------------------------------------------------------------------------------------------------------------------------------------------|--------------------------------------------------------------------|-------------------------------------|
| $\text{CH}_3\text{O}_2 + \text{CH}_3\text{O}_2 \longrightarrow \text{CH}_2\text{O} + \text{CH}_3\text{OH}$                                                     | $2.330 \cdot 10^{-14} \exp(678./T)$                                | own fit for $T = 240 - 300\text{K}$ |
| $\text{CH}_2\text{O} + \text{O} \longrightarrow \text{HO}_2 + \text{OH} + \text{CO}$                                                                           | $3.400 \cdot 10^{-11} \exp(-1600./T)$                              | JPL (2011)                          |
| $\text{CH}_2\text{O} + \text{OH} \longrightarrow \text{CO} + \text{H}_2\text{O} + \text{H}$                                                                    | $5.500 \cdot 10^{-12} \exp(125./T)$                                | JPL (2011)                          |
| $\text{CH}_2\text{O} + \text{HO}_2 \longrightarrow \text{HOCH}_2\text{OO}$                                                                                     | $9.700 \cdot 10^{-15} \exp(625./T)$                                | IUPAC (2006)                        |
| $\text{CH}_2\text{O} + \text{NO}_3 \longrightarrow \text{CO} + \text{HO}_2 + \text{HNO}_3$                                                                     | $6.000 \cdot 10^{-13} \exp(-2058./T)$                              |                                     |
| $\text{CH}_3\text{OOH} + \text{OH} \longrightarrow 0.7 \cdot \text{CH}_3\text{O}_2 + 0.3 \cdot \text{OH} + 0.3 \cdot \text{CH}_2\text{O} + \text{H}_2\text{O}$ | $3.800 \cdot 10^{-12} \exp(200./T)$                                | JPL (2011)                          |
| $\text{HCOOH} + \text{OH} \longrightarrow \text{CO}_2 + \text{HO}_2 + \text{H}_2\text{O}$                                                                      | $4.000 \cdot 10^{-13}$                                             | JPL (2011)                          |
| $\text{HOCH}_2\text{OO} \longrightarrow \text{CH}_2\text{O} + \text{HO}_2$                                                                                     | $2.400 \cdot 10^{12} \exp(-7000./T)$                               | Lamarque et al. (2012)              |
| $\text{HOCH}_2\text{OO} + \text{NO} \longrightarrow \text{HCOOH} + \text{NO}_2 + \text{HO}_2$                                                                  | $2.600 \cdot 10^{-12} \exp(265./T)$                                | Lamarque et al. (2012)              |
| $\text{HOCH}_2\text{OO} + \text{HO}_2 \longrightarrow \text{H}_2\text{O} + \text{HCOOH}$                                                                       | $7.500 \cdot 10^{-13} \exp(700./T)$                                | Lamarque et al. (2012)              |
| $\text{HCN} + \text{OH} \longrightarrow \text{CO} + \text{NO} + \text{H}_2\text{O}$                                                                            | $1.200 \cdot 10^{-13} \exp(-400./T)$                               | JPL (2011), products: Tyndall       |
| $\text{CH}_3\text{O}_2 + \text{NO}_2 + \text{M} \longrightarrow \text{CH}_3\text{O}_2\text{NO}_2 + \text{M}$                                                   | $ktroe(1.000 \cdot 10^{-30}, 4.8, 7.200 \cdot 10^{-12}, 2.1, 0.6)$ | JPL (2011)                          |
| $\text{CH}_3\text{O}_2\text{NO}_2 + \text{M} \longrightarrow \text{CH}_3\text{O}_2 + \text{NO}_2 + \text{M}$                                                   |                                                                    |                                     |

Table S7: C2 oxidation

| reaction                                                                                                                                                                                                                          | rate coefficient                                                    | reference                                                                                                     |
|-----------------------------------------------------------------------------------------------------------------------------------------------------------------------------------------------------------------------------------|---------------------------------------------------------------------|---------------------------------------------------------------------------------------------------------------|
| $\text{C}_2\text{H}_2 + \text{OH} + \text{M} \longrightarrow 0.65 \cdot \text{GLYOXAL} + 0.65 \cdot \text{OH} + 0.35 \cdot \text{HCOOH} + 0.35 \cdot \text{HO}_2 + 0.35 \cdot \text{CO} + \text{M}$                               | $ktroe(5.500 \cdot 10^{-30}, 0., 8.300 \cdot 10^{-13}, -2., 0.6)$   | JPL (2011)                                                                                                    |
| $\text{C}_2\text{H}_4 + \text{OH} + \text{M} \longrightarrow \text{EO}_2 + \text{M}$                                                                                                                                              | $ktroe(1.000 \cdot 10^{-28}, 4.5, 7.500 \cdot 10^{-12}, 0.85, 0.6)$ | JPL (2011)                                                                                                    |
| $\text{C}_2\text{H}_4 + \text{O}_3 \longrightarrow \text{CH}_2\text{O} + 0.65 \cdot \text{CO} + 0.15 \cdot \text{OH} + 0.15 \cdot \text{HO}_2 + 0.5 \cdot \text{H}_2\text{O} + 0.35 \cdot \text{HCOOH}$                           | $9.100 \cdot 10^{-15} \exp(-2580./T)$                               | IUPAC (2006)                                                                                                  |
| $\text{C}_2\text{H}_6 + \text{OH} \longrightarrow \text{C}_2\text{H}_5\text{O}_2 + \text{H}_2\text{O}$                                                                                                                            | $7.660 \cdot 10^{-12} \exp(-1020./T)$                               | JPL (2011)                                                                                                    |
| $\text{C}_2\text{H}_5\text{OH} + \text{OH} \longrightarrow \text{CH}_3\text{CHO} + \text{HO}_2 + \text{H}_2\text{O}$                                                                                                              | $3.350 \cdot 10^{-12} \exp(0./T)$                                   | JPL (2011)                                                                                                    |
| $\text{CH}_3\text{CHO} + \text{OH} \longrightarrow \text{CH}_3\text{CO}_3 + \text{H}_2\text{O}$                                                                                                                                   | $4.630 \cdot 10^{-12} \exp(350./T)$                                 | JPL (2011)                                                                                                    |
| $\text{CH}_3\text{CHO} + \text{NO}_3 \longrightarrow \text{CH}_3\text{CO}_3 + \text{HNO}_3$                                                                                                                                       | $1.400 \cdot 10^{-12} \exp(-1900./T)$                               | JPL (2011)                                                                                                    |
| $\text{CH}_3\text{COOOH} + \text{OH} \longrightarrow 0.5 \cdot \text{CH}_3\text{CO}_3 + \text{H}_2\text{O} + 0.5 \cdot \text{CH}_2\text{O} + 0.5 \cdot \text{CO}_2 + 0.5 \cdot \text{OH}$                                         | $1.000 \cdot 10^{-12}$                                              | Orlando (p.c.) added OH                                                                                       |
| $\text{C}_2\text{H}_5\text{O}_2 + \text{NO} \longrightarrow \text{CH}_3\text{CHO} + \text{HO}_2 + \text{NO}_2$                                                                                                                    | $2.620 \cdot 10^{-12} \exp(373./T)$                                 | Orlando and Tyndall (2012)                                                                                    |
| $\text{C}_2\text{H}_5\text{O}_2 + \text{HO}_2 \longrightarrow \text{C}_2\text{H}_5\text{OOH} + \text{O}_2$                                                                                                                        | $7.400 \cdot 10^{-13} \exp(700./T)$                                 | Orlando and Tyndall (2012)                                                                                    |
| $\text{C}_2\text{H}_5\text{O}_2 + \text{CH}_3\text{O}_2 \longrightarrow 0.7 \cdot \text{CH}_2\text{O} + 0.8 \cdot \text{CH}_3\text{CHO} + \text{HO}_2 + 0.3 \cdot \text{CH}_3\text{OH} + 0.2 \cdot \text{C}_2\text{H}_5\text{OH}$ | $2.000 \cdot 10^{-13}$                                              | Orlando (p.c.), products: Tyndall (p.c.)                                                                      |
| $\text{C}_2\text{H}_5\text{O}_2 + \text{CH}_3\text{CO}_3 \longrightarrow \text{CH}_3\text{CHO} + \text{HO}_2 + \text{CH}_3\text{O}_2 + \text{CO}_2$                                                                               | $1.800 \cdot 10^{-12} \exp(500./T)$                                 | 10% lower than $\text{CH}_3\text{O}_2 + \text{CH}_3\text{CO}_3$ ; Orlando and Tyndall (2012) only give k@298K |

Table S7: C2 oxidation (... continued)

| reaction                                                                                                                                                                                                                                                                      | rate coefficient                                                   | reference                                                                        |
|-------------------------------------------------------------------------------------------------------------------------------------------------------------------------------------------------------------------------------------------------------------------------------|--------------------------------------------------------------------|----------------------------------------------------------------------------------|
| $\text{C}_2\text{H}_5\text{O}_2 + \text{C}_2\text{H}_5\text{O}_2 \longrightarrow 1.6 \cdot \text{CH}_3\text{CHO} + 1.2 \cdot \text{HO}_2 + 0.4 \cdot \text{C}_2\text{H}_5\text{OH}$                                                                                           | $7.600 \cdot 10^{-14}$                                             | Orlando and Tyndall (2012)                                                       |
| $\text{C}_2\text{H}_5\text{OOH} + \text{OH} \longrightarrow 0.5 \cdot \text{C}_2\text{H}_5\text{O}_2 + 0.5 \cdot \text{CH}_3\text{CHO} + 0.5 \cdot \text{OH} + \text{H}_2\text{O}$                                                                                            | $3.800 \cdot 10^{-12} \exp(200./T)$                                | no data, analog to $\text{CH}_3\text{OOH} + \text{OH}$                           |
| $\text{CH}_3\text{CO}_3 + \text{NO} \longrightarrow \text{CH}_3\text{O}_2 + \text{CO}_2 + \text{NO}_2$                                                                                                                                                                        | $7.500 \cdot 10^{-12} \exp(290./T)$                                | Orlando and Tyndall (2012)                                                       |
| $\text{CH}_3\text{CO}_3 + \text{NO}_2 + \text{M} \longrightarrow \text{M} + \text{PAN}$                                                                                                                                                                                       | $ktroe(2.700 \cdot 10^{-28}, 7.1, 1.200 \cdot 10^{-11}, 0.9, 0.6)$ |                                                                                  |
| $\text{CH}_3\text{CO}_3 + \text{HO}_2 \longrightarrow 0.4 \cdot \text{CH}_3\text{COOOH} + 0.2 \cdot \text{CH}_3\text{COOH} + 0.2 \cdot \text{O}_3 + 0.4 \cdot \text{CH}_3\text{O}_2 + 0.4 \cdot \text{OH} + 0.4 \cdot \text{CO}_2$                                            | $5.200 \cdot 10^{-13} \exp(980./T)$                                | Orlando and Tyndall (2012)                                                       |
| $\text{CH}_3\text{CO}_3 + \text{CH}_3\text{O}_2 \longrightarrow \text{CH}_2\text{O} + 0.9 \cdot \text{CH}_3\text{O}_2 + 0.9 \cdot \text{HO}_2 + 0.9 \cdot \text{CO}_2 + 0.1 \cdot \text{CH}_3\text{COOH}$                                                                     | $2.000 \cdot 10^{-12} \exp(500./T)$                                | Orlando and Tyndall (2012)                                                       |
| $\text{CH}_3\text{CO}_3 + \text{CH}_3\text{CO}_3 \longrightarrow 2 \cdot \text{CH}_3\text{O}_2 + 2 \cdot \text{CO}_2$                                                                                                                                                         | $2.900 \cdot 10^{-12} \exp(500./T)$                                | Orlando and Tyndall (2012)                                                       |
| $\text{CH}_3\text{COOH} + \text{OH} \longrightarrow \text{CH}_3\text{O}_2 + \text{CO}_2 + \text{H}_2\text{O}$                                                                                                                                                                 | $3.150 \cdot 10^{-14} \exp(920./T)$                                | JPL (2011)                                                                       |
| $\text{PAN} + \text{M} \longrightarrow \text{CH}_3\text{CO}_3 + \text{NO}_2 + \text{M}$                                                                                                                                                                                       |                                                                    |                                                                                  |
| $\text{PAN} + \text{OH} \longrightarrow \text{CH}_2\text{O} + \text{CO}_2 + \text{NO}_3$                                                                                                                                                                                      | $4.000 \cdot 10^{-14}$                                             | JPL (2011), includes implicit $\text{NO} \longrightarrow \text{NO}_2$ conversion |
| $\text{EO}_2 + \text{NO} \longrightarrow 0.75 \cdot \text{EO} + \text{NO}_2 + 0.5 \cdot \text{CH}_2\text{O} + 0.25 \cdot \text{HO}_2$                                                                                                                                         | $4.200 \cdot 10^{-12} \exp(180./T)$                                | Lamarque et al. (2012)                                                           |
| $\text{EO}_2 + \text{HO}_2 \longrightarrow \text{EOOH}$                                                                                                                                                                                                                       | $7.500 \cdot 10^{-13} \exp(700./T)$                                |                                                                                  |
| $\text{EO}_2 + \text{CH}_3\text{O}_2 \longrightarrow 0.5 \cdot \text{EO} + 0.5 \cdot \text{O}_2 + 0.5 \cdot \text{CH}_2\text{O} + 0.5 \cdot \text{HO}_2 + 0.5 \cdot \text{CH}_3\text{OH} + 0.5 \cdot \text{GLYALD}$                                                           | $4.000 \cdot 10^{-12} \exp(1000./T)$                               | Tyndall (p.c.)                                                                   |
| $\text{EO}_2 + \text{CH}_3\text{CO}_3 \longrightarrow \text{CH}_3\text{O}_2 + \text{EO} + \text{CO}_2$                                                                                                                                                                        | $1.000 \cdot 10^{-11}$                                             |                                                                                  |
| $\text{EO} + \text{O}_2 \longrightarrow \text{GLYALD} + \text{HO}_2$                                                                                                                                                                                                          | $1.000 \cdot 10^{-14}$                                             | Lamarque et al. (2012)                                                           |
| $\text{EO} \longrightarrow 2 \cdot \text{CH}_2\text{O} + \text{HO}_2$                                                                                                                                                                                                         | $1.600 \cdot 10^{11} \exp(-4150./T)$                               | Lamarque et al. (2012)                                                           |
| $\text{GLYOXAL} + \text{OH} \longrightarrow 0.6 \cdot \text{HO}_2 + 1.2 \cdot \text{CO} + \text{H}_2\text{O} + 0.4 \cdot \text{HCOCO}_3$                                                                                                                                      | $3.100 \cdot 10^{-12} \exp(340./T)$                                | MCM3.2                                                                           |
| $\text{GLYOXAL} + \text{NO}_3 \longrightarrow 0.6 \cdot \text{HO}_2 + 1.2 \cdot \text{CO} + 0.4 \cdot \text{HCOCO}_3 + \text{HNO}_3$                                                                                                                                          | $2.500 \cdot 10^{-12}$                                             | Taraborrelli et al. (2009)                                                       |
| $\text{GLYALD} + \text{OH} \longrightarrow 0.2 \cdot \text{GLYOXAL} + 0.2 \cdot \text{HO}_2 + 0.8 \cdot \text{HOCH}_2\text{CO}_3 + \text{H}_2\text{O}$                                                                                                                        | $1.000 \cdot 10^{-11}$                                             | Taraborrelli et al. (2009)                                                       |
| $\text{GLYALD} + \text{NO}_3 \longrightarrow \text{HNO}_3 + \text{HOCH}_2\text{CO}_3$                                                                                                                                                                                         | $1.440 \cdot 10^{-12} \exp(-1862./T)$                              | Taraborrelli et al. (2009)                                                       |
| $\text{HOCH}_2\text{CO}_3 + \text{NO}_2 + \text{M} \longrightarrow \text{CH}_2\text{O} + \text{CO}_2 + \text{HNO}_3 + \text{M}$                                                                                                                                               | $ktroe(2.700 \cdot 10^{-28}, 7.1, 1.200 \cdot 10^{-11}, 0.9, 0.6)$ | Orlando and Tyndall (2012)                                                       |
| $\text{HOCH}_2\text{CO}_3 + \text{HO}_2 \longrightarrow 0.4 \cdot \text{HOCH}_2\text{CO}_3\text{H} + 0.2 \cdot \text{HOCH}_2\text{CO}_2\text{H} + 0.2 \cdot \text{O}_3 + 0.4 \cdot \text{CO}_2 + 0.4 \cdot \text{OH} + 0.4 \cdot \text{HO}_2 + 0.4 \cdot \text{CH}_2\text{O}$ | $4.300 \cdot 10^{-13} \exp(1040./T)$                               | Orlando (p.c.)                                                                   |
| $\text{HOCH}_2\text{CO}_3 + \text{CH}_3\text{O}_2 \longrightarrow 2 \cdot \text{CH}_2\text{O} + \text{CO}_2 + 2 \cdot \text{HO}_2$                                                                                                                                            | $1.000 \cdot 10^{-11}$                                             | Taraborrelli et al. (2009)                                                       |
| $\text{HOCH}_2\text{CO}_3 + \text{CH}_3\text{CO}_3 \longrightarrow \text{CH}_3\text{O}_2 + 2 \cdot \text{CO}_2 + \text{HO}_2 + \text{CH}_2\text{O}$                                                                                                                           | $1.000 \cdot 10^{-11}$                                             | Taraborrelli et al. (2009)                                                       |

Table S7: C2 oxidation (... continued)

| reaction                                                                                                                                                         | rate coefficient                      | reference                  |
|------------------------------------------------------------------------------------------------------------------------------------------------------------------|---------------------------------------|----------------------------|
| $\text{HOCH}_2\text{CO}_3 + \text{NO} \longrightarrow \text{HO}_2 + \text{NO}_2 + \text{CH}_2\text{O} + \text{CO}_2$                                             | $8.100 \cdot 10^{-12} \exp(270./T)$   | Taraborrelli et al. (2009) |
| $\text{HOCH}_2\text{CO}_3 + \text{NO}_3 \longrightarrow \text{HO}_2 + \text{NO}_2 + \text{CH}_2\text{O} + \text{CO}_2$                                           | $4.000 \cdot 10^{-12}$                | Taraborrelli et al. (2009) |
| $\text{HOCH}_2\text{CO}_2\text{H} + \text{OH} \longrightarrow \text{CH}_2\text{O} + \text{HO}_2 + \text{CO}_2 + \text{H}_2\text{O}$                              | $2.730 \cdot 10^{-12}$                | Taraborrelli et al. (2009) |
| $\text{HOCH}_2\text{CO}_3\text{H} + \text{OH} \longrightarrow \text{H}_2\text{O} + \text{HOCH}_2\text{CO}_3$                                                     | $6.190 \cdot 10^{-12}$                | Taraborrelli et al. (2009) |
| $\text{HCOCO}_3 + \text{CH}_3\text{O}_2 \longrightarrow \text{CO} + 2 \cdot \text{HO}_2 + \text{CO}_2 + \text{CH}_2\text{O}$                                     | $1.000 \cdot 10^{-11}$                | Taraborrelli et al. (2009) |
| $\text{HCOCO}_3 + \text{CH}_3\text{CO}_3 \longrightarrow \text{CO} + \text{HO}_2 + \text{CH}_3\text{O}_2 + 2 \cdot \text{CO}_2$                                  | $1.000 \cdot 10^{-11}$                | Taraborrelli et al. (2009) |
| $\text{HCOCO}_3 + \text{HO}_2 \longrightarrow 0.7 \cdot \text{HCOCO}_3\text{H} + 0.7 \cdot \text{O}_2 + 0.3 \cdot \text{HCOCO}_2\text{H} + 0.3 \cdot \text{O}_3$ | $4.300 \cdot 10^{-13} \exp(1040./T)$  | Taraborrelli et al. (2009) |
| $\text{HCOCO}_3 + \text{NO} \longrightarrow \text{CO} + \text{HO}_2 + \text{NO}_2 + \text{CO}_2$                                                                 | $8.100 \cdot 10^{-12} \exp(270./T)$   | Taraborrelli et al. (2009) |
| $\text{HCOCO}_3 + \text{NO}_3 \longrightarrow \text{CO} + \text{HO}_2 + \text{NO}_2 + \text{CO}_2$                                                               | $4.000 \cdot 10^{-12}$                | Taraborrelli et al. (2009) |
| $\text{HCOCO}_2\text{H} + \text{OH} \longrightarrow \text{CO} + \text{HO}_2 + \text{CO}_2 + \text{H}_2\text{O}$                                                  | $1.230 \cdot 10^{-11}$                | Taraborrelli et al. (2009) |
| $\text{HCOCO}_3\text{H} + \text{OH} \longrightarrow \text{H}_2\text{O} + \text{HCOCO}_3$                                                                         | $1.580 \cdot 10^{-11}$                | Taraborrelli et al. (2009) |
| $\text{CH}_3\text{CN} + \text{OH} \longrightarrow \text{CH}_2\text{O} + \text{H}_2\text{O} + \text{CO} + \text{NO}_2$                                            | $7.800 \cdot 10^{-13} \exp(-1050./T)$ | products: Tyndall          |

Table S8: C3 oxidation

| reaction                                                                                                                                                                                                                                                                                                                                                                            | rate coefficient                                                            | reference                                                                           |
|-------------------------------------------------------------------------------------------------------------------------------------------------------------------------------------------------------------------------------------------------------------------------------------------------------------------------------------------------------------------------------------|-----------------------------------------------------------------------------|-------------------------------------------------------------------------------------|
| $\text{C}_3\text{H}_6 + \text{OH} + \text{M} \longrightarrow \text{M} + \text{PO}_2$                                                                                                                                                                                                                                                                                                | <i>ktroe</i> ( $8.000 \cdot 10^{-27}, 3.5, 3.000 \cdot 10^{-11}, 0., 0.5$ ) | IUPAC (2006)                                                                        |
| $\text{C}_3\text{H}_6 + \text{O}_3 \longrightarrow 0.28 \cdot \text{CH}_3\text{O}_2 + 0.1 \cdot \text{CH}_4 + 0.075 \cdot \text{CH}_3\text{COOH} + 0.56 \cdot \text{CO} + 0.075 \cdot \text{HCOOH} + 0.09 \cdot \text{H}_2\text{O}_2 + 0.28 \cdot \text{HO}_2 + 0.2 \cdot \text{CO}_2 + 0.545 \cdot \text{CH}_3\text{CHO} + 0.545 \cdot \text{CH}_2\text{O} + 0.36 \cdot \text{OH}$ | $5.500 \cdot 10^{-15} \exp(-1880./T)$                                       | IUPAC (2006)                                                                        |
| $\text{C}_3\text{H}_6 + \text{NO}_3 \longrightarrow \text{PRONO}_3\text{BO}_2$                                                                                                                                                                                                                                                                                                      | $4.600 \cdot 10^{-13} \exp(-1156./T)$                                       | IUPAC (2006)                                                                        |
| $\text{C}_3\text{H}_8 + \text{OH} \longrightarrow \text{C}_3\text{H}_7\text{O}_2 + \text{H}_2\text{O}$                                                                                                                                                                                                                                                                              | $7.600 \cdot 10^{-12} \exp(-585./T)$                                        | IUPAC (2006)                                                                        |
| $\text{CH}_3\text{COCH}_3 + \text{OH} \longrightarrow \text{CH}_3\text{COCH}_2\text{O}_2 + \text{H}_2\text{O}$                                                                                                                                                                                                                                                                      | $\text{CH}_3\text{COCH}_3 - \text{OH}$                                      |                                                                                     |
| $\text{C}_3\text{H}_7\text{O}_2 + \text{NO} \longrightarrow 0.82 \cdot \text{CH}_3\text{COCH}_3 + \text{NO}_2 + \text{HO}_2 + 0.27 \cdot \text{CH}_3\text{CHO}$                                                                                                                                                                                                                     | $2.900 \cdot 10^{-12} \exp(350./T)$                                         | Orlando and Tyndall (2012)                                                          |
| $\text{C}_3\text{H}_7\text{O}_2 + \text{HO}_2 \longrightarrow \text{C}_3\text{H}_7\text{OOH} + \text{O}_2$                                                                                                                                                                                                                                                                          | $7.500 \cdot 10^{-13} \exp(700./T)$                                         | Lamarque et al. (2012)                                                              |
| $\text{C}_3\text{H}_7\text{O}_2 + \text{CH}_3\text{O}_2 \longrightarrow \text{CH}_2\text{O} + 2 \cdot \text{HO}_2 + 0.82 \cdot \text{CH}_3\text{COCH}_3 + 0.27 \cdot \text{CH}_3\text{CHO}$                                                                                                                                                                                         | $3.750 \cdot 10^{-13} \exp(-40./T)$                                         | Lamarque et al. (2012)                                                              |
| $\text{C}_3\text{H}_7\text{O}_2 + \text{CH}_3\text{CO}_3 \longrightarrow 0.82 \cdot \text{CH}_3\text{COCH}_3 + \text{HO}_2 + 0.27 \cdot \text{CH}_3\text{CHO} + \text{CO}_2 + \text{CH}_3\text{O}_2$                                                                                                                                                                                | $1.000 \cdot 10^{-11}$                                                      | Lamarque et al. (2012)                                                              |
| $\text{C}_3\text{H}_7\text{OOH} + \text{OH} \longrightarrow 0.41 \cdot \text{CH}_3\text{COCH}_3 + 0.5 \cdot \text{OH} + 0.5 \cdot \text{C}_3\text{H}_7\text{O}_2 + 0.5 \cdot \text{H}_2\text{O} + 0.135 \cdot \text{CH}_3\text{CHO}$                                                                                                                                                | $3.800 \cdot 10^{-12} \exp(200./T)$                                         | Lamarque et al. (2012); $1.5 \cdot \text{CH}_3\text{CHO}$ as surrogate for propanal |
| $\text{PO}_2 + \text{NO} \longrightarrow \text{CH}_2\text{O} + \text{CH}_3\text{CHO} + \text{HO}_2 + \text{NO}_2$                                                                                                                                                                                                                                                                   | $4.200 \cdot 10^{-12} \exp(180./T)$                                         | Lamarque et al. (2012)                                                              |

Table S8: C3 oxidation (... continued)

| reaction                                                                                                                                                                                                                                                           | rate coefficient                      | reference                       |
|--------------------------------------------------------------------------------------------------------------------------------------------------------------------------------------------------------------------------------------------------------------------|---------------------------------------|---------------------------------|
| $\text{PO}_2 + \text{NO}_3 \longrightarrow \text{CH}_2\text{O} + \text{CH}_3\text{CHO} + \text{HO}_2 + \text{NO}_2$                                                                                                                                                | $2.500 \cdot 10^{-12}$                | Taraborrelli et al. (2009)      |
| $\text{PO}_2 + \text{HO}_2 \longrightarrow \text{O}_2 + \text{POOH}$                                                                                                                                                                                               | $7.500 \cdot 10^{-13} \exp(700./T)$   | Lamarque et al. (2012)          |
| $\text{PO}_2 + \text{CH}_3\text{O}_2 \longrightarrow 0.5 \cdot \text{CH}_3\text{CHO} + 1.25 \cdot \text{CH}_2\text{O} + \text{HO}_2 + 0.5 \cdot \text{HYAC} + 0.25 \cdot \text{CH}_3\text{OH}$                                                                     | $8.300 \cdot 10^{-13}$                | products: Tyndall (p.c.)        |
| $\text{PO}_2 + \text{CH}_3\text{CO}_3 \longrightarrow \text{CH}_2\text{O} + \text{CH}_3\text{CHO} + \text{HO}_2 + \text{CH}_3\text{O}_2 + \text{CO}_2$                                                                                                             | $1.000 \cdot 10^{-11}$                |                                 |
| $\text{POOH} + \text{OH} \longrightarrow 0.5 \cdot \text{PO}_2 + 0.5 \cdot \text{HYAC} + 0.5 \cdot \text{OH} + \text{H}_2\text{O}$                                                                                                                                 | $3.800 \cdot 10^{-12} \exp(200./T)$   | Lamarque et al. (2012)          |
| $\text{HYAC} + \text{OH} \longrightarrow \text{CH}_3\text{COCHO} + \text{HO}_2 + \text{H}_2\text{O}$                                                                                                                                                               | $3.000 \cdot 10^{-12}$                | IUPAC (2006)                    |
| $\text{CH}_3\text{COCHO} + \text{OH} \longrightarrow \text{CH}_3\text{CO}_3 + \text{CO} + \text{H}_2\text{O}$                                                                                                                                                      | $8.400 \cdot 10^{-13} \exp(830./T)$   | Lamarque et al. (2012)          |
| $\text{CH}_3\text{COCHO} + \text{NO}_3 \longrightarrow \text{CO} + \text{HNO}_3 + \text{CH}_3\text{CO}_3$                                                                                                                                                          | $1.400 \cdot 10^{-12} \exp(-1860./T)$ | Lamarque et al. (2012)          |
| $\text{CH}_3\text{COCH}_2\text{O}_2 + \text{NO} \longrightarrow \text{CH}_2\text{O} + \text{CH}_3\text{CO}_3 + \text{NO}_2$                                                                                                                                        | $2.900 \cdot 10^{-12} \exp(300./T)$   | Lamarque et al. (2012)          |
| $\text{CH}_3\text{COCH}_2\text{O}_2 + \text{HO}_2 \longrightarrow 0.85 \cdot \text{O}_2 + 0.85 \cdot \text{ROOH} + 0.15 \cdot \text{CH}_2\text{O} + 0.15 \cdot \text{CH}_3\text{CO}_3 + 0.15 \cdot \text{OH} + 0.15 \cdot \text{H}_2\text{O}$                      | $8.600 \cdot 10^{-13} \exp(700./T)$   | Lamarque et al. (2012) + MCM3.2 |
| $\text{CH}_3\text{COCH}_2\text{O}_2 + \text{CH}_3\text{O}_2 \longrightarrow 0.3 \cdot \text{CH}_3\text{CO}_3 + 0.8 \cdot \text{CH}_2\text{O} + 0.3 \cdot \text{HO}_2 + 0.2 \cdot \text{HYAC} + 0.5 \cdot \text{CH}_3\text{COCHO} + 0.5 \cdot \text{CH}_3\text{OH}$ | $7.100 \cdot 10^{-13} \exp(500./T)$   | Lamarque et al. (2012)          |
| $\text{CH}_3\text{COCH}_2\text{O}_2 + \text{CH}_3\text{CO}_3 \longrightarrow \text{CH}_2\text{O} + \text{CH}_3\text{CO}_3 + \text{CH}_3\text{O}_2 + \text{CO}_2$                                                                                                   | $1.000 \cdot 10^{-11}$                |                                 |
| $\text{ROOH} + \text{OH} \longrightarrow \text{CH}_3\text{COCH}_2\text{O}_2 + \text{H}_2\text{O}$                                                                                                                                                                  | $3.800 \cdot 10^{-12} \exp(200./T)$   | Lamarque et al. (2012)          |
| $\text{PRONO}_3\text{BO}_2 + \text{NO} \longrightarrow 0.83 \cdot \text{HO}_2 + 0.83 \cdot \text{NOA} + 0.17 \cdot \text{CH}_2\text{O} + 0.17 \cdot \text{CH}_3\text{CHO} + 1.17 \cdot \text{NO}_2$                                                                | $2.540 \cdot 10^{-12} \exp(360./T)$   | Taraborrelli et al. (2009)      |
| $\text{PRONO}_3\text{BO}_2 + \text{NO}_3 \longrightarrow 0.83 \cdot \text{HO}_2 + 0.83 \cdot \text{NOA} + 0.17 \cdot \text{CH}_2\text{O} + 0.17 \cdot \text{CH}_3\text{CHO} + 1.17 \cdot \text{NO}_2$                                                              | $2.500 \cdot 10^{-12}$                | Taraborrelli et al. (2009)      |
| $\text{PRONO}_3\text{BO}_2 + \text{HO}_2 \longrightarrow \text{PR}_2\text{O}_2\text{HNO}_3$                                                                                                                                                                        | $1.320 \cdot 10^{-12} \exp(360./T)$   | Taraborrelli et al. (2009)      |
| $\text{PRONO}_3\text{BO}_2 + \text{CH}_3\text{O}_2 \longrightarrow 0.915 \cdot \text{HO}_2 + 0.915 \cdot \text{NOA} + 0.835 \cdot \text{CH}_2\text{O} + 0.085 \cdot \text{CH}_3\text{CHO} + 0.25 \cdot \text{CH}_3\text{OH}$                                       | $1.000 \cdot 10^{-12}$                |                                 |
| $\text{PRONO}_3\text{BO}_2 + \text{CH}_3\text{CO}_3 \longrightarrow 0.83 \cdot \text{HO}_2 + 0.83 \cdot \text{NOA} + 0.17 \cdot \text{CH}_2\text{O} + 0.17 \cdot \text{CH}_3\text{CHO} + \text{CH}_3\text{O}_2 + \text{CO}_2$                                      | $1.000 \cdot 10^{-11}$                |                                 |
| $\text{PR}_2\text{O}_2\text{HNO}_3 + \text{OH} \longrightarrow 0.5 \cdot \text{PRONO}_3\text{BO}_2 + 0.5 \cdot \text{NOA} + 0.5 \cdot \text{OH} + \text{H}_2\text{O}$                                                                                              | $7.000 \cdot 10^{-12}$                | Taraborrelli et al. (2009)      |
| $\text{NOA} + \text{OH} \longrightarrow \text{CH}_3\text{COCHO} + \text{NO}_2 + \text{H}_2\text{O}$                                                                                                                                                                | $1.300 \cdot 10^{-13}$                | Taraborrelli et al. (2009)      |

Table S9: C4 oxidation

| reaction                                                  | rate coefficient       | reference              |
|-----------------------------------------------------------|------------------------|------------------------|
| $\text{BIGENE} + \text{OH} \longrightarrow \text{ENEO}_2$ | $5.400 \cdot 10^{-11}$ | Lamarque et al. (2012) |

Table S9: C4 oxidation (... continued)

| reaction                                                                                                                                                                                                                                                                                                                                           | rate coefficient                      | reference                                                                                                       |
|----------------------------------------------------------------------------------------------------------------------------------------------------------------------------------------------------------------------------------------------------------------------------------------------------------------------------------------------------|---------------------------------------|-----------------------------------------------------------------------------------------------------------------|
| $\text{MEK} + \text{OH} \longrightarrow \text{H}_2\text{O} + \text{MEKO}_2$                                                                                                                                                                                                                                                                        | $2.300 \cdot 10^{-12} \exp(-170./T)$  | Lamarque et al. (2012)                                                                                          |
| $\text{MEKO}_2 + \text{NO} \longrightarrow \text{CH}_3\text{CHO} + \text{CH}_3\text{CO}_3 + \text{NO}_2$                                                                                                                                                                                                                                           | $4.032 \cdot 10^{-12} \exp(180./T)$   | treated like $\text{MEKBO}_2$ from MCM3.2; $A = 4.200 \cdot 10^{-12} \cdot 0.96$ ; 4% nitrate yield as for MVKN |
| $\text{MEKO}_2 + \text{NO} \longrightarrow \text{MEKNO}_3$                                                                                                                                                                                                                                                                                         | $1.680 \cdot 10^{-13} \exp(180./T)$   | $A = 4.200 \cdot 10^{-12} \cdot 0.04$ ; 4% nitrate yield as for MVKN                                            |
| $\text{MEKO}_2 + \text{HO}_2 \longrightarrow \text{MEKOOH}$                                                                                                                                                                                                                                                                                        | $7.500 \cdot 10^{-13} \exp(700./T)$   | Lamarque et al. (2012)                                                                                          |
| $\text{MEKO}_2 + \text{CH}_3\text{O}_2 \longrightarrow 0.3 \cdot \text{CH}_3\text{CHO} + 0.3 \cdot \text{CH}_3\text{CO}_3 + \text{CH}_2\text{O} + 0.3 \cdot \text{HO}_2 + 0.3 \cdot \text{O}_2 + 0.5 \cdot \text{BIACETOH} + 0.5 \cdot \text{CH}_3\text{OH} + 0.266 \cdot \text{HYAC}$                                                             | $1.000 \cdot 10^{-12}$                | Tyndall (p.c.) added $\text{CH}_2\text{O}$ to first and third channel                                           |
| $\text{MEKO}_2 + \text{CH}_3\text{CO}_3 \longrightarrow \text{CH}_3\text{CHO} + \text{CH}_3\text{CO}_3 + \text{CH}_3\text{O}_2 + \text{CO}_2$                                                                                                                                                                                                      | $1.000 \cdot 10^{-11}$                |                                                                                                                 |
| $\text{MEKOOH} + \text{OH} \longrightarrow \text{H}_2\text{O} + \text{MEKO}_2$                                                                                                                                                                                                                                                                     | $3.800 \cdot 10^{-12} \exp(200./T)$   | Lamarque et al. (2012)                                                                                          |
| $\text{ENEO}_2 + \text{NO} \longrightarrow \text{CH}_3\text{CHO} + 0.5 \cdot \text{CH}_2\text{O} + 0.5 \cdot \text{CH}_3\text{COCH}_3 + \text{HO}_2 + \text{NO}_2$                                                                                                                                                                                 | $4.200 \cdot 10^{-12} \exp(180./T)$   | Lamarque et al. (2012)                                                                                          |
| $\text{ENEO}_2 + \text{HO}_2 \longrightarrow 1.333 \cdot \text{POOH} + \text{O}_2$                                                                                                                                                                                                                                                                 | $7.500 \cdot 10^{-13} \exp(700./T)$   | factor 4/3 to preserve carbon                                                                                   |
| $\text{ENEO}_2 + \text{CH}_3\text{O}_2 \longrightarrow 0.665 \cdot \text{HYAC} + 0.5 \cdot \text{CH}_3\text{OH} + 0.5 \cdot \text{CH}_3\text{CHO} + 0.25 \cdot \text{CH}_3\text{COCH}_3 + 0.75 \cdot \text{CH}_2\text{O} + \text{HO}_2$                                                                                                            | $1.000 \cdot 10^{-12}$                | products: Tyndall (p.c.)                                                                                        |
| $\text{ENEO}_2 + \text{CH}_3\text{CO}_3 \longrightarrow \text{CH}_3\text{CHO} + 0.5 \cdot \text{CH}_2\text{O} + 0.5 \cdot \text{CH}_3\text{COCH}_3 + \text{HO}_2 + \text{CH}_3\text{O}_2 + \text{CO}_2$                                                                                                                                            | $1.000 \cdot 10^{-11}$                |                                                                                                                 |
| $\text{MACR} + \text{OH} \longrightarrow 0.45 \cdot \text{MCO}_3 + 0.55 \cdot \text{MACRO}_2$                                                                                                                                                                                                                                                      | $1.860 \cdot 10^{-11} \exp(175./T)$   | Tnydall (p.c.)                                                                                                  |
| $\text{MACR} + \text{O}_3 \longrightarrow 0.59 \cdot \text{CH}_3\text{COCHO} + 0.41 \cdot \text{CH}_3\text{CO}_3 + 0.82 \cdot \text{CO} + 0.41 \cdot \text{HO}_2 + 0.82 \cdot \text{OH} + 0.033750 \cdot \text{HCOOH} + 0.556250 \cdot \text{CH}_2\text{O} + 0.123750 \cdot \text{H}_2\text{O}_2$                                                  | $1.360 \cdot 10^{-15} \exp(-2112./T)$ |                                                                                                                 |
| $\text{MACR} + \text{NO}_3 \longrightarrow \text{HNO}_3 + \text{MCO}_3$                                                                                                                                                                                                                                                                            | $2.880 \cdot 10^{-12} \exp(-1862./T)$ |                                                                                                                 |
| $\text{MCO}_3 + \text{CH}_3\text{O}_2 \longrightarrow 0.315 \cdot \text{CH}_3\text{CO}_3 + 0.585 \cdot \text{CH}_3\text{O}_2 + 0.585 \cdot \text{CO} + 1.9 \cdot \text{CH}_2\text{O} + 0.9 \cdot \text{CO}_2 + 0.9 \cdot \text{HO}_2 + 0.1 \cdot \text{MACO}_2\text{H}$                                                                            | $1.000 \cdot 10^{-11}$                | $\text{MCO}_3$ is an acyl radical, therefore $\text{kRO}_2\text{CH}_3\text{CO}_3$                               |
| $\text{MCO}_3 + \text{CH}_3\text{CO}_3 \longrightarrow \text{CH}_2\text{O} + 0.35 \cdot \text{CH}_3\text{CO}_3 + 1.65 \cdot \text{CH}_3\text{O}_2 + 0.65 \cdot \text{CO} + 2 \cdot \text{CO}_2$                                                                                                                                                    | $1.000 \cdot 10^{-11}$                |                                                                                                                 |
| $\text{MCO}_3 + \text{HO}_2 \longrightarrow 0.44 \cdot \text{OH} + 0.154 \cdot \text{CH}_3\text{CO}_3 + 0.286 \cdot \text{CH}_3\text{O}_2 + 0.286 \cdot \text{CO} + 0.44 \cdot \text{CH}_2\text{O} + 0.44 \cdot \text{CO}_2 + 0.15 \cdot \text{MACO}_2\text{H} + 0.15 \cdot \text{O}_3 + 0.41 \cdot \text{MACO}_3\text{H} + 0.41 \cdot \text{O}_2$ | $4.300 \cdot 10^{-13} \exp(1040./T)$  |                                                                                                                 |
| $\text{MCO}_3 + \text{NO} \longrightarrow \text{CH}_2\text{O} + 0.35 \cdot \text{CH}_3\text{CO}_3 + 0.65 \cdot \text{CH}_3\text{O}_2 + 0.65 \cdot \text{CO} + \text{NO}_2 + \text{CO}_2$                                                                                                                                                           | $8.700 \cdot 10^{-12} \exp(290./T)$   |                                                                                                                 |
| $\text{MCO}_3 + \text{NO}_3 \longrightarrow \text{CH}_2\text{O} + 0.35 \cdot \text{CH}_3\text{CO}_3 + 0.65 \cdot \text{CH}_3\text{O}_2 + 0.65 \cdot \text{CO} + \text{NO}_2 + \text{CO}_2$                                                                                                                                                         | $4.000 \cdot 10^{-12}$                |                                                                                                                 |

Table S9: C4 oxidation (... continued)

| reaction                                                                                                                                                                                                                                                                                                                                                       | rate coefficient                                                   | reference                                                                                                                                |
|----------------------------------------------------------------------------------------------------------------------------------------------------------------------------------------------------------------------------------------------------------------------------------------------------------------------------------------------------------------|--------------------------------------------------------------------|------------------------------------------------------------------------------------------------------------------------------------------|
| $\text{MCO}_3 + \text{NO}_2 + \text{M} \longrightarrow \text{M} + \text{MPAN}$                                                                                                                                                                                                                                                                                 | $ktroe(2.700 \cdot 10^{-28}, 7.1, 1.200 \cdot 10^{-11}, 0.9, 0.3)$ |                                                                                                                                          |
| $\text{MACRO}_2 + \text{CH}_3\text{O}_2 \longrightarrow 0.75 \cdot \text{CO} + 0.75 \cdot \text{HYAC} + \text{CH}_2\text{O} + 1.5 \cdot \text{HO}_2 + 0.25 \cdot \text{MACROH} + 0.25 \cdot \text{O}_2$                                                                                                                                                        | $9.200 \cdot 10^{-14}$                                             | products: Tyndall (p.c.)                                                                                                                 |
| $\text{MACRO}_2 + \text{CH}_3\text{CO}_3 \longrightarrow 0.85 \cdot \text{CO} + 0.85 \cdot \text{HYAC} + 0.15 \cdot \text{CH}_2\text{O} + 0.15 \cdot \text{CH}_3\text{COCHO} + \text{HO}_2 + \text{CH}_3\text{O}_2 + \text{CO}_2$                                                                                                                              | $1.000 \cdot 10^{-11}$                                             |                                                                                                                                          |
| $\text{MACRO}_2 + \text{NO} \longrightarrow \text{NO}_2 + 0.85 \cdot \text{CO} + 0.85 \cdot \text{HYAC} + \text{HO}_2 + 0.15 \cdot \text{CH}_2\text{O} + 0.15 \cdot \text{CH}_3\text{COCHO}$                                                                                                                                                                   | $2.464 \cdot 10^{-12} \exp(360./T)$                                | $A = 2.54 \cdot 10^{-12} \cdot 0.97$ ; 3% MACRN-yield inferred from HYAC 42% yield at high-NO from Crounse et al. (2011) (Tyndall, p.c.) |
| $\text{MACRO}_2 + \text{NO} \longrightarrow \text{MACRN}$                                                                                                                                                                                                                                                                                                      | $7.620 \cdot 10^{-14} \exp(360./T)$                                | $A = 2.54 \cdot 10^{-12} \cdot 0.03$ ; 3% MACRN-yield inferred from HYAC 42% yield at high-NO from Crounse et al. (2011) (Tyndall, p.c.) |
| $\text{MACRO}_2 + \text{NO}_3 \longrightarrow 0.85 \cdot \text{CO} + 0.85 \cdot \text{HYAC} + 0.15 \cdot \text{CH}_2\text{O} + 0.15 \cdot \text{CH}_3\text{COCHO} + \text{HO}_2 + \text{NO}_2$                                                                                                                                                                 | $2.500 \cdot 10^{-12}$                                             |                                                                                                                                          |
| $\text{MACRO}_2 + \text{HO}_2 \longrightarrow 0.6 \cdot \text{MACROOH} + 0.4 \cdot \text{CO} + 0.4 \cdot \text{HYAC} + 0.4 \cdot \text{HO}_2 + 0.4 \cdot \text{OH}$                                                                                                                                                                                            | $1.820 \cdot 10^{-13} \exp(1300./T)$                               |                                                                                                                                          |
| $\text{MACRO}_2 \longrightarrow \text{CO} + \text{HYAC} + \text{OH}$                                                                                                                                                                                                                                                                                           | $2.900 \cdot 10^7 \exp(-5297./T)$                                  | Isomerisation according to Crounse et al. (2012)                                                                                         |
| $\text{MACROOH} + \text{OH} \longrightarrow \text{CO} + \text{HYAC} + \text{OH} + \text{H}_2\text{O}$                                                                                                                                                                                                                                                          | $1.800 \cdot 10^{-11}$                                             |                                                                                                                                          |
| $\text{MACROH} + \text{OH} \longrightarrow \text{CO}_2 + \text{HYAC} + \text{HO}_2 + \text{H}_2\text{O}$                                                                                                                                                                                                                                                       | $1.800 \cdot 10^{-11}$                                             |                                                                                                                                          |
| $\text{MPAN} + \text{M} \longrightarrow \text{MCO}_3 + \text{NO}_2 + \text{M}$                                                                                                                                                                                                                                                                                 |                                                                    |                                                                                                                                          |
| $\text{MPAN} + \text{OH} \longrightarrow \text{CO} + \text{HYAC} + \text{NO}_2$                                                                                                                                                                                                                                                                                | $3.200 \cdot 10^{-11}$                                             | rate: Orlando et al. (2002)                                                                                                              |
| $\text{MACO}_2\text{H} + \text{OH} \longrightarrow \text{CH}_2\text{O} + \text{CH}_3\text{CO}_3 + \text{CO}_2 + \text{H}_2\text{O}$                                                                                                                                                                                                                            | $1.510 \cdot 10^{-11}$                                             | products should be pyruvic acid + $\text{CH}_2\text{O}$ + $\text{HO}_2$                                                                  |
| $\text{MACO}_3\text{H} + \text{OH} \longrightarrow \text{H}_2\text{O} + \text{MCO}_3$                                                                                                                                                                                                                                                                          | $1.870 \cdot 10^{-11}$                                             |                                                                                                                                          |
| $\text{MVK} + \text{OH} \longrightarrow \text{LHMKABO}_2$                                                                                                                                                                                                                                                                                                      | $4.130 \cdot 10^{-12} \exp(452./T)$                                |                                                                                                                                          |
| $\text{MVK} + \text{O}_3 \longrightarrow 0.85 \cdot \text{CH}_3\text{COCHO} + 0.85 \cdot \text{HCOOH} + 0.15 \cdot \text{CH}_3\text{CO}_3 + 0.15 \cdot \text{OH} + 0.15 \cdot \text{CO} + 0.15 \cdot \text{CH}_2\text{O}$                                                                                                                                      | $7.510 \cdot 10^{-16} \exp(-1521./T)$                              | products according to IUPAC (2006)                                                                                                       |
| $\text{LHMKABO}_2 + \text{CH}_3\text{O}_2 \longrightarrow 0.9 \cdot \text{CH}_2\text{O} + 0.35 \cdot \text{GLYALD} + 0.65 \cdot \text{HO}_2 + 0.35 \cdot \text{CH}_3\text{CO}_3 + 0.175 \cdot \text{BIACETOH} + 0.25 \cdot \text{CH}_3\text{OH} + 0.25 \cdot \text{MACROH} + 0.15 \cdot \text{CH}_3\text{COCHO} + 0.075 \cdot \text{CO}_2\text{H}_3\text{CHO}$ | $1.000 \cdot 10^{-12}$                                             | products: Tyndall (p.c.)                                                                                                                 |
| $\text{LHMKABO}_2 + \text{CH}_3\text{CO}_3 \longrightarrow 0.3 \cdot \text{CH}_3\text{COCHO} + 0.7 \cdot \text{GLYALD} + 0.7 \cdot \text{CH}_3\text{CO}_3 + 0.3 \cdot \text{CH}_2\text{O} + 0.3 \cdot \text{HO}_2 + \text{CH}_3\text{O}_2 + \text{CO}_2$                                                                                                       | $1.000 \cdot 10^{-11}$                                             |                                                                                                                                          |

Table S9: C4 oxidation (... continued)

| reaction                                                                                                                                                                                                                      | rate coefficient                                                   | reference                                                                                                               |
|-------------------------------------------------------------------------------------------------------------------------------------------------------------------------------------------------------------------------------|--------------------------------------------------------------------|-------------------------------------------------------------------------------------------------------------------------|
| $\text{LHMKABO}_2 + \text{HO}_2 \longrightarrow 0.34 \cdot \text{LHMKABOOH} + 0.66 \cdot \text{CH}_3\text{CO}_3 + 0.66 \cdot \text{OH} + 0.66 \cdot \text{GLYALD}$                                                            | $1.820 \cdot 10^{-13} \exp(1300./T)$                               | Praske et al. (2015)                                                                                                    |
| $\text{LHMKABO}_2 + \text{NO} \longrightarrow \text{NO}_2 + 0.3 \cdot \text{CH}_2\text{O} + 0.3 \cdot \text{CH}_3\text{COCHO} + 0.3 \cdot \text{HO}_2 + 0.7 \cdot \text{CH}_3\text{CO}_3 + 0.7 \cdot \text{GLYALD}$           | $2.438 \cdot 10^{-12} \exp(360./T)$                                | $A = 2.54 \cdot 10^{-12} \cdot 0.96$ ; 4% nitrate yield Praske et al. (2015)                                            |
| $\text{LHMKABO}_2 + \text{NO} \longrightarrow \text{MVKN}$                                                                                                                                                                    | $1.020 \cdot 10^{-13} \exp(360./T)$                                | $A = 2.54 \cdot 10^{-12} \cdot 0.04$ ; 4% nitrate yield Praske et al. (2015)                                            |
| $\text{LHMKABO}_2 + \text{NO}_3 \longrightarrow 0.3 \cdot \text{CH}_3\text{COCHO} + 0.7 \cdot \text{GLYALD} + 0.7 \cdot \text{CH}_3\text{CO}_3 + 0.3 \cdot \text{CH}_2\text{O} + 0.3 \cdot \text{HO}_2 + \text{NO}_2$         | $2.500 \cdot 10^{-12}$                                             |                                                                                                                         |
| $\text{MVKN} + \text{OH} \longrightarrow \text{CH}_3\text{COCHO} + \text{HO}_2 + \text{CO}_2 + \text{NO}_2 + \text{H}_2\text{O}$                                                                                              | $5.600 \cdot 10^{-12}$                                             | k from Paulot et al. (2009); simplified products                                                                        |
| $\text{MACRN} + \text{OH} \longrightarrow \text{CO}_2 + \text{HYAC} + \text{NO}_2 + \text{H}_2\text{O}$                                                                                                                       | $5.000 \cdot 10^{-11}$                                             | k from Paulot et al. (2009); simplified products                                                                        |
| $\text{LHMKABOOH} + \text{OH} \longrightarrow 0.3 \cdot \text{CO}_2\text{H}_3\text{CHO} + \text{OH} + \text{H}_2\text{O} + 0.7 \cdot \text{BIACETOH}$                                                                         | $4.500 \cdot 10^{-12}$                                             |                                                                                                                         |
| $\text{CO}_2\text{H}_3\text{CHO} + \text{OH} \longrightarrow \text{CO}_2\text{H}_3\text{CO}_3 + \text{H}_2\text{O}$                                                                                                           | $2.450 \cdot 10^{-11}$                                             |                                                                                                                         |
| $\text{CO}_2\text{H}_3\text{CHO} + \text{NO}_3 \longrightarrow \text{CO}_2\text{H}_3\text{CO}_3 + \text{HNO}_3$                                                                                                               | $5.760 \cdot 10^{-12} \exp(-1862./T)$                              |                                                                                                                         |
| $\text{CO}_2\text{H}_3\text{CO}_3 + \text{CH}_3\text{O}_2 \longrightarrow \text{CH}_3\text{COCHO} + 2 \cdot \text{HO}_2 + \text{CO}_2 + \text{CH}_2\text{O}$                                                                  | $1.000 \cdot 10^{-11}$                                             | products: Tyndall (p.c.)                                                                                                |
| $\text{CO}_2\text{H}_3\text{CO}_3 + \text{CH}_3\text{CO}_3 \longrightarrow \text{CH}_3\text{COCHO} + \text{HO}_2 + \text{CH}_3\text{O}_2 + 2 \cdot \text{CO}_2$                                                               | $1.000 \cdot 10^{-11}$                                             |                                                                                                                         |
| $\text{CO}_2\text{H}_3\text{CO}_3 + \text{HO}_2 \longrightarrow 0.6 \cdot \text{CO}_2\text{H}_3\text{CO}_3\text{H} + 0.4 \cdot \text{CO}_2 + 0.4 \cdot \text{OH} + 0.4 \cdot \text{HO}_2 + 0.4 \cdot \text{CH}_3\text{COCHO}$ | $4.300 \cdot 10^{-13} \exp(1040./T)$                               |                                                                                                                         |
| $\text{CO}_2\text{H}_3\text{CO}_3 + \text{NO} \longrightarrow \text{CH}_3\text{COCHO} + \text{HO}_2 + \text{NO}_2 + \text{CO}_2$                                                                                              | $8.100 \cdot 10^{-12} \exp(270./T)$                                |                                                                                                                         |
| $\text{CO}_2\text{H}_3\text{CO}_3 + \text{NO}_3 \longrightarrow \text{CH}_3\text{COCHO} + \text{HO}_2 + \text{NO}_2 + \text{CO}_2$                                                                                            | $4.000 \cdot 10^{-12}$                                             |                                                                                                                         |
| $\text{CO}_2\text{H}_3\text{CO}_3\text{H} + \text{OH} \longrightarrow \text{CO}_2\text{H}_3\text{CO}_3 + \text{H}_2\text{O}$                                                                                                  | $1.000 \cdot 10^{-12}$                                             | Orlando (p.c.)                                                                                                          |
| $\text{MALO}_2 + \text{NO}_2 + \text{M} \longrightarrow 0.8 \cdot \text{LC}_5\text{PAN}_{1719} + \text{M}$                                                                                                                    | $ktroe(2.700 \cdot 10^{-28}, 7.1, 1.200 \cdot 10^{-11}, 0.9, 0.6)$ | Orlando and Tyndall (2012) - Same as $k(\text{CH}_3\text{CO}_3 + \text{NO}_2)$ ; $\text{LC}_5\text{PAN}$ as a surrogate |
| $\text{MALO}_2 + \text{NO} \longrightarrow 0.4 \cdot \text{GLYOXAL} + \text{HO}_2 + 0.4 \cdot \text{CO} + 0.4 \cdot \text{CO}_2 + \text{NO}_2 + 0.6 \cdot \text{CO}_2\text{H}_3\text{CHO}$                                    | $7.500 \cdot 10^{-12} \exp(290./T)$                                | products: Tyndall (p.c.)                                                                                                |
| $\text{MALO}_2 + \text{HO}_2 \longrightarrow 0.16 \cdot \text{GLYOXAL} + \text{HO}_2 + 0.16 \cdot \text{CO} + 0.16 \cdot \text{CO}_2 + 0.16 \cdot \text{OH} + 0.84 \cdot \text{CO}_2\text{H}_3\text{CHO}$                     | $4.300 \cdot 10^{-13} \exp(1040./T)$                               |                                                                                                                         |
| $\text{MALO}_2 + \text{CH}_3\text{O}_2 \longrightarrow 0.4 \cdot \text{GLYOXAL} + 2 \cdot \text{HO}_2 + 0.4 \cdot \text{CO} + 0.4 \cdot \text{CO}_2 + 0.6 \cdot \text{CO}_2\text{H}_3\text{CHO} + \text{CH}_2\text{O}$        | $1.000 \cdot 10^{-12}$                                             | products: Tyndall (p.c.)                                                                                                |
| $\text{MALO}_2 + \text{CH}_3\text{CO}_3 \longrightarrow 0.4 \cdot \text{GLYOXAL} + \text{HO}_2 + 0.4 \cdot \text{CO} + 1.4 \cdot \text{CO}_2 + 0.6 \cdot \text{CO}_2\text{H}_3\text{CHO} + \text{CH}_3\text{O}_2$             | $1.000 \cdot 10^{-11}$                                             |                                                                                                                         |



Table S9: C4 oxidation (... continued)

| reaction                                                                                                                                                                                                                 | rate coefficient                                                   | reference                                                                                    |
|--------------------------------------------------------------------------------------------------------------------------------------------------------------------------------------------------------------------------|--------------------------------------------------------------------|----------------------------------------------------------------------------------------------|
| MDIALO <sub>2</sub> + HO <sub>2</sub> $\longrightarrow$ 0.4 · OH + 0.332 · HO <sub>2</sub> +<br>0.068 · CH <sub>3</sub> COCHO + 0.136 · CO + 0.068 · CH <sub>3</sub> O <sub>2</sub> +<br>0.068 · GLYOXAL                 | $4.300 \cdot 10^{-13} \exp(1040./T)$                               |                                                                                              |
| MDIALO <sub>2</sub> + NO $\longrightarrow$ NO <sub>2</sub> + 0.83 · HO <sub>2</sub> + 0.17 · CH <sub>3</sub> COCHO +<br>0.34 · CO + 0.17 · CH <sub>3</sub> O <sub>2</sub> + 0.17 · GLYOXAL                               | $7.500 \cdot 10^{-12} \exp(290./T)$                                |                                                                                              |
| MDIALO <sub>2</sub> + NO <sub>2</sub> + M $\longrightarrow$ M                                                                                                                                                            | $ktroe(2.700 \cdot 10^{-28}, 7.1, 1.200 \cdot 10^{-11}, 0.9, 0.6)$ | Orlando and Tyndall (2012); Same as<br>k(CH <sub>3</sub> CO <sub>3</sub> + NO <sub>2</sub> ) |
| MDIALO <sub>2</sub> + CH <sub>3</sub> O <sub>2</sub> $\longrightarrow$ 1.83 · HO <sub>2</sub> + 0.17 · CH <sub>3</sub> COCHO +<br>0.34 · CO + 0.17 · CH <sub>3</sub> O <sub>2</sub> + 0.17 · GLYOXAL + CH <sub>2</sub> O | $1.000 \cdot 10^{-12}$                                             |                                                                                              |
| MDIALO <sub>2</sub> + CH <sub>3</sub> CO <sub>3</sub> $\longrightarrow$ 0.83 · HO <sub>2</sub> + 0.17 · CH <sub>3</sub> COCHO +<br>0.34 · CO + 1.17 · CH <sub>3</sub> O <sub>2</sub> + 0.17 · GLYOXAL + CO <sub>2</sub>  | $1.000 \cdot 10^{-11}$                                             |                                                                                              |

Table S10: C5 oxidation

| reaction                                                                                                                                                                                                                                                                                                                                                                                                                                                                        | rate coefficient                      | reference                                                            |
|---------------------------------------------------------------------------------------------------------------------------------------------------------------------------------------------------------------------------------------------------------------------------------------------------------------------------------------------------------------------------------------------------------------------------------------------------------------------------------|---------------------------------------|----------------------------------------------------------------------|
| BIGALKANE + OH $\longrightarrow$ ALKO <sub>2</sub> + H <sub>2</sub> O                                                                                                                                                                                                                                                                                                                                                                                                           | $3.500 \cdot 10^{-12}$                |                                                                      |
| C <sub>5</sub> H <sub>8</sub> + OH $\longrightarrow$ 0.4 · LISOPACO <sub>2</sub> + 0.35 · ISOPBO <sub>2</sub> +<br>0.25 · ISOPDO <sub>2</sub>                                                                                                                                                                                                                                                                                                                                   | $2.700 \cdot 10^{-11} \exp(390./T)$   | Tyndall (p.c.); MCM3.2 has yields .25, .5, .25                       |
| C <sub>5</sub> H <sub>8</sub> + O <sub>3</sub> $\longrightarrow$ 0.051 · CH <sub>3</sub> O <sub>2</sub> + 0.1575 · CH <sub>3</sub> CO <sub>3</sub> +<br>0.054 · LHMVKABO <sub>2</sub> + 0.522 · CO + 0.068750 · HCOOH +<br>0.11 · H <sub>2</sub> O <sub>2</sub> + 0.324750 · MACR + 0.1275 · C <sub>3</sub> H <sub>6</sub> + 0.2625 · HO <sub>2</sub> +<br>0.255 · CO <sub>2</sub> + 0.749750 · CH <sub>2</sub> O + 0.041250 · MACO <sub>2</sub> H +<br>0.27 · OH + 0.244 · MVK | $7.860 \cdot 10^{-15} \exp(-1913./T)$ |                                                                      |
| C <sub>5</sub> H <sub>8</sub> + NO <sub>3</sub> $\longrightarrow$ NISOPO <sub>2</sub>                                                                                                                                                                                                                                                                                                                                                                                           | $3.030 \cdot 10^{-12} \exp(-446./T)$  |                                                                      |
| MBO + OH $\longrightarrow$ MBOO <sub>2</sub>                                                                                                                                                                                                                                                                                                                                                                                                                                    | $8.100 \cdot 10^{-12} \exp(610./T)$   |                                                                      |
| MBO + O <sub>3</sub> $\longrightarrow$ 0.35 · CO + 0.5 · CH <sub>2</sub> O + 0.1 · CH <sub>3</sub> COCH <sub>3</sub> +<br>0.9 · IBUTALOH + 0.25 · HCOOH + 0.06 · HO <sub>2</sub> + 0.06 · OH                                                                                                                                                                                                                                                                                    | $1.000 \cdot 10^{-17}$                |                                                                      |
| MBO + NO <sub>3</sub> $\longrightarrow$ MBONO <sub>3</sub> O <sub>2</sub>                                                                                                                                                                                                                                                                                                                                                                                                       | $4.600 \cdot 10^{-14} \exp(-400./T)$  |                                                                      |
| ALKO <sub>2</sub> + NO $\longrightarrow$ 0.4 · CH <sub>3</sub> CHO + 0.25 · CH <sub>2</sub> O +<br>0.25 · CH <sub>3</sub> COCH <sub>3</sub> + HO <sub>2</sub> + 0.8 · MEK + NO <sub>2</sub>                                                                                                                                                                                                                                                                                     | $3.780 \cdot 10^{-12} \exp(180./T)$   | $A = 4.200 \cdot 10^{-12} \cdot 0.9$ ; 10% ALKNO <sub>3</sub> -yield |
| ALKO <sub>2</sub> + NO $\longrightarrow$ ALKNO <sub>3</sub>                                                                                                                                                                                                                                                                                                                                                                                                                     | $4.200 \cdot 10^{-13} \exp(180./T)$   | 10% ALKNO <sub>3</sub> -yield                                        |
| ALKO <sub>2</sub> + HO <sub>2</sub> $\longrightarrow$ ALKOOH                                                                                                                                                                                                                                                                                                                                                                                                                    | $7.500 \cdot 10^{-13} \exp(700./T)$   |                                                                      |
| ALKO <sub>2</sub> + CH <sub>3</sub> O <sub>2</sub> $\longrightarrow$ 0.3 · CH <sub>3</sub> CHO + 1.1875 · CH <sub>2</sub> O +<br>0.1875 · CH <sub>3</sub> COCH <sub>3</sub> + 0.75 · HO <sub>2</sub> + 0.6 · MEK + 0.25 · ALKOH                                                                                                                                                                                                                                                 | $1.000 \cdot 10^{-12}$                |                                                                      |

Table S10: C5 oxidation (... continued)

| reaction                                                                                                                                                                                                                                      | rate coefficient                      | reference                                                                                                                                                                                                                                                                                                                                                |
|-----------------------------------------------------------------------------------------------------------------------------------------------------------------------------------------------------------------------------------------------|---------------------------------------|----------------------------------------------------------------------------------------------------------------------------------------------------------------------------------------------------------------------------------------------------------------------------------------------------------------------------------------------------------|
| $\text{ALKO}_2 + \text{CH}_3\text{CO}_3 \longrightarrow 0.4 \cdot \text{CH}_3\text{CHO} + 0.25 \cdot \text{CH}_2\text{O} + 0.25 \cdot \text{CH}_3\text{COCH}_3 + \text{HO}_2 + 0.8 \cdot \text{MEK} + \text{CH}_3\text{O}_2 + \text{CO}_2$    | $1.000 \cdot 10^{-11}$                |                                                                                                                                                                                                                                                                                                                                                          |
| $\text{ALKOOH} + \text{OH} \longrightarrow \text{ALKO}_2 + \text{H}_2\text{O}$                                                                                                                                                                | $3.800 \cdot 10^{-12} \exp(200./T)$   |                                                                                                                                                                                                                                                                                                                                                          |
| $\text{ALKOH} + \text{OH} \longrightarrow 1.25 \cdot \text{MEK} + \text{HO}_2 + \text{H}_2\text{O}$                                                                                                                                           | $5.000 \cdot 10^{-12}$                | Tyndall (p.c.), MEK yield to account for C                                                                                                                                                                                                                                                                                                               |
| $\text{ALKNO}_3 + \text{OH} \longrightarrow 0.4 \cdot \text{CH}_3\text{CHO} + 0.25 \cdot \text{CH}_2\text{O} + 0.25 \cdot \text{CH}_3\text{COCH}_3 + \text{HO}_2 + 0.8 \cdot \text{MEK} + \text{NO}_2$                                        | $2.000 \cdot 10^{-12}$                |                                                                                                                                                                                                                                                                                                                                                          |
| $\text{LISOPACO}_2 + \text{HO}_2 \longrightarrow \text{LISOPACOOH}$                                                                                                                                                                           | $2.050 \cdot 10^{-13} \exp(1300./T)$  | add OH channel                                                                                                                                                                                                                                                                                                                                           |
| $\text{LISOPACO}_2 + \text{NO} \longrightarrow \text{HO}_2 + 0.977 \cdot \text{LHC}_4\text{ACCHO} + \text{NO}_2 + 0.0277 \cdot \text{CH}_3\text{COCHO} + 0.0277 \cdot \text{GLYOXAL} + 0.0277 \cdot \text{HYAC} + 0.0277 \cdot \text{GLYALD}$ | $2.235 \cdot 10^{-12} \exp(360./T)$   | $A = 2.54 \cdot 10^{-12} \cdot 0.88$ ; average 12% nitrate yield from Paulot et al. (2009); Tyndall (p.c.); direct GLYOXAL channel from lab meas.                                                                                                                                                                                                        |
| $\text{LISOPACO}_2 + \text{NO} \longrightarrow \text{LISOPACNO}_3$                                                                                                                                                                            | $3.050 \cdot 10^{-13} \exp(360./T)$   | $A = 2.54 \cdot 10^{-12} \cdot 0.12$ ; average 12% nitrate yield from Paulot et al. (2009)                                                                                                                                                                                                                                                               |
| $\text{LISOPACO}_2 + \text{NO}_3 \longrightarrow \text{HO}_2 + \text{LHC}_4\text{ACCHO} + \text{NO}_2$                                                                                                                                        | $2.500 \cdot 10^{-12}$                |                                                                                                                                                                                                                                                                                                                                                          |
| $\text{LISOPACO}_2 + \text{CH}_3\text{O}_2 \longrightarrow 0.75 \cdot \text{CH}_2\text{O} + 0.75 \cdot \text{LHC}_4\text{ACCHO} + 0.25 \cdot \text{CH}_3\text{OH} + 0.25 \cdot \text{ISOPAOH} + \text{HO}_2$                                  | $2.400 \cdot 10^{-12}$                | products: Tyndall (p.c.)                                                                                                                                                                                                                                                                                                                                 |
| $\text{LISOPACO}_2 + \text{CH}_3\text{CO}_3 \longrightarrow \text{HO}_2 + \text{LHC}_4\text{ACCHO} + \text{CH}_3\text{O}_2 + \text{CO}_2$                                                                                                     | $1.000 \cdot 10^{-11}$                |                                                                                                                                                                                                                                                                                                                                                          |
| $\text{LISOPACO}_2 \longrightarrow \text{HO}_2 + \text{HPALD}$                                                                                                                                                                                | $4.1 \cdot 10^8 \exp(-7700./T)$       | Bulk isomerization rate constant for all ISOPO2 by Crounse et al. (2011)                                                                                                                                                                                                                                                                                 |
| $\text{ISOPBO}_2 \longrightarrow \text{HO}_2 + \text{HPALD}$                                                                                                                                                                                  | $4.1 \cdot 10^8 \exp(-7700./T)$       | see note of [LISOPACO2]                                                                                                                                                                                                                                                                                                                                  |
| $\text{ISOPDO}_2 \longrightarrow \text{HO}_2 + \text{HPALD}$                                                                                                                                                                                  | $4.1 \cdot 10^8 \exp(-7700./T)$       | see note of [LISOPACO2]                                                                                                                                                                                                                                                                                                                                  |
| $\text{LISOPACOOH} + \text{OH} \longrightarrow 0.415 \cdot \text{LIEPOX} + 0.415 \cdot \text{OH} + 0.415 \cdot \text{LISOPOOHO}_2 + 0.14 \cdot \text{LHC}_4\text{ACCHO} + 0.03 \cdot \text{H}_2\text{O} + 0.03 \cdot \text{LISOPACO}_2$       | $1.540 \cdot 10^{-10}$                | k from MCMv3.3.1 and OH-addition branching ratios estimated with site-specific SAR by Peeters et al. (2007) and H-abstraction channel assumed to be like the one for $\text{CH}_3\text{OOH} + \text{OH}$ reaction and abstraction from the alpha-hydroperoxyl allyl hydrogen estimated by SAR of MOM (Taraborrelli in prep.) being $2.12 \cdot 10^{-11}$ |
| $\text{ISOPAOH} + \text{OH} \longrightarrow \text{LISOPOOHO}_2$                                                                                                                                                                               | $9.300 \cdot 10^{-11}$                | OH-addition to double bond and products approximated with the one from $\text{ISOPOOH} + \text{OH}$ reaction leading to similar SOA precursors.                                                                                                                                                                                                          |
| $\text{LISOPACNO}_3 + \text{OH} \longrightarrow \text{LISOPNO}_3\text{O}_2$                                                                                                                                                                   | $6.000 \cdot 10^{-11}$                |                                                                                                                                                                                                                                                                                                                                                          |
| $\text{LIEPOX} + \text{OH} \longrightarrow 0.29 \cdot \text{IEC}_1\text{O}_2 + 0.71 \cdot \text{LIECHO} + 0.71 \cdot \text{HO}_2 + \text{H}_2\text{O}$                                                                                        | $1.500 \cdot 10^{-11}$                | MCM3.2                                                                                                                                                                                                                                                                                                                                                   |
| $\text{LIECHO} + \text{OH} \longrightarrow \text{H}_2\text{O} + \text{LIECO}_3$                                                                                                                                                               | $1.760 \cdot 10^{-11}$                | MCM3.2                                                                                                                                                                                                                                                                                                                                                   |
| $\text{LIECHO} + \text{NO}_3 \longrightarrow \text{HNO}_3 + \text{LIECO}_3$                                                                                                                                                                   | $1.050 \cdot 10^{-11} \exp(-1860./T)$ | MCM3.2                                                                                                                                                                                                                                                                                                                                                   |

Table S10: C5 oxidation (... continued)

| reaction                                                                                                                                                                                                                | rate coefficient                     | reference                                                                                                                                       |
|-------------------------------------------------------------------------------------------------------------------------------------------------------------------------------------------------------------------------|--------------------------------------|-------------------------------------------------------------------------------------------------------------------------------------------------|
| $\text{LIECO}_3 + \text{HO}_2 \longrightarrow 0.6 \cdot \text{LIECO}_3\text{H} + 0.4 \cdot \text{CO}_2 + 0.4 \cdot \text{OH} + 0.25 \cdot \text{LHMVKABO}_2 + 0.15 \cdot \text{MACRO}_2$                                | $5.200 \cdot 10^{-13} \exp(980./T)$  | MCM3.2                                                                                                                                          |
| $\text{LIECO}_3 + \text{NO} \longrightarrow 0.6 \cdot \text{LHMVKABO}_2 + 0.4 \cdot \text{MACRO}_2 + \text{NO}_2 + \text{CO}_2$                                                                                         | $7.500 \cdot 10^{-12} \exp(290./T)$  | MCM3.2                                                                                                                                          |
| $\text{LIECO}_3 + \text{NO}_3 \longrightarrow 0.6 \cdot \text{LHMVKABO}_2 + 0.4 \cdot \text{MACRO}_2 + \text{NO}_2 + \text{CO}_2$                                                                                       | $4.000 \cdot 10^{-12}$               | MCM3.2                                                                                                                                          |
| $\text{LIECO}_3\text{H} + \text{OH} \longrightarrow \text{H}_2\text{O} + \text{LIECO}_3$                                                                                                                                | $1.040 \cdot 10^{-11}$               | MCM3.2                                                                                                                                          |
| $\text{IEC}_1\text{O}_2 + \text{HO}_2 \longrightarrow \text{LIECO}_3\text{H}$                                                                                                                                           | $2.050 \cdot 10^{-13} \exp(1300./T)$ | MCM3.2 plus shortcut                                                                                                                            |
| $\text{IEC}_1\text{O}_2 + \text{NO} \longrightarrow \text{BIACETOH} + \text{NO}_2 + \text{CH}_2\text{O} + \text{HO}_2$                                                                                                  | $2.700 \cdot 10^{-12} \exp(360./T)$  | MCM3.2                                                                                                                                          |
| $\text{IEC}_1\text{O}_2 + \text{NO}_3 \longrightarrow \text{BIACETOH} + \text{NO}_2 + \text{CH}_2\text{O} + \text{HO}_2$                                                                                                | $2.300 \cdot 10^{-12}$               | MCM3.2                                                                                                                                          |
| $\text{ISOPBO}_2 + \text{HO}_2 \longrightarrow \text{ISOPBOOH}$                                                                                                                                                         | $2.050 \cdot 10^{-13} \exp(1300./T)$ |                                                                                                                                                 |
| $\text{ISOPBO}_2 + \text{NO} \longrightarrow \text{CH}_2\text{O} + \text{MVK} + \text{HO}_2 + \text{NO}_2$                                                                                                              | $2.235 \cdot 10^{-12} \exp(360./T)$  | $A = 2.54 \cdot 10^{-12} \cdot 0.88$ ; average 12% nitrate yield from Paulot et al. (2009);                                                     |
| $\text{ISOPBO}_2 + \text{NO} \longrightarrow \text{ISOPBNO}_3$                                                                                                                                                          | $3.050 \cdot 10^{-13} \exp(360./T)$  | $A = 2.54 \cdot 10^{-12} \cdot 0.12$ ; average 12% nitrate yield from Paulot et al. (2009);                                                     |
| $\text{ISOPBO}_2 + \text{NO}_3 \longrightarrow \text{CH}_2\text{O} + \text{MVK} + \text{HO}_2 + \text{NO}_2$                                                                                                            | $2.500 \cdot 10^{-12}$               |                                                                                                                                                 |
| $\text{ISOPBO}_2 + \text{CH}_3\text{O}_2 \longrightarrow 0.75 \cdot \text{MVK} + 1.75 \cdot \text{CH}_2\text{O} + 1.5 \cdot \text{HO}_2 + 0.25 \cdot \text{ISOPBOH}$                                                    | $8.000 \cdot 10^{-13}$               | products: Tyndall (p.c.)                                                                                                                        |
| $\text{ISOPBO}_2 + \text{CH}_3\text{CO}_3 \longrightarrow \text{CH}_2\text{O} + \text{MVK} + \text{HO}_2 + \text{CH}_3\text{O}_2 + \text{CO}_2$                                                                         | $1.000 \cdot 10^{-11}$               |                                                                                                                                                 |
| $\text{ISOPBOOH} + \text{OH} \longrightarrow 0.63 \cdot \text{LIEPOX} + 0.63 \cdot \text{OH} + 0.12 \cdot \text{LISOPOOHO}_2 + 0.15 \cdot \text{H}_2\text{O} + 0.15 \cdot \text{ISOPBO}_2$                              | $7.500 \cdot 10^{-11}$               | St. Clair et al. (2015)                                                                                                                         |
| $\text{ISOPBOH} + \text{OH} \longrightarrow \text{LISOPOOHO}_2$                                                                                                                                                         | $3.850 \cdot 10^{-11}$               | OH-addition to double bond and products approximated with the one from $\text{ISOPOOH} + \text{OH}$ reaction leading to similar SOA precursors. |
| $\text{ISOPBNO}_3 + \text{OH} \longrightarrow \text{LISOPNO}_3\text{O}_2$                                                                                                                                               | $1.360 \cdot 10^{-11}$               |                                                                                                                                                 |
| $\text{ISOPDO}_2 + \text{HO}_2 \longrightarrow \text{ISOPDOOH}$                                                                                                                                                         | $2.050 \cdot 10^{-13} \exp(1300./T)$ |                                                                                                                                                 |
| $\text{ISOPDO}_2 + \text{NO} \longrightarrow \text{CH}_2\text{O} + \text{MACR} + \text{HO}_2 + \text{NO}_2$                                                                                                             | $2.235 \cdot 10^{-12} \exp(360./T)$  | $A = 2.54 \cdot 10^{-12} \cdot 0.88$ ; average 12% nitrate yield from Paulot et al. (2009);                                                     |
| $\text{ISOPDO}_2 + \text{NO} \longrightarrow \text{ISOPDNO}_3$                                                                                                                                                          | $3.050 \cdot 10^{-13} \exp(360./T)$  | $A = 2.54 \cdot 10^{-12} \cdot 0.12$ ; average 12% nitrate yield from Paulot et al. (2009);                                                     |
| $\text{ISOPDO}_2 + \text{NO}_3 \longrightarrow \text{CH}_2\text{O} + \text{MACR} + \text{HO}_2 + \text{NO}_2$                                                                                                           | $2.500 \cdot 10^{-12}$               |                                                                                                                                                 |
| $\text{ISOPDO}_2 + \text{CH}_3\text{O}_2 \longrightarrow 0.5 \cdot \text{MACR} + 1.25 \cdot \text{CH}_2\text{O} + \text{HO}_2 + 0.25 \cdot \text{CH}_3\text{OH} + 0.25 \cdot \text{HCOC}_5 + 0.25 \cdot \text{ISOPDOH}$ | $2.900 \cdot 10^{-12}$               | products: Tyndall (p.c.)                                                                                                                        |
| $\text{ISOPDO}_2 + \text{CH}_3\text{CO}_3 \longrightarrow \text{CH}_2\text{O} + \text{MACR} + \text{HO}_2 + \text{CH}_3\text{O}_2 + \text{CO}_2$                                                                        | $1.000 \cdot 10^{-11}$               |                                                                                                                                                 |

Table S10: C5 oxidation (... continued)

| reaction                                                                                                                                                                                                                                                                               | rate coefficient                      | reference                                                                                                                               |
|----------------------------------------------------------------------------------------------------------------------------------------------------------------------------------------------------------------------------------------------------------------------------------------|---------------------------------------|-----------------------------------------------------------------------------------------------------------------------------------------|
| ISOPDOOH + OH $\longrightarrow$ 0.79 · LIEPOX + 0.79 · OH +<br>0.14 · LISOPOOHO <sub>2</sub> + 0.07 · H <sub>2</sub> O + 0.07 · ISOPDO <sub>2</sub>                                                                                                                                    | $1.180 \cdot 10^{-10}$                | St. Clair et al. (2015)                                                                                                                 |
| ISOPDOH + OH $\longrightarrow$ LISOPOOHO <sub>2</sub>                                                                                                                                                                                                                                  | $7.380 \cdot 10^{-11}$                | OH-addition to double bond and products approximated<br>with the one from ISOPOOH + OH reaction leading to sim-<br>ilar SOA precursors. |
| ISOPDNO <sub>3</sub> + OH $\longrightarrow$ LISOPNO <sub>3</sub> O <sub>2</sub>                                                                                                                                                                                                        | $6.100 \cdot 10^{-11}$                | OH-addition to double bond                                                                                                              |
| NISOP <sub>2</sub> + HO <sub>2</sub> $\longrightarrow$ NISOPOOH                                                                                                                                                                                                                        | $2.050 \cdot 10^{-13} \exp(1300./T)$  |                                                                                                                                         |
| NISOP <sub>2</sub> + NO $\longrightarrow$ HO <sub>2</sub> + NC <sub>4</sub> CHO + NO <sub>2</sub>                                                                                                                                                                                      | $2.540 \cdot 10^{-12} \exp(360./T)$   |                                                                                                                                         |
| NISOP <sub>2</sub> + NO <sub>3</sub> $\longrightarrow$ HO <sub>2</sub> + NC <sub>4</sub> CHO + NO <sub>2</sub>                                                                                                                                                                         | $2.500 \cdot 10^{-12}$                |                                                                                                                                         |
| NISOP <sub>2</sub> + CH <sub>3</sub> O <sub>2</sub> $\longrightarrow$ 0.75 · CH <sub>2</sub> O + 0.75 · NC <sub>4</sub> CHO + HO <sub>2</sub> +<br>0.25 · CH <sub>3</sub> OH + 0.25 · LISOPACNO <sub>3</sub>                                                                           | $1.300 \cdot 10^{-12}$                | products: Tyndall (p.c.)                                                                                                                |
| NISOP <sub>2</sub> + CH <sub>3</sub> CO <sub>3</sub> $\longrightarrow$ HO <sub>2</sub> + NC <sub>4</sub> CHO + CH <sub>3</sub> O <sub>2</sub> + CO <sub>2</sub>                                                                                                                        | $1.000 \cdot 10^{-11}$                |                                                                                                                                         |
| NISOPOOH + OH $\longrightarrow$ NC <sub>4</sub> CHO + OH + H <sub>2</sub> O                                                                                                                                                                                                            | $1.030 \cdot 10^{-10}$                |                                                                                                                                         |
| NC <sub>4</sub> CHO + OH $\longrightarrow$ H <sub>2</sub> O + LNISO <sub>3</sub>                                                                                                                                                                                                       | $4.160 \cdot 10^{-11}$                |                                                                                                                                         |
| NC <sub>4</sub> CHO + O <sub>3</sub> $\longrightarrow$ 0.445 · NO <sub>2</sub> + 0.89 · CO + 0.075625 · H <sub>2</sub> O <sub>2</sub> +<br>0.034375 · HCOCO <sub>2</sub> H + 0.555 · NOA + 0.445 · HO <sub>2</sub> +<br>0.520625 · GLYOXAL + 0.89 · OH + 0.445 · CH <sub>3</sub> COCHO | $2.400 \cdot 10^{-17}$                |                                                                                                                                         |
| NC <sub>4</sub> CHO + NO <sub>3</sub> $\longrightarrow$ HNO <sub>3</sub> + LNISO <sub>3</sub>                                                                                                                                                                                          | $6.120 \cdot 10^{-12} \exp(-1862./T)$ |                                                                                                                                         |
| LNISO <sub>3</sub> + HO <sub>2</sub> $\longrightarrow$ 0.8 · LNISOOH + 0.2 · NOA + 0.2 · OH +<br>0.2 · CO <sub>2</sub> + 0.2 · CO + 0.2 · HO <sub>2</sub>                                                                                                                              | $1.930 \cdot 10^{-13} \exp(1300./T)$  | products: Tyndall (p.c.)                                                                                                                |
| LNISO <sub>3</sub> + NO $\longrightarrow$ NOA + 0.5 · GLYOXAL + 0.5 · CO + HO <sub>2</sub> +<br>NO <sub>2</sub> + 0.5 · CO <sub>2</sub>                                                                                                                                                | $4.270 \cdot 10^{-12} \exp(360./T)$   |                                                                                                                                         |
| LNISO <sub>3</sub> + NO <sub>3</sub> $\longrightarrow$ NOA + 0.5 · GLYOXAL + 0.5 · CO + HO <sub>2</sub> +<br>NO <sub>2</sub> + 0.5 · CO <sub>2</sub>                                                                                                                                   | $3.302 \cdot 10^{-12} \exp(360./T)$   |                                                                                                                                         |
| LNISO <sub>3</sub> + CH <sub>3</sub> O <sub>2</sub> $\longrightarrow$ 0.375 · GLYOXAL + 0.875 · NOA +<br>CH <sub>2</sub> O + 1.75 · HO <sub>2</sub> + 0.625 · CO <sub>2</sub> + 0.0625 · MACRN +<br>0.0625 · MVKN + 0.5 · CO                                                           | $1.000 \cdot 10^{-12}$                | products: Tyndall (p.c.)                                                                                                                |
| LNISO <sub>3</sub> + CH <sub>3</sub> CO <sub>3</sub> $\longrightarrow$ NOA + 0.5 · GLYOXAL + 0.5 · CO +<br>HO <sub>2</sub> + CH <sub>3</sub> O <sub>2</sub> + 1.5 · CO <sub>2</sub>                                                                                                    | $1.000 \cdot 10^{-11}$                |                                                                                                                                         |
| LNISOOH + OH $\longrightarrow$ H <sub>2</sub> O + LNISO <sub>3</sub>                                                                                                                                                                                                                   | $2.650 \cdot 10^{-11}$                |                                                                                                                                         |
| LHC <sub>4</sub> ACCHO + OH $\longrightarrow$ 0.52 · LC <sub>578</sub> O <sub>2</sub> + 0.48 · LHC <sub>4</sub> ACCO <sub>3</sub> +<br>H <sub>2</sub> O                                                                                                                                | $4.520 \cdot 10^{-11}$                |                                                                                                                                         |

Table S10: C5 oxidation (... continued)

| reaction                                                                                                                                                                                                                                                                                                                                                                                                                                                                                  | rate coefficient                      | reference                |
|-------------------------------------------------------------------------------------------------------------------------------------------------------------------------------------------------------------------------------------------------------------------------------------------------------------------------------------------------------------------------------------------------------------------------------------------------------------------------------------------|---------------------------------------|--------------------------|
| $\text{LHC}_4\text{ACCHO} + \text{O}_3 \longrightarrow 0.2225 \cdot \text{CH}_3\text{CO}_3 +$<br>$0.89 \cdot \text{CO} + 0.017188 \cdot \text{HOCH}_2\text{CO}_2\text{H} + 0.075625 \cdot \text{H}_2\text{O}_2 +$<br>$0.017188 \cdot \text{HCOCO}_2\text{H} + 0.2775 \cdot \text{HYAC} + 0.6675 \cdot \text{HO}_2 +$<br>$0.260313 \cdot \text{GLYOXAL} + 0.2225 \cdot \text{CH}_2\text{O} + 0.89 \cdot \text{OH} +$<br>$0.260313 \cdot \text{GLYALD} + 0.5 \cdot \text{CH}_3\text{COCHO}$ | $2.400 \cdot 10^{-17}$                |                          |
| $\text{LHC}_4\text{ACCHO} + \text{NO}_3 \longrightarrow \text{HNO}_3 + \text{LHC}_4\text{ACCO}_3$                                                                                                                                                                                                                                                                                                                                                                                         | $6.120 \cdot 10^{-12} \exp(-1862./T)$ |                          |
| $\text{LC}_{578}\text{O}_2 + \text{NO} \longrightarrow 0.25 \cdot \text{CH}_3\text{COCHO} + 0.25 \cdot \text{GLYALD} +$<br>$0.25 \cdot \text{GLYOXAL} + 0.25 \cdot \text{HYAC} + 0.25 \cdot \text{CO} + 0.25 \cdot \text{MACROH} +$<br>$0.25 \cdot \text{CH}_2\text{O} + 0.25 \cdot \text{CO}_2\text{H}_3\text{CHO} + \text{HO}_2 + \text{NO}_2$                                                                                                                                          | $2.540 \cdot 10^{-12} \exp(360./T)$   | products: Tyndall (p.c.) |
| $\text{LC}_{578}\text{O}_2 + \text{NO}_3 \longrightarrow 0.25 \cdot \text{CH}_3\text{COCHO} + 0.25 \cdot \text{GLYALD} +$<br>$0.25 \cdot \text{GLYOXAL} + 0.25 \cdot \text{HYAC} + 0.25 \cdot \text{CO} + 0.25 \cdot \text{MACROH} +$<br>$0.25 \cdot \text{CH}_2\text{O} + 0.25 \cdot \text{CO}_2\text{H}_3\text{CHO} + \text{HO}_2 + \text{NO}_2$                                                                                                                                        | $2.500 \cdot 10^{-12}$                | products: Tyndall (p.c.) |
| $\text{LC}_{578}\text{O}_2 + \text{HO}_2 \longrightarrow \text{LC}_{578}\text{OOH}$                                                                                                                                                                                                                                                                                                                                                                                                       | $2.050 \cdot 10^{-13} \exp(1300./T)$  | add OH channel           |
| $\text{LC}_{578}\text{O}_2 + \text{CH}_3\text{O}_2 \longrightarrow 0.156250 \cdot \text{CH}_3\text{COCHO} +$<br>$0.156250 \cdot \text{GLYALD} + 0.156250 \cdot \text{GLYOXAL} + 0.156250 \cdot \text{HYAC} +$<br>$0.156250 \cdot \text{CO} + 0.468750 \cdot \text{MACROH} + 1.031250 \cdot \text{CH}_2\text{O} +$<br>$0.3125 \cdot \text{CO}_2\text{H}_3\text{CHO} + 1.25 \cdot \text{HO}_2 + 0.125 \cdot \text{CH}_3\text{OH}$                                                           | $1.000 \cdot 10^{-12}$                | products: Tyndall (p.c.) |
| $\text{LC}_{578}\text{O}_2 + \text{CH}_3\text{CO}_3 \longrightarrow 0.25 \cdot \text{CH}_3\text{COCHO} + 0.25 \cdot \text{GLYALD} +$<br>$0.25 \cdot \text{GLYOXAL} + 0.25 \cdot \text{HYAC} + 0.25 \cdot \text{CO} + 0.25 \cdot \text{MACROH} +$<br>$0.25 \cdot \text{CH}_2\text{O} + 0.25 \cdot \text{CO}_2\text{H}_3\text{CHO} + \text{CH}_3\text{O}_2 + \text{CO}_2$                                                                                                                   | $1.000 \cdot 10^{-11}$                |                          |
| $\text{LC}_{578}\text{OOH} + \text{OH} \longrightarrow \text{H}_2\text{O} + \text{LC}_{578}\text{O}_2$                                                                                                                                                                                                                                                                                                                                                                                    | $3.160 \cdot 10^{-11}$                |                          |
| $\text{LHC}_4\text{ACCO}_3 \longrightarrow \text{HO}_2 + \text{PACALD}$                                                                                                                                                                                                                                                                                                                                                                                                                   | $4.1 \cdot 10^8 \exp(-7700./T)$       | see note of [LISOPACO2]  |
| $\text{LHC}_4\text{ACCO}_3 + \text{CH}_3\text{O}_2 \longrightarrow \text{CH}_2\text{O} + 0.1 \cdot \text{LHC}_4\text{ACCO}_2\text{H} +$<br>$0.45 \cdot \text{GLYALD} + 0.45 \cdot \text{HYAC} + 0.45 \cdot \text{CH}_3\text{CO}_3 + 0.45 \cdot \text{CO} +$<br>$0.45 \cdot \text{HO}_2 + 0.9 \cdot \text{CO}_2$                                                                                                                                                                           | $1.000 \cdot 10^{-11}$                | products: Tyndall (p.c.) |
| $\text{LHC}_4\text{ACCO}_3 + \text{CH}_3\text{CO}_3 \longrightarrow 0.5 \cdot \text{HYAC} + 0.5 \cdot \text{GLYALD} +$<br>$0.5 \cdot \text{CH}_3\text{CO}_3 + 0.5 \cdot \text{CO} + 0.5 \cdot \text{HO}_2 + \text{CH}_3\text{O}_2 + 2 \cdot \text{CO}_2$                                                                                                                                                                                                                                  | $1.000 \cdot 10^{-11}$                |                          |
| $\text{LHC}_4\text{ACCO}_3 + \text{HO}_2 \longrightarrow 0.4 \cdot \text{LHC}_4\text{ACCO}_3\text{H} +$<br>$0.2 \cdot \text{LHC}_4\text{ACCO}_2\text{H} + 0.2 \cdot \text{O}_3 + 0.4 \cdot \text{CO}_2 + 0.4 \cdot \text{OH} +$<br>$0.2 \cdot \text{HYAC} + 0.2 \cdot \text{GLYALD} + 0.2 \cdot \text{CH}_3\text{CO}_3 + 0.2 \cdot \text{CO} +$<br>$0.2 \cdot \text{HO}_2$                                                                                                                | $4.300 \cdot 10^{-13} \exp(1040./T)$  |                          |
| $\text{LHC}_4\text{ACCO}_3 + \text{NO} \longrightarrow 0.5 \cdot \text{HYAC} + 0.5 \cdot \text{GLYALD} +$<br>$0.5 \cdot \text{CH}_3\text{CO}_3 + 0.5 \cdot \text{CO} + 0.5 \cdot \text{HO}_2 + \text{NO}_2 + \text{CO}_2$                                                                                                                                                                                                                                                                 | $8.100 \cdot 10^{-12} \exp(270./T)$   |                          |
| $\text{LHC}_4\text{ACCO}_3 + \text{NO}_3 \longrightarrow 0.5 \cdot \text{HYAC} + 0.5 \cdot \text{GLYALD} +$<br>$0.5 \cdot \text{CH}_3\text{CO}_3 + 0.5 \cdot \text{CO} + 0.5 \cdot \text{HO}_2 + \text{NO}_2 + \text{CO}_2$                                                                                                                                                                                                                                                               | $4.000 \cdot 10^{-12}$                |                          |

Table S10: C5 oxidation (... continued)

| reaction                                                                                                                                                                                                                                                                 | rate coefficient                                                   | reference                                                                                             |
|--------------------------------------------------------------------------------------------------------------------------------------------------------------------------------------------------------------------------------------------------------------------------|--------------------------------------------------------------------|-------------------------------------------------------------------------------------------------------|
| $\text{LHC}_4\text{ACCO}_3 + \text{NO}_2 + \text{M} \longrightarrow \text{LC}_5\text{PAN}_{1719} + \text{M}$                                                                                                                                                             | $ktroe(2.700 \cdot 10^{-28}, 7.1, 1.200 \cdot 10^{-11}, 0.9, 0.3)$ |                                                                                                       |
| $\text{LHC}_4\text{ACCO}_2\text{H} + \text{OH} \longrightarrow 0.5 \cdot \text{HYAC} + 0.5 \cdot \text{GLYALD} + 0.5 \cdot \text{CH}_3\text{CO}_3 + 0.5 \cdot \text{CO} + 0.5 \cdot \text{HO}_2 + \text{CO}_2 + \text{H}_2\text{O}$                                      | $2.520 \cdot 10^{-11}$                                             |                                                                                                       |
| $\text{LHC}_4\text{ACCO}_3\text{H} + \text{OH} \longrightarrow \text{H}_2\text{O} + \text{LHC}_4\text{ACCO}_3$                                                                                                                                                           | $2.880 \cdot 10^{-11}$                                             |                                                                                                       |
| $\text{LC}_5\text{PAN}_{1719} + \text{M} \longrightarrow \text{LHC}_4\text{ACCO}_3 + \text{NO}_2 + \text{M}$                                                                                                                                                             |                                                                    | $k_0 = 4.9 \cdot 10^{-3} \exp(-12100./T) * M, k_{inf} = 5.4 \cdot 10^{16} \exp(-13830./T), f_c = 0.3$ |
| $\text{LC}_5\text{PAN}_{1719} + \text{OH} \longrightarrow \text{CO} + \text{MACROH} + \text{NO}_2$                                                                                                                                                                       | $2.520 \cdot 10^{-11}$                                             |                                                                                                       |
| $\text{HCOC}_5 + \text{OH} \longrightarrow \text{C}_{59}\text{O}_2$                                                                                                                                                                                                      | $3.810 \cdot 10^{-11}$                                             |                                                                                                       |
| $\text{C}_{59}\text{O}_2 + \text{CH}_3\text{O}_2 \longrightarrow 0.75 \cdot \text{HOCH}_2\text{CO}_3 + 0.75 \cdot \text{HYAC} + \text{CH}_2\text{O} + 0.75 \cdot \text{HO}_2 + 0.3125 \cdot \text{MACROH}$                                                               | $1.000 \cdot 10^{-12}$                                             | Tyndall (p.c.)                                                                                        |
| $\text{C}_{59}\text{O}_2 + \text{CH}_3\text{CO}_3 \longrightarrow \text{HOCH}_2\text{CO}_3 + \text{HYAC} + \text{CH}_3\text{O}_2 + \text{CO}_2$                                                                                                                          | $1.000 \cdot 10^{-11}$                                             |                                                                                                       |
| $\text{C}_{59}\text{O}_2 + \text{NO} \longrightarrow \text{HOCH}_2\text{CO}_3 + \text{HYAC} + \text{NO}_2$                                                                                                                                                               | $2.540 \cdot 10^{-12} \exp(360./T)$                                |                                                                                                       |
| $\text{C}_{59}\text{O}_2 + \text{NO}_3 \longrightarrow \text{HOCH}_2\text{CO}_3 + \text{HYAC} + \text{NO}_2$                                                                                                                                                             | $2.500 \cdot 10^{-12}$                                             |                                                                                                       |
| $\text{C}_{59}\text{O}_2 + \text{HO}_2 \longrightarrow \text{C}_{59}\text{OOH}$                                                                                                                                                                                          | $2.050 \cdot 10^{-13} \exp(1300./T)$                               |                                                                                                       |
| $\text{C}_{59}\text{OOH} + \text{OH} \longrightarrow \text{C}_{59}\text{O}_2 + \text{H}_2\text{O}$                                                                                                                                                                       | $9.700 \cdot 10^{-12}$                                             |                                                                                                       |
| $\text{MBOO}_2 + \text{NO} \longrightarrow \text{HO}_2 + 0.67 \cdot \text{CH}_3\text{COCH}_3 + 0.67 \cdot \text{GLYALD} + 0.33 \cdot \text{CH}_2\text{O} + 0.33 \cdot \text{IBUTALOH} + \text{NO}_2$                                                                     | $2.600 \cdot 10^{-12} \exp(365./T)$                                |                                                                                                       |
| $\text{MBOO}_2 + \text{CH}_3\text{O}_2 \longrightarrow 0.9165 \cdot \text{CH}_2\text{O} + 0.625 \cdot \text{MACROH} + 0.25 \cdot \text{CH}_3\text{OH} + \text{HO}_2 + 0.3335 \cdot \text{CH}_3\text{COCH}_3 + 0.3335 \cdot \text{GLYALD} + 0.1665 \cdot \text{IBUTALOH}$ | $3.750 \cdot 10^{-13} \exp(-40./T)$                                |                                                                                                       |
| $\text{MBOO}_2 + \text{CH}_3\text{CO}_3 \longrightarrow 0.67 \cdot \text{CH}_3\text{COCH}_3 + 0.67 \cdot \text{GLYALD} + 0.33 \cdot \text{CH}_2\text{O} + 0.33 \cdot \text{IBUTALOH} + \text{HO}_2 + \text{CH}_3\text{O}_2 + \text{CO}_2$                                | $1.000 \cdot 10^{-11}$                                             |                                                                                                       |
| $\text{MBOO}_2 + \text{HO}_2 \longrightarrow \text{MBOOOH}$                                                                                                                                                                                                              | $7.500 \cdot 10^{-13} \exp(700./T)$                                |                                                                                                       |
| $\text{MBOOOH} + \text{OH} \longrightarrow 0.5 \cdot \text{MBOO}_2 + 0.625 \cdot \text{MACROH} + 0.5 \cdot \text{OH} + \text{H}_2\text{O}$                                                                                                                               | $3.800 \cdot 10^{-12} \exp(200./T)$                                |                                                                                                       |
| $\text{IBUTALOH} + \text{OH} \longrightarrow \text{H}_2\text{O} + \text{IBUTALOHO}_2$                                                                                                                                                                                    | $1.400 \cdot 10^{-11}$                                             |                                                                                                       |
| $\text{IBUTALOHO}_2 + \text{NO} \longrightarrow \text{CO}_2 + \text{NO}_2 + \text{HO}_2 + \text{CH}_3\text{COCH}_3$                                                                                                                                                      | $2.600 \cdot 10^{-12} \exp(365./T)$                                |                                                                                                       |
| $\text{IBUTALOHO}_2 + \text{HO}_2 \longrightarrow 0.6 \cdot \text{IBUTALOHOOH} + 0.4 \cdot \text{HO}_2 + 0.4 \cdot \text{OH} + 0.4 \cdot \text{CH}_3\text{COCH}_3 + 0.4 \cdot \text{CO}_2$                                                                               | $4.300 \cdot 10^{-13} \exp(1040./T)$                               |                                                                                                       |
| $\text{IBUTALOHO}_2 + \text{CH}_3\text{O}_2 \longrightarrow \text{CH}_3\text{COCH}_3 + 2 \cdot \text{HO}_2 + \text{CO}_2 + \text{CH}_2\text{O}$                                                                                                                          | $1.000 \cdot 10^{-12}$                                             | products: Tyndall (p.c.)                                                                              |
| $\text{IBUTALOHO}_2 + \text{CH}_3\text{CO}_3 \longrightarrow \text{CH}_3\text{COCH}_3 + \text{HO}_2 + \text{CH}_3\text{O}_2 + 2 \cdot \text{CO}_2$                                                                                                                       | $1.000 \cdot 10^{-11}$                                             |                                                                                                       |
| $\text{IBUTALOHOOH} + \text{OH} \longrightarrow \text{H}_2\text{O} + \text{IBUTALOHO}_2$                                                                                                                                                                                 | $1.000 \cdot 10^{-12}$                                             | Tyndall (p.c.)                                                                                        |

Table S10: C5 oxidation (... continued)

| reaction                                                                                                                                                                                                                                                                                                              | rate coefficient                                                   | reference                                                                                                                                                                                 |
|-----------------------------------------------------------------------------------------------------------------------------------------------------------------------------------------------------------------------------------------------------------------------------------------------------------------------|--------------------------------------------------------------------|-------------------------------------------------------------------------------------------------------------------------------------------------------------------------------------------|
| $\text{MBONO}_3\text{O}_2 + \text{HO}_2 \longrightarrow$                                                                                                                                                                                                                                                              | $4.300 \cdot 10^{-13} \exp(1040./T)$                               |                                                                                                                                                                                           |
| $\text{MBONO}_3\text{O}_2 + \text{NO} \longrightarrow 0.25 \cdot \text{CH}_2\text{O} + 0.25 \cdot \text{IBUTALOH} + 1.25 \cdot \text{NO}_2 + 0.500250 \cdot \text{NOA} + 0.75 \cdot \text{CH}_3\text{COCH}_3 + 0.75 \cdot \text{HO}_2$                                                                                | $2.600 \cdot 10^{-12} \exp(365./T)$                                |                                                                                                                                                                                           |
| $\text{MBONO}_3\text{O}_2 + \text{NO}_3 \longrightarrow 0.25 \cdot \text{CH}_2\text{O} + 0.25 \cdot \text{IBUTALOH} + 1.25 \cdot \text{NO}_2 + 0.500250 \cdot \text{NOA} + 0.75 \cdot \text{CH}_3\text{COCH}_3 + 0.75 \cdot \text{HO}_2$                                                                              | $2.400 \cdot 10^{-12}$                                             |                                                                                                                                                                                           |
| $\text{MBONO}_3\text{O}_2 + \text{CH}_3\text{O}_2 \longrightarrow 0.875 \cdot \text{CH}_2\text{O} + 0.125 \cdot \text{IBUTALOH} + 0.125 \cdot \text{NO}_2 + 0.250125 \cdot \text{NOA} + 0.375 \cdot \text{CH}_3\text{COCH}_3 + 0.875 \cdot \text{HO}_2 + 0.25 \cdot \text{CH}_3\text{OH} + 0.625 \cdot \text{MACROH}$ | $1.000 \cdot 10^{-12}$                                             | Tyndall (p.c.)                                                                                                                                                                            |
| $\text{MBONO}_3\text{O}_2 + \text{CH}_3\text{CO}_3 \longrightarrow 0.25 \cdot \text{CH}_2\text{O} + 0.25 \cdot \text{IBUTALOH} + 0.25 \cdot \text{NO}_2 + 0.500250 \cdot \text{NOA} + 0.75 \cdot \text{CH}_3\text{COCH}_3 + 0.75 \cdot \text{HO}_2 + \text{CH}_3\text{O}_2 + \text{CO}_2$                             | $1.000 \cdot 10^{-11}$                                             |                                                                                                                                                                                           |
| $\text{DICARBO}_2 + \text{HO}_2 \longrightarrow 0.4 \cdot \text{OH} + 0.068 \cdot \text{CH}_3\text{COCHO} + 0.068 \cdot \text{HO}_2 + 0.068 \cdot \text{CO} + 0.4 \cdot \text{CO}_2 + 0.332 \cdot \text{CH}_3\text{CO}_3 + 0.332 \cdot \text{GLYOXAL}$                                                                | $4.300 \cdot 10^{-13} \exp(1040./T)$                               |                                                                                                                                                                                           |
| $\text{DICARBO}_2 + \text{NO} \longrightarrow 0.17 \cdot \text{CH}_3\text{COCHO} + 0.17 \cdot \text{HO}_2 + 0.17 \cdot \text{CO} + \text{CO}_2 + 0.83 \cdot \text{CH}_3\text{CO}_3 + 0.83 \cdot \text{GLYOXAL} + \text{NO}_2$                                                                                         | $7.500 \cdot 10^{-12} \exp(290./T)$                                |                                                                                                                                                                                           |
| $\text{DICARBO}_2 + \text{NO}_2 + \text{M} \longrightarrow \text{M}$                                                                                                                                                                                                                                                  | $ktroe(2.700 \cdot 10^{-28}, 7.1, 1.200 \cdot 10^{-11}, 0.9, 0.6)$ | Orlando and Tyndall (2012), Same as $k(\text{CH}_3\text{CO}_3 + \text{NO}_2)$                                                                                                             |
| $\text{DICARBO}_2 + \text{CH}_3\text{O}_2 \longrightarrow 0.17 \cdot \text{CH}_3\text{COCHO} + 1.17 \cdot \text{HO}_2 + 0.17 \cdot \text{CO} + \text{CO}_2 + 0.83 \cdot \text{CH}_3\text{CO}_3 + 0.83 \cdot \text{GLYOXAL} + \text{CH}_2\text{O}$                                                                     | $1.000 \cdot 10^{-12}$                                             |                                                                                                                                                                                           |
| $\text{DICARBO}_2 + \text{CH}_3\text{CO}_3 \longrightarrow 0.17 \cdot \text{CH}_3\text{COCHO} + 0.17 \cdot \text{HO}_2 + 0.17 \cdot \text{CO} + 2 \cdot \text{CO}_2 + 0.83 \cdot \text{CH}_3\text{CO}_3 + 0.83 \cdot \text{GLYOXAL} + \text{CH}_3\text{O}_2$                                                          | $1.000 \cdot 10^{-11}$                                             |                                                                                                                                                                                           |
| $\text{HPALD} + \text{OH} \longrightarrow 0.641 \cdot \text{OH} + 0.385 \cdot \text{PACALD} + 0.256 \cdot \text{BIGALD}_3 + 0.359 \cdot \text{CH}_3\text{COCHO} + 0.359 \cdot \text{GLYOX} + 0.359 \cdot \text{HO}_2$                                                                                                 | $5.200 \cdot 10^{-11}$                                             | simplification of chemistry in MCMv3.3.1                                                                                                                                                  |
| $\text{PACALD} + \text{OH} \longrightarrow \text{CH}_3\text{COCHO} + \text{HCOCO}_3\text{H} + \text{HO}_2$                                                                                                                                                                                                            | $4.720 \cdot 10^{-11}$                                             | k and products for $\text{C}_5\text{PACALD}_2$ from MCMv3.3.1 assuming an implicit $\text{RO}_2 \longrightarrow \text{RO}$ conversion                                                     |
| $\text{LISOPOOHO}_2 + \text{HO}_2 \longrightarrow \text{LISOPOOHOOH}$                                                                                                                                                                                                                                                 | $2.050 \cdot 10^{-13} \exp(1300./T)$                               |                                                                                                                                                                                           |
| $\text{LISOPOOHO}_2 + \text{NO} \longrightarrow \text{CH}_2\text{O} + \text{HO}_2 + 0.5 \cdot \text{MACROOH} + 0.5 \cdot \text{LHMKABOOH} + \text{NO}_2$                                                                                                                                                              | $2.540 \cdot 10^{-12} \exp(360./T)$                                | $A = 2.54 \cdot 10^{-12} \cdot 0.12$ ; average 12% nitrate yield from Paulot et al. (2009); nitrate yield left for the moment equal to the one of the simple ISOPO2 (it should be higher) |
| $\text{LISOPOOHO}_2 + \text{NO} \longrightarrow \text{LISOPNO}_3\text{OOH}$                                                                                                                                                                                                                                           | $3.050 \cdot 10^{-13} \exp(360./T)$                                | $A = 2.54 \cdot 10^{-12} \cdot 0.12$ ; average 12% nitrate yield from Paulot et al. (2009); nitrate yield left for the moment equal to the one of the simple ISOPO2 (it should be higher) |

Table S10: C5 oxidation (... continued)

| reaction                                                                                                                                                                                                                   | rate coefficient                     | reference                                                                                                                                                                                                                                           |
|----------------------------------------------------------------------------------------------------------------------------------------------------------------------------------------------------------------------------|--------------------------------------|-----------------------------------------------------------------------------------------------------------------------------------------------------------------------------------------------------------------------------------------------------|
| $\text{LISOPOOHO}_2 + \text{NO}_3 \longrightarrow \text{CH}_2\text{O} + \text{HO}_2 + 0.5 \cdot \text{MACROOH} + 0.5 \cdot \text{LHMKABOOH} + \text{NO}_2$                                                                 | $2.500 \cdot 10^{-12}$               |                                                                                                                                                                                                                                                     |
| $\text{LISOPOOHO}_2 + \text{CH}_3\text{O}_2 \longrightarrow 1.5 \cdot \text{CH}_2\text{O} + 0.75 \cdot \text{HO}_2 + 0.375 \cdot \text{MACROOH} + 0.375 \cdot \text{LHMKABOOH} + 0.25 \cdot \text{LISOPOOHOOH}$            | $8.000 \cdot 10^{-13}$               |                                                                                                                                                                                                                                                     |
| $\text{LISOPOOHO}_2 + \text{CH}_3\text{CO}_3 \longrightarrow \text{CH}_2\text{O} + \text{HO}_2 + 0.5 \cdot \text{MACROOH} + 0.5 \cdot \text{LHMKABOOH} + \text{CH}_3\text{O}_2 + \text{CO}_2$                              | $1.000 \cdot 10^{-11}$               |                                                                                                                                                                                                                                                     |
| $\text{LISOPNO}_3\text{O}_2 + \text{HO}_2 \longrightarrow \text{LISOPNO}_3\text{OOH}$                                                                                                                                      | $2.050 \cdot 10^{-13} \exp(1300./T)$ |                                                                                                                                                                                                                                                     |
| $\text{LISOPNO}_3\text{O}_2 + \text{NO} \longrightarrow \text{CH}_2\text{O} + 0.5 \cdot \text{MACRN} + 0.5 \cdot \text{MVKN} + \text{HO}_2 + \text{NO}_2$                                                                  | $2.235 \cdot 10^{-12} \exp(360./T)$  | $A = 2.54 \cdot 10^{-12} \cdot 0.88$ ; average 12% nitrate yield from Paulot et al. (2009); nitrate yield left for the moment equal to the one of the simple ISOPO2 (it should be higher); previous $\text{RONO}_2$ split into 50% MACRN + 50% MVKN |
| $\text{LISOPNO}_3\text{O}_2 + \text{NO} \longrightarrow \text{LISOPNO}_3\text{NO}_3$                                                                                                                                       | $3.050 \cdot 10^{-13} \exp(360./T)$  | $A = 2.54 \cdot 10^{-12} \cdot 0.12$ ; average 12% nitrate yield from Paulot et al. (2009); nitrate yield left for the moment equal to the one of the simple ISOPO2 (it should be higher)                                                           |
| $\text{LISOPNO}_3\text{O}_2 + \text{NO}_3 \longrightarrow \text{CH}_2\text{O} + 0.5 \cdot \text{MACRN} + 0.5 \cdot \text{MVKN} + \text{HO}_2 + \text{NO}_2$                                                                | $2.500 \cdot 10^{-12}$               |                                                                                                                                                                                                                                                     |
| $\text{LISOPNO}_3\text{O}_2 + \text{CH}_3\text{O}_2 \longrightarrow 0.3525 \cdot \text{MACRN} + 0.3525 \cdot \text{MVKN} + 1.75 \cdot \text{CH}_2\text{O} + 1.5 \cdot \text{HO}_2 + 0.25 \cdot \text{LISOPNO}_3\text{OOH}$ | $8.000 \cdot 10^{-13}$               |                                                                                                                                                                                                                                                     |
| $\text{LISOPNO}_3\text{O}_2 + \text{CH}_3\text{CO}_3 \longrightarrow \text{CH}_2\text{O} + 0.5 \cdot \text{MACRN} + 0.5 \cdot \text{MVKN} + \text{HO}_2 + \text{CH}_3\text{O}_2 + \text{CO}_2$                             | $1.000 \cdot 10^{-11}$               |                                                                                                                                                                                                                                                     |
| $\text{LISOPOOHOOH} + \text{OH} \longrightarrow \text{H}_2\text{O} + \text{LISOPOOHO}_2$                                                                                                                                   | $7.600 \cdot 10^{-12} \exp(200./T)$  | twice the $k(\text{CH}_3\text{OOH} + \text{OH} \longrightarrow \text{CH}_3\text{O}_2)$                                                                                                                                                              |
| $\text{LISOPOOHOOH} + \text{OH} \longrightarrow \text{LC}_{578}\text{OOH} + \text{OH}$                                                                                                                                     | $2.104 \cdot 10^{-11}$               | $k$ for H-abstractions from SAR in MOM by a secondary carbon bearing a -OH group and a secondary and a tertiary carbon atoms bearing an -OOH group: $8.42 \cdot 10^{-13} \cdot 3.44 + (8.42 \cdot 10^{-13} + 1.75 \cdot 10^{-12}) \cdot 7$          |
| $\text{LISOPNO}_3\text{OOH} + \text{OH} \longrightarrow \text{H}_2\text{O} + \text{LISOPNO}_3\text{O}_2$                                                                                                                   | $3.800 \cdot 10^{-12} \exp(200./T)$  |                                                                                                                                                                                                                                                     |
| $\text{LISOPNO}_3\text{OOH} + \text{OH} \longrightarrow \text{C}_{59}\text{OOH} + \text{OH}$                                                                                                                               | $1.515 \cdot 10^{-11}$               | $k$ for H-abstractions from SAR in MOM by a secondary carbon bearing a -OH group and a tertiary carbon atom bearing an -OOH group: $8.42 \cdot 10^{-13} \cdot 3.44 + 1.75 \cdot 10^{-12} \cdot 7$                                                   |
| $\text{LISOPNO}_3\text{NO}_3 + \text{OH} \longrightarrow 0.5 \cdot \text{MACRN} + 0.5 \cdot \text{MVKN} + \text{NO}_2 + \text{CH}_2\text{O} + \text{HO}_2$                                                                 | $8.916 \cdot 10^{-12}$               | $k$ for H-abstractions from SAR in MOM by a secondary and a tertiary carbon bearing a -OH group: $(8.42 \cdot 10^{-13} + 1.75 \cdot 10^{-12}) \cdot 3.44$ ; previous $\text{RONO}_2$ split into 50% MACRN + 50% MVKN                                |



Table S11: C6 oxidation

| reaction                                                                                                                                                            | rate coefficient                     | reference                                   |
|---------------------------------------------------------------------------------------------------------------------------------------------------------------------|--------------------------------------|---------------------------------------------|
| $\text{BENZ} + \text{OH} \longrightarrow 0.53 \cdot \text{PHENOL} + 0.12 \cdot \text{BEPOMUC} + 0.65 \cdot \text{HO}_2 + 0.35 \cdot \text{BENZO}_2$                 | $2.300 \cdot 10^{-12} \exp(-193./T)$ |                                             |
| $\text{PHENOL} + \text{OH} \longrightarrow 0.14 \cdot \text{PHENO}_2 + 0.8 \cdot \text{HO}_2 + 0.8 \cdot \text{CATECHOL} + 0.06 \cdot \text{C}_6\text{H}_5\text{O}$ | $4.700 \cdot 10^{-13} \exp(1220./T)$ |                                             |
| $\text{PHENOL} + \text{NO}_3 \longrightarrow 0.26 \cdot \text{PHENO}_2 + 0.74 \cdot \text{C}_6\text{H}_5\text{O} + 0.74 \cdot \text{HNO}_3$                         | $3.800 \cdot 10^{-12}$               | NPHEO2 approximated with PHENO <sub>2</sub> |
| $\text{PHENO}_2 + \text{NO} \longrightarrow \text{HO}_2 + 0.7 \cdot \text{GLYOXAL} + \text{NO}_2$                                                                   | $2.600 \cdot 10^{-12} \exp(365./T)$  |                                             |
| $\text{PHENO}_2 + \text{HO}_2 \longrightarrow \text{PHENOOH}$                                                                                                       | $7.500 \cdot 10^{-13} \exp(700./T)$  |                                             |
| $\text{PHENO}_2 + \text{CH}_3\text{O}_2 \longrightarrow 2 \cdot \text{HO}_2 + 0.7 \cdot \text{GLYOXAL} + \text{CH}_2\text{O}$                                       | $1.000 \cdot 10^{-12}$               |                                             |
| $\text{PHENO}_2 + \text{CH}_3\text{CO}_3 \longrightarrow \text{HO}_2 + 0.7 \cdot \text{GLYOXAL} + \text{CH}_3\text{O}_2 + \text{CO}_2$                              | $1.000 \cdot 10^{-11}$               |                                             |
| $\text{PHENOOH} + \text{OH} \longrightarrow \text{H}_2\text{O} + \text{PHENO}_2$                                                                                    | $3.800 \cdot 10^{-12} \exp(200./T)$  |                                             |
| $\text{C}_6\text{H}_5\text{O} + \text{NO}_2 \longrightarrow$                                                                                                        | $2.100 \cdot 10^{-12}$               |                                             |
| $\text{C}_6\text{H}_5\text{O} + \text{O}_3 \longrightarrow \text{C}_6\text{H}_5\text{O}_2$                                                                          | $2.800 \cdot 10^{-13}$               |                                             |
| $\text{C}_6\text{H}_5\text{O}_2 + \text{NO} \longrightarrow \text{C}_6\text{H}_5\text{O} + \text{NO}_2$                                                             | $2.600 \cdot 10^{-12} \exp(365./T)$  |                                             |
| $\text{C}_6\text{H}_5\text{O}_2 + \text{NO}_3 \longrightarrow \text{C}_6\text{H}_5\text{O} + \text{NO}_2$                                                           | $2.300 \cdot 10^{-12}$               | MCM3.2                                      |
| $\text{C}_6\text{H}_5\text{O}_2 + \text{HO}_2 \longrightarrow \text{C}_6\text{H}_5\text{OOH}$                                                                       | $7.500 \cdot 10^{-13} \exp(700./T)$  |                                             |
| $\text{C}_6\text{H}_5\text{O}_2 + \text{CH}_3\text{O}_2 \longrightarrow \text{C}_6\text{H}_5\text{O} + \text{CH}_2\text{O} + \text{HO}_2$                           | $1.000 \cdot 10^{-12}$               |                                             |
| $\text{C}_6\text{H}_5\text{O}_2 + \text{CH}_3\text{CO}_3 \longrightarrow \text{C}_6\text{H}_5\text{O} + \text{CH}_3\text{O}_2 + \text{CO}_2$                        | $1.000 \cdot 10^{-11}$               |                                             |
| $\text{C}_6\text{H}_5\text{OOH} + \text{OH} \longrightarrow \text{C}_6\text{H}_5\text{O}_2$                                                                         | $3.800 \cdot 10^{-12} \exp(200./T)$  |                                             |
| $\text{BENZO}_2 + \text{NO} \longrightarrow \text{GLYOXAL} + \text{NO}_2 + 0.5 \cdot \text{BIGALD}_1 + \text{HO}_2$                                                 | $2.600 \cdot 10^{-12} \exp(365./T)$  | MCM3.2                                      |
| $\text{BENZO}_2 + \text{HO}_2 \longrightarrow \text{BENZOOH}$                                                                                                       | $7.500 \cdot 10^{-13} \exp(700./T)$  |                                             |
| $\text{BENZO}_2 + \text{CH}_3\text{O}_2 \longrightarrow \text{GLYOXAL} + 0.5 \cdot \text{BIGALD}_1 + 2 \cdot \text{HO}_2 + \text{CH}_2\text{O}$                     | $1.000 \cdot 10^{-12}$               |                                             |
| $\text{BENZO}_2 + \text{CH}_3\text{CO}_3 \longrightarrow \text{GLYOXAL} + 0.5 \cdot \text{BIGALD}_1 + \text{HO}_2 + \text{CH}_3\text{O}_2 + \text{CO}_2$            | $1.000 \cdot 10^{-11}$               |                                             |
| $\text{BENZOOH} + \text{OH} \longrightarrow \text{BENZO}_2$                                                                                                         | $3.800 \cdot 10^{-12} \exp(200./T)$  |                                             |
| $\text{CATECHOL} + \text{OH} \longrightarrow \text{CATEC}_1\text{O}$                                                                                                | $1.000 \cdot 10^{-10}$               |                                             |
| $\text{CATECHOL} + \text{NO}_3 \longrightarrow \text{CATEC}_1\text{O} + \text{HNO}_3$                                                                               | $9.900 \cdot 10^{-11}$               |                                             |
| $\text{CATEC}_1\text{O} + \text{NO}_2 \longrightarrow$                                                                                                              | $2.100 \cdot 10^{-12}$               |                                             |
| $\text{CATEC}_1\text{O} + \text{O}_3 \longrightarrow \text{CATEC}_1\text{O}_2$                                                                                      | $2.800 \cdot 10^{-13}$               |                                             |
| $\text{CATEC}_1\text{O}_2 + \text{HO}_2 \longrightarrow \text{CATEC}_1\text{OOH}$                                                                                   | $7.500 \cdot 10^{-13} \exp(700./T)$  |                                             |
| $\text{CATEC}_1\text{O}_2 + \text{NO} \longrightarrow \text{CATEC}_1\text{O} + \text{NO}_2$                                                                         | $2.600 \cdot 10^{-12} \exp(365./T)$  |                                             |
| $\text{CATEC}_1\text{O}_2 + \text{NO}_3 \longrightarrow \text{CATEC}_1\text{O} + \text{NO}_2$                                                                       | $2.300 \cdot 10^{-12}$               | MCM3.2                                      |
| $\text{CATEC}_1\text{O}_2 + \text{CH}_3\text{O}_2 \longrightarrow \text{CATEC}_1\text{O} + \text{CH}_2\text{O} + \text{HO}_2$                                       | $1.000 \cdot 10^{-12}$               |                                             |
| $\text{CATEC}_1\text{O}_2 + \text{CH}_3\text{CO}_3 \longrightarrow \text{CATEC}_1\text{OCH}_3\text{O}_2 + \text{CO}_2$                                              | $1.000 \cdot 10^{-11}$               |                                             |
| $\text{CATEC}_1\text{OOH} + \text{OH} \longrightarrow \text{CATEC}_1\text{O}_2$                                                                                     | $1.900 \cdot 10^{-12} \exp(190./T)$  |                                             |

Table S12: C7 oxidation

| reaction                                                                                                                                                                                                                                                      | rate coefficient                                                   | reference                                                                                                                                                          |
|---------------------------------------------------------------------------------------------------------------------------------------------------------------------------------------------------------------------------------------------------------------|--------------------------------------------------------------------|--------------------------------------------------------------------------------------------------------------------------------------------------------------------|
| $\text{TOL} + \text{OH} \longrightarrow 0.18 \cdot \text{CRESOL} + 0.1 \cdot \text{TEPOMUC} + 0.07 \cdot \text{BZOO} + 0.65 \cdot \text{TOLO}_2 + 0.28 \cdot \text{HO}_2$                                                                                     | $1.700 \cdot 10^{-12} \exp(352./T)$                                |                                                                                                                                                                    |
| $\text{CRESOL} + \text{OH} \longrightarrow 0.2 \cdot \text{PHENO}_2 + 0.73 \cdot \text{HO}_2 + 0.73 \cdot \text{CATECHOL} + 0.07 \cdot \text{C}_6\text{H}_5\text{O}$                                                                                          | $4.700 \cdot 10^{-11}$                                             | CATECHOL and PHENO <sub>2</sub> omits one CH <sub>3</sub> group of MCATECHOL and CRESO <sub>2</sub>                                                                |
| $\text{CRESOL} + \text{NO}_3 \longrightarrow 0.61 \cdot \text{PHENO}_2 + 0.39 \cdot \text{C}_6\text{H}_5\text{O} + 0.49 \cdot \text{HNO}_3$                                                                                                                   | $1.400 \cdot 10^{-11}$                                             | CRESO <sub>2</sub> and NCRESO <sub>2</sub> approximated with PHENO <sub>2</sub> ; TOL <sub>1</sub> O with C <sub>6</sub> H <sub>5</sub> O (see MCM3.2 for details) |
| $\text{TOLO}_2 + \text{HO}_2 \longrightarrow \text{TOLOOH}$                                                                                                                                                                                                   | $7.500 \cdot 10^{-13} \exp(700./T)$                                |                                                                                                                                                                    |
| $\text{TOLO}_2 + \text{NO} \longrightarrow \text{NO}_2 + 0.6 \cdot \text{GLYOXAL} + 0.4 \cdot \text{CH}_3\text{COCHO} + \text{HO}_2 + 0.2 \cdot \text{BIGALD}_1 + 0.2 \cdot \text{BIGALD}_2 + 0.2 \cdot \text{BIGALD}_3$                                      | $2.600 \cdot 10^{-12} \exp(365./T)$                                |                                                                                                                                                                    |
| $\text{TOLO}_2 + \text{CH}_3\text{O}_2 \longrightarrow 0.6 \cdot \text{GLYOXAL} + 0.4 \cdot \text{CH}_3\text{COCHO} + 2 \cdot \text{HO}_2 + \text{CH}_2\text{O}$                                                                                              | $1.000 \cdot 10^{-12}$                                             |                                                                                                                                                                    |
| $\text{TOLO}_2 + \text{CH}_3\text{CO}_3 \longrightarrow 0.6 \cdot \text{GLYOXAL} + 0.4 \cdot \text{CH}_3\text{COCHO} + \text{HO}_2 + \text{CH}_3\text{O}_2 + \text{CO}_2 + 0.2 \cdot \text{BIGALD}_1 + 0.2 \cdot \text{BIGALD}_2 + 0.2 \cdot \text{BIGALD}_3$ | $1.000 \cdot 10^{-11}$                                             |                                                                                                                                                                    |
| $\text{TOLOOH} + \text{OH} \longrightarrow \text{TOLO}_2$                                                                                                                                                                                                     | $3.800 \cdot 10^{-12} \exp(200./T)$                                |                                                                                                                                                                    |
| $\text{BZOO} + \text{HO}_2 \longrightarrow \text{BZOOH}$                                                                                                                                                                                                      | $7.500 \cdot 10^{-13} \exp(700./T)$                                |                                                                                                                                                                    |
| $\text{BZOO} + \text{NO} \longrightarrow \text{BZALD} + \text{NO}_2 + \text{HO}_2$                                                                                                                                                                            | $2.600 \cdot 10^{-12} \exp(365./T)$                                | MCM3.2 forms 10% nitrate                                                                                                                                           |
| $\text{BZOO} + \text{CH}_3\text{O}_2 \longrightarrow \text{BZALD} + 2 \cdot \text{HO}_2 + \text{CH}_2\text{O}$                                                                                                                                                | $1.000 \cdot 10^{-12}$                                             |                                                                                                                                                                    |
| $\text{BZOO} + \text{CH}_3\text{CO}_3 \longrightarrow \text{BZALD} + \text{HO}_2 + \text{CH}_3\text{O}_2 + \text{CO}_2$                                                                                                                                       | $1.000 \cdot 10^{-11}$                                             |                                                                                                                                                                    |
| $\text{BZOOH} + \text{OH} \longrightarrow \text{BZOO}$                                                                                                                                                                                                        | $3.800 \cdot 10^{-12} \exp(200./T)$                                |                                                                                                                                                                    |
| $\text{BZALD} + \text{OH} \longrightarrow \text{ACBZO}_2$                                                                                                                                                                                                     | $5.900 \cdot 10^{-12} \exp(225./T)$                                |                                                                                                                                                                    |
| $\text{ACBZO}_2 + \text{NO}_2 + \text{M} \longrightarrow \text{M} + \text{PBZNIT}$                                                                                                                                                                            | $ktroe(2.700 \cdot 10^{-28}, 7.1, 1.200 \cdot 10^{-11}, 0.9, 0.6)$ | Orlando and Tyndall (2012) - Same as k(CH <sub>3</sub> CO <sub>3</sub> + NO <sub>2</sub> )                                                                         |
| $\text{PBZNIT} + \text{M} \longrightarrow \text{ACBZO}_2 + \text{NO}_2 + \text{M}$                                                                                                                                                                            |                                                                    |                                                                                                                                                                    |
| $\text{ACBZO}_2 + \text{NO} \longrightarrow \text{C}_6\text{H}_5\text{O}_2 + \text{NO}_2$                                                                                                                                                                     | $7.500 \cdot 10^{-12} \exp(290./T)$                                |                                                                                                                                                                    |
| $\text{ACBZO}_2 + \text{HO}_2 \longrightarrow 0.4 \cdot \text{C}_6\text{H}_5\text{O}_2 + 0.4 \cdot \text{OH}$                                                                                                                                                 | $4.300 \cdot 10^{-13} \exp(1040./T)$                               |                                                                                                                                                                    |
| $\text{ACBZO}_2 + \text{CH}_3\text{O}_2 \longrightarrow \text{C}_6\text{H}_5\text{O}_2 + \text{CH}_2\text{O} + \text{HO}_2$                                                                                                                                   | $1.000 \cdot 10^{-12}$                                             |                                                                                                                                                                    |
| $\text{ACBZO}_2 + \text{CH}_3\text{CO}_3 \longrightarrow \text{C}_6\text{H}_5\text{O}_2 + \text{CH}_3\text{O}_2 + \text{CO}_2$                                                                                                                                | $1.000 \cdot 10^{-11}$                                             |                                                                                                                                                                    |

Table S13: C8 oxidation

| reaction                                                                                                                                                                    | rate coefficient       | reference |
|-----------------------------------------------------------------------------------------------------------------------------------------------------------------------------|------------------------|-----------|
| $\text{XYL} + \text{OH} \longrightarrow 0.15 \cdot \text{XYLOL} + 0.23 \cdot \text{TEPOMUC} + 0.06 \cdot \text{BZOO} + 0.56 \cdot \text{XYLENO}_2 + 0.38 \cdot \text{HO}_2$ | $1.700 \cdot 10^{-11}$ |           |

Table S13: C8 oxidation (... continued)

| reaction                                                                                                                                                                                                                                                                                         | rate coefficient                    | reference                                                                                                                                              |
|--------------------------------------------------------------------------------------------------------------------------------------------------------------------------------------------------------------------------------------------------------------------------------------------------|-------------------------------------|--------------------------------------------------------------------------------------------------------------------------------------------------------|
| $\text{XYLOL} + \text{OH} \longrightarrow 0.3 \cdot \text{XYLOLO}_2 + 0.63 \cdot \text{HO}_2 + 0.63 \cdot \text{CATECHOL} + 0.07 \cdot \text{C}_6\text{H}_5\text{O}$                                                                                                                             | $8.400 \cdot 10^{-11}$              | CATECHOL omits two CH <sub>3</sub> groups of O-, M- and P-XYCATECH                                                                                     |
| $\text{XYLOL} + \text{NO}_3 \longrightarrow 0.61 \cdot \text{PHENO}_2 + 0.39 \cdot \text{C}_6\text{H}_5\text{O} + 0.49 \cdot \text{HNO}_3$                                                                                                                                                       | $3.200 \cdot 10^{-11}$              | XYLOLO <sub>2</sub> and NXYLOLO <sub>2</sub> approximated with PHENO <sub>2</sub> ; XY1O with C <sub>6</sub> H <sub>5</sub> O (see MCM3.2 for details) |
| $\text{XYLOLO}_2 + \text{NO} \longrightarrow \text{HO}_2 + \text{NO}_2 + 0.17 \cdot \text{GLYOXAL} + 0.51 \cdot \text{CH}_3\text{COCHO}$                                                                                                                                                         | $2.600 \cdot 10^{-12} \exp(365./T)$ |                                                                                                                                                        |
| $\text{XYLOLO}_2 + \text{HO}_2 \longrightarrow \text{XYLOLOOH}$                                                                                                                                                                                                                                  | $7.500 \cdot 10^{-13} \exp(700./T)$ |                                                                                                                                                        |
| $\text{XYLOLO}_2 + \text{CH}_3\text{O}_2 \longrightarrow 0.17 \cdot \text{GLYOXAL} + 0.51 \cdot \text{CH}_3\text{COCHO} + 2 \cdot \text{HO}_2 + \text{CH}_2\text{O}$                                                                                                                             | $1.000 \cdot 10^{-12}$              |                                                                                                                                                        |
| $\text{XYLOLO}_2 + \text{CH}_3\text{CO}_3 \longrightarrow \text{HO}_2 + 0.17 \cdot \text{GLYOXAL} + 0.51 \cdot \text{CH}_3\text{COCHO} + \text{CH}_3\text{O}_2 + \text{CO}_2$                                                                                                                    | $1.000 \cdot 10^{-11}$              |                                                                                                                                                        |
| $\text{XYLOLOOH} + \text{OH} \longrightarrow \text{XYLOLO}_2$                                                                                                                                                                                                                                    | $3.800 \cdot 10^{-12} \exp(200./T)$ |                                                                                                                                                        |
| $\text{XYLENO}_2 + \text{HO}_2 \longrightarrow \text{XYLENOOH}$                                                                                                                                                                                                                                  | $7.500 \cdot 10^{-13} \exp(700./T)$ |                                                                                                                                                        |
| $\text{XYLENO}_2 + \text{NO} \longrightarrow \text{HO}_2 + \text{NO}_2 + 0.34 \cdot \text{GLYOXAL} + 0.54 \cdot \text{CH}_3\text{COCHO} + 0.06 \cdot \text{BIGALD}_1 + 0.2 \cdot \text{BIGALD}_2 + 0.15 \cdot \text{BIGALD}_3 + 0.21 \cdot \text{BIGALD}_4$                                      | $2.600 \cdot 10^{-12} \exp(365./T)$ |                                                                                                                                                        |
| $\text{XYLENO}_2 + \text{CH}_3\text{O}_2 \longrightarrow 0.34 \cdot \text{GLYOXAL} + 0.54 \cdot \text{CH}_3\text{COCHO} + 2 \cdot \text{HO}_2 + \text{CH}_2\text{O} + 0.06 \cdot \text{BIGALD}_1 + 0.2 \cdot \text{BIGALD}_2 + 0.15 \cdot \text{BIGALD}_3 + 0.21 \cdot \text{BIGALD}_4$          | $1.000 \cdot 10^{-12}$              |                                                                                                                                                        |
| $\text{XYLENO}_2 + \text{CH}_3\text{CO}_3 \longrightarrow \text{HO}_2 + 0.34 \cdot \text{GLYOXAL} + 0.54 \cdot \text{CH}_3\text{COCHO} + 0.06 \cdot \text{BIGALD}_1 + 0.2 \cdot \text{BIGALD}_2 + 0.15 \cdot \text{BIGALD}_3 + 0.21 \cdot \text{BIGALD}_4 + \text{CH}_3\text{O}_2 + \text{CO}_2$ | $1.000 \cdot 10^{-11}$              |                                                                                                                                                        |
| $\text{XYLENOOH} + \text{OH} \longrightarrow \text{XYLENO}_2$                                                                                                                                                                                                                                    | $3.800 \cdot 10^{-12} \exp(200./T)$ |                                                                                                                                                        |

Table S14: C10/C15 oxidation (terpenes, sesqui-terpenes)

| reaction                                                                                                                                                                                                                                                                                                                                                                                                                                          | rate coefficient                     | reference                                                            |
|---------------------------------------------------------------------------------------------------------------------------------------------------------------------------------------------------------------------------------------------------------------------------------------------------------------------------------------------------------------------------------------------------------------------------------------------------|--------------------------------------|----------------------------------------------------------------------|
| $\text{APIN} + \text{OH} \longrightarrow \text{TERPO}_2$                                                                                                                                                                                                                                                                                                                                                                                          | $1.200 \cdot 10^{-11} \exp(440./T)$  |                                                                      |
| $\text{BPIN} + \text{OH} \longrightarrow \text{TERPO}_2$                                                                                                                                                                                                                                                                                                                                                                                          | $1.600 \cdot 10^{-11} \exp(470./T)$  |                                                                      |
| $\text{LIMON} + \text{OH} \longrightarrow \text{TERPO}_2$                                                                                                                                                                                                                                                                                                                                                                                         | $4.200 \cdot 10^{-11} \exp(400./T)$  |                                                                      |
| $\text{MYRC} + \text{OH} \longrightarrow \text{TERPO}_2$                                                                                                                                                                                                                                                                                                                                                                                          | $2.100 \cdot 10^{-10}$               |                                                                      |
| $\text{BCARY} + \text{OH} \longrightarrow \text{TERPO}_2$                                                                                                                                                                                                                                                                                                                                                                                         | $2.000 \cdot 10^{-10}$               |                                                                      |
| $\text{APIN} + \text{O}_3 \longrightarrow 0.07 \cdot \text{ELVOC} + 0.39 \cdot \text{TERPROD}_1 + 0.27 \cdot \text{TERPROD}_2 + 0.63 \cdot \text{OH} + 0.57 \cdot \text{HO}_2 + 0.23 \cdot \text{CO} + 0.27 \cdot \text{CO}_2 + 0.52 \cdot \text{CH}_3\text{COCH}_3 + 0.34 \cdot \text{CH}_2\text{O} + 0.05 \cdot \text{HCOOH} + 0.05 \cdot \text{BIGALKANE} + 0.06 \cdot \text{CH}_3\text{CO}_3 + 0.06 \cdot \text{CH}_3\text{COCH}_2\text{O}_2$ | $6.300 \cdot 10^{-16} \exp(-580./T)$ | 7% ELVOC-yield according to Ehn et al. (2014) for endocyclic alkenes |
| $\text{BPIN} + \text{O}_3 \longrightarrow 0.43 \cdot \text{TERPROD}_1 + 0.3 \cdot \text{TERPROD}_2 + 0.63 \cdot \text{OH} + 0.57 \cdot \text{HO}_2 + 0.23 \cdot \text{CO} + 0.27 \cdot \text{CO}_2 + 0.52 \cdot \text{CH}_3\text{COCH}_3 + 0.34 \cdot \text{CH}_2\text{O} + 0.05 \cdot \text{HCOOH} + 0.05 \cdot \text{BIGALKANE} + 0.06 \cdot \text{CH}_3\text{CO}_3 + 0.06 \cdot \text{CH}_3\text{COCH}_2\text{O}_2$                            | $1.700$<br>$10^{-15} \exp(-1300./T)$ | .                                                                    |

Table S14: C10/C15 oxidation (terpenes, sesqui-terpenes; ... continued)

| reaction                                                                                                                                                                                                                                                                                                                                                                                                                                           | rate coefficient                     | reference                                                                 |
|----------------------------------------------------------------------------------------------------------------------------------------------------------------------------------------------------------------------------------------------------------------------------------------------------------------------------------------------------------------------------------------------------------------------------------------------------|--------------------------------------|---------------------------------------------------------------------------|
| $\text{LIMON} + \text{O}_3 \longrightarrow 0.07 \cdot \text{ELVOC} + 0.39 \cdot \text{TERPROD}_1 + 0.27 \cdot \text{TERPROD}_2 + 0.63 \cdot \text{OH} + 0.57 \cdot \text{HO}_2 + 0.23 \cdot \text{CO} + 0.27 \cdot \text{CO}_2 + 0.52 \cdot \text{CH}_3\text{COCH}_3 + 0.34 \cdot \text{CH}_2\text{O} + 0.05 \cdot \text{HCOOH} + 0.05 \cdot \text{BIGALKANE} + 0.06 \cdot \text{CH}_3\text{CO}_3 + 0.06 \cdot \text{CH}_3\text{COCH}_2\text{O}_2$ | $3.000 \cdot 10^{-15} \exp(-780./T)$ | 7% ELVOC-yield according to Ehn et al. (2014) for endocyclic alkenes      |
| $\text{MYRC} + \text{O}_3 \longrightarrow 0.43 \cdot \text{TERPROD}_1 + 0.3 \cdot \text{TERPROD}_2 + 0.63 \cdot \text{OH} + 0.57 \cdot \text{HO}_2 + 0.23 \cdot \text{CO} + 0.27 \cdot \text{CO}_2 + 0.52 \cdot \text{CH}_3\text{COCH}_3 + 0.34 \cdot \text{CH}_2\text{O} + 0.05 \cdot \text{HCOOH} + 0.05 \cdot \text{BIGALKANE} + 0.06 \cdot \text{CH}_3\text{CO}_3 + 0.06 \cdot \text{CH}_3\text{COCH}_2\text{O}_2$                             | $4.700 \cdot 10^{-16}$               |                                                                           |
| $\text{BCARY} + \text{O}_3 \longrightarrow 0.645 \cdot \text{TERPROD}_1 + 0.45 \cdot \text{TERPROD}_2 + 0.63 \cdot \text{OH} + 0.57 \cdot \text{HO}_2 + 0.23 \cdot \text{CO} + 0.27 \cdot \text{CO}_2 + 0.52 \cdot \text{CH}_3\text{COCH}_3 + 0.34 \cdot \text{CH}_2\text{O} + 0.05 \cdot \text{HCOOH} + 0.05 \cdot \text{BIGALKANE} + 0.06 \cdot \text{CH}_3\text{CO}_3 + 0.06 \cdot \text{CH}_3\text{COCH}_2\text{O}_2$                          | $1.200 \cdot 10^{-14}$               |                                                                           |
| $\text{APIN} + \text{NO}_3 \longrightarrow \text{NTERPO}_2$                                                                                                                                                                                                                                                                                                                                                                                        | $1.200 \cdot 10^{-12} \exp(490./T)$  |                                                                           |
| $\text{BPIN} + \text{NO}_3 \longrightarrow \text{NTERPO}_2$                                                                                                                                                                                                                                                                                                                                                                                        | $2.500 \cdot 10^{-12}$               |                                                                           |
| $\text{LIMON} + \text{NO}_3 \longrightarrow \text{NTERPO}_2$                                                                                                                                                                                                                                                                                                                                                                                       | $1.100 \cdot 10^{-11}$               |                                                                           |
| $\text{MYRC} + \text{NO}_3 \longrightarrow \text{NTERPO}_2$                                                                                                                                                                                                                                                                                                                                                                                        | $1.200 \cdot 10^{-11}$               |                                                                           |
| $\text{BCARY} + \text{NO}_3 \longrightarrow \text{NTERPO}_2 + 0.5 \cdot \text{TERPROD}_1$                                                                                                                                                                                                                                                                                                                                                          | $1.900 \cdot 10^{-11}$               |                                                                           |
| $\text{TERPO}_2 + \text{NO} \longrightarrow 0.26 \cdot \text{TERPNO}_3 + 0.74 \cdot \text{NO}_2 + 0.36 \cdot \text{CH}_2\text{O} + 0.045 \cdot \text{CH}_3\text{COCH}_3 + 0.695 \cdot \text{TERPROD}_1 + 0.74 \cdot \text{HO}_2$                                                                                                                                                                                                                   | $4.200 \cdot 10^{-12} \exp(180./T)$  | alkyl nitrate yield according to Rindelaub et al. (2015) for alpha-pinene |
| $\text{TERPO}_2 + \text{HO}_2 \longrightarrow \text{TERPOOH}$                                                                                                                                                                                                                                                                                                                                                                                      | $7.500 \cdot 10^{-13} \exp(700./T)$  |                                                                           |
| $\text{TERPO}_2 + \text{CH}_3\text{O}_2 \longrightarrow 1.15 \cdot \text{CH}_2\text{O} + 0.05 \cdot \text{CH}_3\text{COCH}_3 + 0.945 \cdot \text{TERPROD}_1 + \text{HO}_2 + 0.25 \cdot \text{CH}_3\text{OH}$                                                                                                                                                                                                                                       | $2.000 \cdot 10^{-12} \exp(500./T)$  |                                                                           |
| $\text{TERPO}_2 + \text{CH}_3\text{CO}_3 \longrightarrow 0.4 \cdot \text{CH}_2\text{O} + 0.05 \cdot \text{CH}_3\text{COCH}_3 + 0.945 \cdot \text{TERPROD}_1 + \text{HO}_2 + \text{CH}_3\text{O}_2 + \text{CO}_2$                                                                                                                                                                                                                                   | $1.000 \cdot 10^{-11}$               |                                                                           |
| $\text{TERPOOH} + \text{OH} \longrightarrow \text{H}_2\text{O} + \text{TERPO}_2$                                                                                                                                                                                                                                                                                                                                                                   | $3.300 \cdot 10^{-11}$               |                                                                           |
| $\text{TERPROD}_1 + \text{OH} \longrightarrow \text{TERP}_2\text{O}_2$                                                                                                                                                                                                                                                                                                                                                                             | $5.700 \cdot 10^{-11}$               |                                                                           |
| $\text{TERPROD}_1 + \text{NO}_3 \longrightarrow 0.5 \cdot \text{TERP}_2\text{O}_2 + 0.5 \cdot \text{NTERPO}_2 + 0.5 \cdot \text{NO}_2$                                                                                                                                                                                                                                                                                                             | $1.000 \cdot 10^{-12}$               |                                                                           |
| $\text{TERPNO}_3 + \text{OH} \longrightarrow \text{NO}_2 + \text{TERPROD}_1 + \text{H}_2\text{O}$                                                                                                                                                                                                                                                                                                                                                  | $3.500 \cdot 10^{-12}$               |                                                                           |
| $\text{TERP}_2\text{O}_2 + \text{NO} \longrightarrow 0.1 \cdot \text{TERPNO}_3 + 0.9 \cdot \text{NO}_2 + 0.34 \cdot \text{CH}_2\text{O} + 0.27 \cdot \text{CH}_3\text{COCH}_3 + 0.225 \cdot \text{CO} + 0.9 \cdot \text{CO}_2 + 0.9 \cdot \text{TERPROD}_2 + 0.9 \cdot \text{HO}_2 + 0.225 \cdot \text{GLYALD}$                                                                                                                                    | $4.200 \cdot 10^{-12} \exp(180./T)$  |                                                                           |
| $\text{TERP}_2\text{O}_2 + \text{HO}_2 \longrightarrow \text{TERP}_2\text{OOH}$                                                                                                                                                                                                                                                                                                                                                                    | $7.500 \cdot 10^{-13} \exp(700./T)$  |                                                                           |
| $\text{TERP}_2\text{O}_2 + \text{CH}_3\text{O}_2 \longrightarrow \text{TERPROD}_2 + 0.93 \cdot \text{CH}_2\text{O} + 0.25 \cdot \text{CH}_3\text{OH} + \text{HO}_2 + 0.5 \cdot \text{CO}_2 + 0.125 \cdot \text{CO} + 0.125 \cdot \text{GLYALD} + 0.15 \cdot \text{CH}_3\text{COCH}_3$                                                                                                                                                              | $2.000 \cdot 10^{-12} \exp(500./T)$  |                                                                           |
| $\text{TERP}_2\text{O}_2 + \text{CH}_3\text{CO}_3 \longrightarrow 0.34 \cdot \text{CH}_2\text{O} + 0.27 \cdot \text{CH}_3\text{COCH}_3 + 0.225 \cdot \text{CO} + 2 \cdot \text{CO}_2 + \text{TERPROD}_2 + \text{HO}_2 + 0.225 \cdot \text{GLYALD} + \text{CH}_3\text{O}_2$                                                                                                                                                                         | $1.000 \cdot 10^{-11}$               |                                                                           |
| $\text{TERP}_2\text{OOH} + \text{OH} \longrightarrow \text{H}_2\text{O} + \text{TERP}_2\text{O}_2$                                                                                                                                                                                                                                                                                                                                                 | $2.300 \cdot 10^{-11}$               |                                                                           |

Table S14: C10/C15 oxidation (terpenes, sesqui-terpenes; ... continued)

| reaction                                                                                                                                                                                                                                                                     | rate coefficient                    | reference                                                                 |
|------------------------------------------------------------------------------------------------------------------------------------------------------------------------------------------------------------------------------------------------------------------------------|-------------------------------------|---------------------------------------------------------------------------|
| TERPROD <sub>2</sub> + OH $\longrightarrow$ 0.15 · CH <sub>3</sub> COCH <sub>2</sub> O <sub>2</sub> + 0.68 · CH <sub>2</sub> O + 1.8 · CO <sub>2</sub> + 0.5 · CH <sub>3</sub> COCH <sub>3</sub> + 0.65 · CH <sub>3</sub> CO <sub>3</sub> + 0.2 · HO <sub>2</sub> + 0.7 · CO | $3.400 \cdot 10^{-11}$              |                                                                           |
| NTERPO <sub>2</sub> + NO $\longrightarrow$ 0.26 · NTERPNO <sub>3</sub> + 1.48 · NO <sub>2</sub> + 0.74 · TERPROD <sub>1</sub>                                                                                                                                                | $4.200 \cdot 10^{-12} \exp(180./T)$ | alkyl nitrate yield according to Rindelaub et al. (2015) for alpha-pinene |
| NTERPO <sub>2</sub> + HO <sub>2</sub> $\longrightarrow$ NTERPNO <sub>3</sub>                                                                                                                                                                                                 | $7.500 \cdot 10^{-13} \exp(700./T)$ |                                                                           |
| NTERPO <sub>2</sub> + CH <sub>3</sub> O <sub>2</sub> $\longrightarrow$ 0.5 · NTERPNO <sub>3</sub> + 0.75 · CH <sub>2</sub> O + 0.25 · CH <sub>3</sub> OH + 0.5 · HO <sub>2</sub> + 0.5 · TERPROD <sub>1</sub> + 0.5 · NO <sub>2</sub>                                        | $2.000 \cdot 10^{-12} \exp(500./T)$ |                                                                           |
| NTERPO <sub>2</sub> + CH <sub>3</sub> CO <sub>3</sub> $\longrightarrow$ CH <sub>3</sub> O <sub>2</sub> + TERPROD <sub>1</sub> + CO <sub>2</sub> + NO <sub>2</sub>                                                                                                            | $1.000 \cdot 10^{-11}$              |                                                                           |
| NTERPO <sub>2</sub> + NO <sub>3</sub> $\longrightarrow$ 2 · NO <sub>2</sub> + TERPROD <sub>1</sub>                                                                                                                                                                           | $2.400 \cdot 10^{-12}$              |                                                                           |
| NTERPNO <sub>3</sub> + OH $\longrightarrow$ NO <sub>2</sub> + TERPROD <sub>1</sub> + H <sub>2</sub> O                                                                                                                                                                        | $3.500 \cdot 10^{-12}$              |                                                                           |
| ELVOC + OH $\longrightarrow$ HO <sub>2</sub> + TERPROD <sub>1</sub>                                                                                                                                                                                                          | $1.000 \cdot 10^{-11}$              | a general rate coefficient for oxygenated VOC                             |

Table S15: Tropospheric halogen + organics reactions

| reaction                                                                                                                                      | rate coefficient                                                   | reference                                                                                                                              |
|-----------------------------------------------------------------------------------------------------------------------------------------------|--------------------------------------------------------------------|----------------------------------------------------------------------------------------------------------------------------------------|
| CL + CH <sub>2</sub> O $\longrightarrow$ HCL + HO <sub>2</sub> + CO                                                                           | $8.100 \cdot 10^{-11} \exp(-30./T)$                                |                                                                                                                                        |
| CL + CH <sub>4</sub> $\longrightarrow$ CH <sub>3</sub> O <sub>2</sub> + HCL                                                                   | $7.300 \cdot 10^{-12} \exp(-1280./T)$                              |                                                                                                                                        |
| CL + CH <sub>3</sub> CN $\longrightarrow$ CH <sub>2</sub> O + HCL + CO + NO                                                                   | $1.600 \cdot 10^{-11} \exp(-2140./T)$                              | JPL (2011), products: Tyndall                                                                                                          |
| CL + C <sub>2</sub> H <sub>2</sub> + M $\longrightarrow$ 0.1 · CL + 0.1 · GLYOXAL + 0.9 · HCL + 0.9 · HO <sub>2</sub> + 1.8 · CO + M          | $ktroe(5.200 \cdot 10^{-30}, 2.4, 2.200 \cdot 10^{-10}, 0.7, 0.6)$ |                                                                                                                                        |
| CL + C <sub>2</sub> H <sub>4</sub> + M $\longrightarrow$ HO <sub>2</sub> + 2 · CO + HCL + M                                                   | $ktroe(1.600e-29, 3.3, 3.100 \cdot 10^{-10}, 1., 0.6)$             |                                                                                                                                        |
| CL + C <sub>2</sub> H <sub>6</sub> $\longrightarrow$ C <sub>2</sub> H <sub>5</sub> O <sub>2</sub> + HCL                                       | $7.200 \cdot 10^{-11} \exp(-70./T)$                                |                                                                                                                                        |
| CL + CH <sub>3</sub> O <sub>2</sub> $\longrightarrow$ 0.5 · CLO + 0.5 · CH <sub>2</sub> O + 0.5 · HCL + 0.5 · OH + 0.5 · CO + HO <sub>2</sub> | $1.600 \cdot 10^{-10}$                                             | 50% CH <sub>2</sub> OO is produced and assumed to be produced mostly in dry environments and thus decomposing                          |
| CL + CH <sub>3</sub> OH $\longrightarrow$ CH <sub>2</sub> O + HO <sub>2</sub> + HCL                                                           | $7.100 \cdot 10^{-11} \exp(-75./T)$                                | IUPAC (2008)                                                                                                                           |
| CL + CH <sub>3</sub> OOH $\longrightarrow$ CH <sub>2</sub> O + OH + HCL                                                                       | $5.900 \cdot 10^{-11}$                                             | IUPAC (2008)                                                                                                                           |
| CL + CH <sub>3</sub> CHO $\longrightarrow$ CH <sub>3</sub> CO <sub>3</sub> + HCL                                                              | $8.000 \cdot 10^{-11}$                                             | IUPAC (2008)                                                                                                                           |
| CL + GLYALD $\longrightarrow$ 0.35 · GLYOXAL + 0.35 · HO <sub>2</sub> + 0.65 · HOCH <sub>2</sub> CO <sub>3</sub> + HCL                        | $7.600 \cdot 10^{-11}$                                             | k by Bacher et al. (2001); products by Niki et al. (1987)                                                                              |
| CL + GLYOXAL $\longrightarrow$ HCL + HCOCO <sub>3</sub>                                                                                       | $3.441 \cdot 10^{-11}$                                             | k(298K) from Niki et al. (1985); k(CH <sub>2</sub> O + Cl) has been adjusted for the k(CH <sub>2</sub> O + Cl) by JPL (2011) used here |
| CL + C <sub>3</sub> H <sub>8</sub> $\longrightarrow$ C <sub>3</sub> H <sub>7</sub> O <sub>2</sub> + HCL                                       | $1.400 \cdot 10^{-10}$                                             | IUPAC (2008)                                                                                                                           |

Table S15: Tropospheric halogen + organics reactions (... continued)

| reaction                                                                                               | rate coefficient                     | reference                                                                                                                                        |
|--------------------------------------------------------------------------------------------------------|--------------------------------------|--------------------------------------------------------------------------------------------------------------------------------------------------|
| $\text{CL} + \text{CH}_3\text{COCH}_3 \longrightarrow \text{CH}_3\text{COCH}_2\text{O}_2 + \text{HCL}$ | $1.500 \cdot 10^{-11} \exp(-590./T)$ | IUPAC (2008)                                                                                                                                     |
| $\text{CL} + \text{HYAC} \longrightarrow \text{CH}_3\text{COCHO} + \text{HO}_2 + \text{HCL}$           | $5.400 \cdot 10^{-11}$               | Calvert et al. (2008a)                                                                                                                           |
| $\text{CL} + \text{BIGALKANE} \longrightarrow \text{ALKO}_2 + \text{HCL}$                              | $1.935e - 10$                        | from the reaction with OH, BIGALKANE seems to be methyl-butane whose k is an average of k given by Qian et al. (2002) and Anderson et al. (2007) |
| $\text{CL} + \text{MEK} \longrightarrow \text{HCL} + \text{MEKO}_2$                                    | $3.800 \cdot 10^{-11} \exp(16./T)$   | Calvert et al. (2008b)                                                                                                                           |
| $\text{CLO} + \text{CH}_3\text{O}_2 \longrightarrow \text{CL} + \text{HO}_2 + \text{CH}_2\text{O}$     | $3.300 \cdot 10^{-12} \exp(-115./T)$ |                                                                                                                                                  |
| $\text{BR} + \text{CH}_2\text{O} \longrightarrow \text{HBR} + \text{HO}_2 + \text{CO}$                 | $1.700 \cdot 10^{-11} \exp(-800./T)$ |                                                                                                                                                  |
| $\text{BR} + \text{CH}_3\text{CHO} \longrightarrow \text{CH}_3\text{CO}_3 + \text{HBR}$                | $1.800 \cdot 10^{-11} \exp(-460./T)$ | IUPAC (2008)                                                                                                                                     |
| $\text{BRO} + \text{CH}_3\text{O}_2 \longrightarrow \text{HOBR} + \text{OH} + \text{HO}_2 + \text{CO}$ | $2.420 \cdot 10^{-14} \exp(1617./T)$ | Shallcross et al. (2015); $\text{CH}_2\text{OO}$ assumed to be produced mostly in dry environments and thus decomposing                          |

Table S16: Sulfur reactions

| reaction                                                                                                                                                                           | rate coefficient                                                                                                     | reference  |
|------------------------------------------------------------------------------------------------------------------------------------------------------------------------------------|----------------------------------------------------------------------------------------------------------------------|------------|
| $\text{SO}_2 + \text{OH} + \text{M} \longrightarrow \text{H}_2\text{SO}_4 + \text{HO}_2$                                                                                           | $ktroe(3.300 \cdot 10^{-31}, 4.3, 1.600 \cdot 10^{-12}, 0., 0.6)$                                                    | JPL (2011) |
| $\text{DMS} + \text{OH} \longrightarrow \text{CH}_3\text{SO}_2 + \text{HCHO}$                                                                                                      | $1.130 \cdot 10^{-11} \exp(-253./T)$                                                                                 |            |
| $\text{DMS} + \text{OH} \longrightarrow \text{DMSO} + \text{HO}_2$                                                                                                                 | $1. \cdot 10^{-9} \exp(5820./T) \cdot [\text{O}_2] / (1. \cdot 10^{30} + 5. \cdot \exp(6280./T) \cdot [\text{O}_2])$ |            |
| $\text{DMS} + \text{NO}_3 \longrightarrow \text{CH}_3\text{SO}_2 + \text{HNO}_3 + \text{HCHO}$                                                                                     | $1.900 \cdot 10^{-13} \exp(520./T)$                                                                                  |            |
| $\text{DMS} + \text{CL} \longrightarrow \text{CH}_3\text{SO}_2 + \text{HCL} + \text{HCHO}$                                                                                         | $3.300 \cdot 10^{-10}$                                                                                               |            |
| $\text{DMS} + \text{BR} \longrightarrow \text{CH}_3\text{SO}_2 + \text{HBR} + \text{HCHO}$                                                                                         | $9.000 \cdot 10^{-11} \exp(-2386./T)$                                                                                |            |
| $\text{DMS} + \text{BRO} \longrightarrow \text{BR} + \text{DMSO}$                                                                                                                  | $4.400 \cdot 10^{-13}$                                                                                               |            |
| $\text{DMSO} + \text{OH} \longrightarrow 0.6 \cdot \text{SO}_2 + \text{HCHO} + 0.6 \cdot \text{CH}_3\text{O}_2 + 0.4 \cdot \text{HO}_2 + 0.4 \cdot \text{CH}_3\text{SO}_3\text{H}$ | $1.000 \cdot 10^{-10}$                                                                                               |            |
| $\text{CH}_3\text{SO}_2 \longrightarrow \text{CH}_3\text{O}_2 + \text{SO}_2$                                                                                                       | $1.800 \cdot 10^{13} \exp(-8661./T)$                                                                                 |            |
| $\text{CH}_3\text{SO}_2 + \text{O}_3 \longrightarrow \text{CH}_3\text{SO}_3$                                                                                                       | $3.000 \cdot 10^{-13}$                                                                                               |            |
| $\text{CH}_3\text{SO}_3 + \text{HO}_2 \longrightarrow \text{CH}_3\text{SO}_3\text{H}$                                                                                              | $5.000 \cdot 10^{-11}$                                                                                               |            |

Table S17: Stratospheric O(1D) reactions (... continued)

| reaction                                                                                                | rate coefficient                    | reference                                   |
|---------------------------------------------------------------------------------------------------------|-------------------------------------|---------------------------------------------|
| Table S17: Stratospheric O(1D) reactions                                                                |                                     |                                             |
| reaction                                                                                                | rate coefficient                    | reference                                   |
| $\text{O}_1\text{D} + \text{N}_2\text{O} \longrightarrow 2 \cdot \text{NO}$                             | $7.250 \cdot 10^{-11} \exp(20./T)$  |                                             |
| $\text{O}_1\text{D} + \text{N}_2\text{O} \longrightarrow \text{N}_2 + \text{O}_2$                       | $4.630 \cdot 10^{-11} \exp(20./T)$  |                                             |
| $\text{O}_1\text{D} + \text{O}_3 \longrightarrow 2 \cdot \text{O}_2$                                    | $1.200 \cdot 10^{-10}$              |                                             |
| $\text{O}_1\text{D} + \text{CFC}_{11} \longrightarrow 2 \cdot \text{CL} + \text{COFCL}$                 | $2.020 \cdot 10^{-10}$              |                                             |
| $\text{O}_1\text{D} + \text{CFC}_{12} \longrightarrow 2 \cdot \text{CL} + \text{COF}_2$                 | $1.204 \cdot 10^{-10}$              |                                             |
| $\text{O}_1\text{D} + \text{CFC}_{113} \longrightarrow 2 \cdot \text{CL} + \text{COFCL} + \text{COF}_2$ | $1.500 \cdot 10^{-10}$              |                                             |
| $\text{O}_1\text{D} + \text{CFC}_{114} \longrightarrow 2 \cdot \text{CL} + 2 \cdot \text{COF}_2$        | $9.750 \cdot 10^{-11}$              |                                             |
| $\text{O}_1\text{D} + \text{CFC}_{115} \longrightarrow \text{CL} + \text{F} + 2 \cdot \text{COF}_2$     | $1.500 \cdot 10^{-11}$              |                                             |
| $\text{O}_1\text{D} + \text{HCFC}_{22} \longrightarrow \text{CL} + \text{COF}_2$                        | $7.200 \cdot 10^{-11}$              |                                             |
| $\text{O}_1\text{D} + \text{HCFC}_{141}\text{B} \longrightarrow \text{CL} + \text{COFCL}$               | $1.794 \cdot 10^{-10}$              |                                             |
| $\text{O}_1\text{D} + \text{HCFC}_{142}\text{B} \longrightarrow \text{CL} + \text{COF}_2$               | $1.628 \cdot 10^{-10}$              |                                             |
| $\text{O}_1\text{D} + \text{CCL}_4 \longrightarrow 4 \cdot \text{CL}$                                   | $2.840 \cdot 10^{-10}$              |                                             |
| $\text{O}_1\text{D} + \text{CH}_3\text{BR} \longrightarrow \text{BR}$                                   | $1.674 \cdot 10^{-10}$              |                                             |
| $\text{O}_1\text{D} + \text{CF}_2\text{CLBR} \longrightarrow \text{BR} + \text{CL} + \text{COF}_2$      | $9.600 \cdot 10^{-11}$              |                                             |
| $\text{O}_1\text{D} + \text{CF}_3\text{BR} \longrightarrow \text{BR} + \text{F} + \text{COF}_2$         | $4.100 \cdot 10^{-11}$              |                                             |
| $\text{O}_1\text{D} + \text{H}_{1202} \longrightarrow 2 \cdot \text{BR} + \text{COF}_2$                 | $1.012 \cdot 10^{-10}$              |                                             |
| $\text{O}_1\text{D} + \text{H}_{2402} \longrightarrow 2 \cdot \text{BR} + 2 \cdot \text{COF}_2$         | $1.200 \cdot 10^{-10}$              |                                             |
| $\text{O}_1\text{D} + \text{CHBR}_3 \longrightarrow 3 \cdot \text{BR}$                                  | $4.490 \cdot 10^{-10}$              |                                             |
| $\text{O}_1\text{D} + \text{CH}_2\text{BR}_2 \longrightarrow 2 \cdot \text{BR}$                         | $2.570 \cdot 10^{-10}$              |                                             |
| $\text{O}_1\text{D} + \text{COF}_2 \longrightarrow 2 \cdot \text{F}$                                    | $2.140 \cdot 10^{-11}$              |                                             |
| $\text{O}_1\text{D} + \text{COFCL} \longrightarrow \text{CL} + \text{F}$                                | $1.900 \cdot 10^{-10}$              |                                             |
| $\text{O}_1\text{D} + \text{CH}_4 \longrightarrow \text{CH}_3\text{O}_2 + \text{OH}$                    | $1.310 \cdot 10^{-10}$              |                                             |
| $\text{O}_1\text{D} + \text{CH}_4 \longrightarrow \text{CH}_2\text{O} + \text{H} + \text{HO}_2$         | $3.500 \cdot 10^{-11}$              |                                             |
| $\text{O}_1\text{D} + \text{CH}_4 \longrightarrow \text{CH}_2\text{O} + \text{H}_2$                     | $9.000 \cdot 10^{-12}$              |                                             |
| $\text{O}_1\text{D} + \text{H}_2 \longrightarrow \text{H} + \text{OH}$                                  | $1.200 \cdot 10^{-10}$              |                                             |
| $\text{O}_1\text{D} + \text{HCL} \longrightarrow \text{CL} + \text{OH}$                                 | $1.500 \cdot 10^{-10}$              |                                             |
| $\text{O}_1\text{D} + \text{HBR} \longrightarrow \text{BR} + \text{OH}$                                 | $1.200 \cdot 10^{-10}$              |                                             |
| $\text{O}_1\text{D} + \text{HCN} \longrightarrow \text{CO} + \text{OH} + \text{NO}$                     | $7.700 \cdot 10^{-11} \exp(100./T)$ | Strekowski et al. (2001), products: Tyndall |

Table S18: Stratospheric inorganic halogen reactions

| reaction                                                                                                           | rate coefficient                                                   | reference                                                                                                     |
|--------------------------------------------------------------------------------------------------------------------|--------------------------------------------------------------------|---------------------------------------------------------------------------------------------------------------|
| $\text{CL} + \text{O}_3 \longrightarrow \text{CLO} + \text{O}_2$                                                   | $2.300 \cdot 10^{-11} \exp(-200./T)$                               |                                                                                                               |
| $\text{CL} + \text{H}_2 \longrightarrow \text{H} + \text{HCL}$                                                     | $3.050 \cdot 10^{-11} \exp(-2270./T)$                              |                                                                                                               |
| $\text{CL} + \text{H}_2\text{O}_2 \longrightarrow \text{HCL} + \text{HO}_2$                                        | $1.100 \cdot 10^{-11} \exp(-980./T)$                               |                                                                                                               |
| $\text{CL} + \text{HO}_2 \longrightarrow \text{HCL} + \text{O}_2$                                                  | $1.400 \cdot 10^{-11} \exp(270./T)$                                |                                                                                                               |
| $\text{CL} + \text{HO}_2 \longrightarrow \text{CLO} + \text{OH}$                                                   | $3.600 \cdot 10^{-11} \exp(-375./T)$                               |                                                                                                               |
| $\text{CL}_2\text{O}_2 + \text{M} \longrightarrow 2 \cdot \text{CLO} + \text{M}$                                   | $k_{\text{CL2O2}}$                                                 |                                                                                                               |
| $\text{CLO} + \text{O} \longrightarrow \text{CL} + \text{O}_2$                                                     | $2.800 \cdot 10^{-11} \exp(85./T)$                                 |                                                                                                               |
| $\text{CLO} + \text{OH} \longrightarrow \text{CL} + \text{HO}_2$                                                   | $7.400 \cdot 10^{-12} \exp(270./T)$                                |                                                                                                               |
| $\text{CLO} + \text{OH} \longrightarrow \text{HCL} + \text{O}_2$                                                   | $6.000 \cdot 10^{-13} \exp(230./T)$                                |                                                                                                               |
| $\text{CLO} + \text{HO}_2 \longrightarrow \text{HOCL} + \text{O}_2$                                                | $2.600 \cdot 10^{-12} \exp(290./T)$                                |                                                                                                               |
| $\text{CLO} + \text{NO} \longrightarrow \text{CL} + \text{NO}_2$                                                   | $6.400 \cdot 10^{-12} \exp(290./T)$                                |                                                                                                               |
| $\text{CLO} + \text{NO}_2 + \text{M} \longrightarrow \text{CLONO}_2 + \text{M}$                                    | $ktroe(1.800 \cdot 10^{-31}, 3.4, 1.500 \cdot 10^{-11}, 1.9, 0.6)$ |                                                                                                               |
| $\text{CLO} + \text{CLO} \longrightarrow 2 \cdot \text{CL} + \text{O}_2$                                           | $3.000 \cdot 10^{-11} \exp(-2450./T)$                              |                                                                                                               |
| $\text{CLO} + \text{CLO} \longrightarrow \text{CL}_2 + \text{O}_2$                                                 | $1.000 \cdot 10^{-12} \exp(-1590./T)$                              |                                                                                                               |
| $\text{CLO} + \text{CLO} \longrightarrow \text{CL} + \text{OCLO}$                                                  | $3.500 \cdot 10^{-13} \exp(-1370./T)$                              |                                                                                                               |
| $\text{CLO} + \text{CLO} + \text{M} \longrightarrow \text{CL}_2\text{O}_2 + \text{M}$                              | $ktroe(1.600 \cdot 10^{-32}, 4.5, 3.000 \cdot 10^{-12}, 2., 0.6)$  |                                                                                                               |
| $\text{HCL} + \text{OH} \longrightarrow \text{CL} + \text{H}_2\text{O}$                                            | $1.800 \cdot 10^{-12} \exp(-250./T)$                               |                                                                                                               |
| $\text{HCL} + \text{O} \longrightarrow \text{CL} + \text{OH}$                                                      | $1.000 \cdot 10^{-11} \exp(-3300./T)$                              |                                                                                                               |
| $\text{HOCL} + \text{O} \longrightarrow \text{CLO} + \text{OH}$                                                    | $1.700 \cdot 10^{-13}$                                             |                                                                                                               |
| $\text{HOCL} + \text{CL} \longrightarrow \text{CLO} + \text{HCL}$                                                  | $3.400 \cdot 10^{-12} \exp(-130./T)$                               |                                                                                                               |
| $\text{HOCL} + \text{OH} \longrightarrow \text{CLO} + \text{H}_2\text{O}$                                          | $3.000 \cdot 10^{-12} \exp(-500./T)$                               |                                                                                                               |
| $\text{CLONO}_2 + \text{O} \longrightarrow \text{CLO} + \text{NO}_3$                                               | $3.600 \cdot 10^{-12} \exp(-840./T)$                               |                                                                                                               |
| $\text{CLONO}_2 + \text{OH} \longrightarrow \text{HOCL} + \text{NO}_3$                                             | $1.200 \cdot 10^{-12} \exp(-330./T)$                               |                                                                                                               |
| $\text{CLONO}_2 + \text{CL} \longrightarrow \text{CL}_2 + \text{NO}_3$                                             | $6.500 \cdot 10^{-12} \exp(135./T)$                                |                                                                                                               |
| $\text{BR} + \text{O}_3 \longrightarrow \text{BRO} + \text{O}_2$                                                   | $1.600 \cdot 10^{-11} \exp(-780./T)$                               |                                                                                                               |
| $\text{BR} + \text{HO}_2 \longrightarrow \text{HBR} + \text{O}_2$                                                  | $4.800 \cdot 10^{-12} \exp(-310./T)$                               |                                                                                                               |
| $\text{BR} + \text{NO}_2 + \text{M} \longrightarrow 0.85 \cdot \text{BRONO} + 0.15 \cdot \text{BRNO}_2 + \text{M}$ | $ktroe(4.200 \cdot 10^{-31}, 2.4, 2.700 \cdot 10^{-11}, 0., 0.6)$  |                                                                                                               |
| $\text{BRONO} + \text{M} \longrightarrow \text{BR} + \text{NO}_2 + \text{M}$                                       | $1.648 \cdot 10^{11} \exp(-7399./T)$                               | fit to upper limit by Wine et al. (1993) and scaled 1.5 factor to match data by Orlando and Burkholder (2000) |
| $\text{BRO} + \text{O} \longrightarrow \text{BR} + \text{O}_2$                                                     | $1.900 \cdot 10^{-11} \exp(230./T)$                                |                                                                                                               |
| $\text{BRO} + \text{OH} \longrightarrow \text{BR} + \text{HO}_2$                                                   | $1.700 \cdot 10^{-11} \exp(250./T)$                                |                                                                                                               |
| $\text{BRO} + \text{HO}_2 \longrightarrow \text{HOBR} + \text{O}_2$                                                | $4.500 \cdot 10^{-12} \exp(460./T)$                                |                                                                                                               |



Table S18: Stratospheric inorganic halogen reactions (... continued)

| reaction                                                                        | rate coefficient                                                                | reference                                                                    |
|---------------------------------------------------------------------------------|---------------------------------------------------------------------------------|------------------------------------------------------------------------------|
| $\text{BRO} + \text{NO} \longrightarrow \text{BR} + \text{NO}_2$                | $8.800 \cdot 10^{-12} \exp(260./T)$                                             |                                                                              |
| $\text{BRO} + \text{NO}_2 + \text{M} \longrightarrow \text{BRONO}_2 + \text{M}$ | <i>ktroe</i> ( $5.200 \cdot 10^{-31}$ , 3.2, $6.900 \cdot 10^{-12}$ , 2.9, 0.6) |                                                                              |
| $\text{BRO} + \text{CLO} \longrightarrow \text{BR} + \text{OCLO}$               | $9.500 \cdot 10^{-13} \exp(550./T)$                                             |                                                                              |
| $\text{BRO} + \text{CLO} \longrightarrow \text{BR} + \text{CL} + \text{O}_2$    | $2.300 \cdot 10^{-12} \exp(260./T)$                                             |                                                                              |
| $\text{BRO} + \text{CLO} \longrightarrow \text{BRCL} + \text{O}_2$              | $4.100 \cdot 10^{-13} \exp(290./T)$                                             |                                                                              |
| $\text{BRO} + \text{BRO} \longrightarrow 2 \cdot \text{BR} + \text{O}_2$        | $2.400 \cdot 10^{-12} \exp(40./T)$                                              |                                                                              |
| $\text{BRO} + \text{BRO} \longrightarrow \text{BR}_2 + \text{O}_2$              | $2.800 \cdot 10^{-14} \exp(860./T)$                                             |                                                                              |
| $\text{HBR} + \text{OH} \longrightarrow \text{BR} + \text{H}_2\text{O}$         | $5.500 \cdot 10^{-12} \exp(200./T)$                                             |                                                                              |
| $\text{HBR} + \text{O} \longrightarrow \text{BR} + \text{OH}$                   | $5.800 \cdot 10^{-12} \exp(-1500./T)$                                           |                                                                              |
| $\text{HOBR} + \text{O} \longrightarrow \text{BRO} + \text{OH}$                 | $1.200 \cdot 10^{-10} \exp(-430./T)$                                            |                                                                              |
| $\text{BRONO}_2 + \text{O} \longrightarrow \text{BRO} + \text{NO}_3$            | $1.900 \cdot 10^{-11} \exp(215./T)$                                             |                                                                              |
| $\text{BRONO}_2 + \text{BR} \longrightarrow \text{BR}_2 + \text{NO}_3$          | $5.805 \cdot 10^{-11}$                                                          | Average of k at 298K by Orlando and Tyndall (1996) and Harwood et al. (1998) |
| $\text{BR}_2 + \text{OH} \longrightarrow \text{BR} + \text{HOBR}$               | $2.100 \cdot 10^{-11} \exp(240./T)$                                             |                                                                              |
| $\text{F} + \text{H}_2\text{O} \longrightarrow \text{HF} + \text{OH}$           | $1.400 \cdot 10^{-11}$                                                          |                                                                              |
| $\text{F} + \text{H}_2 \longrightarrow \text{H} + \text{HF}$                    | $1.400 \cdot 10^{-10} \exp(-500./T)$                                            |                                                                              |
| $\text{F} + \text{CH}_4 \longrightarrow \text{CH}_3\text{O}_2 + \text{HF}$      | $1.600 \cdot 10^{-10} \exp(-260./T)$                                            |                                                                              |
| $\text{F} + \text{HNO}_3 \longrightarrow \text{HF} + \text{NO}_3$               | $6.000 \cdot 10^{-12} \exp(400./T)$                                             |                                                                              |

Table S19: Stratospheric organic halogen reactions

| reaction                                                                                                     | rate coefficient                      | reference                                                                                                                      |
|--------------------------------------------------------------------------------------------------------------|---------------------------------------|--------------------------------------------------------------------------------------------------------------------------------|
| $\text{CH}_3\text{BR} + \text{OH} \longrightarrow \text{BR} + \text{H}_2\text{O} + \text{HO}_2$              | $2.350 \cdot 10^{-12} \exp(-1300./T)$ |                                                                                                                                |
| $\text{CH}_3\text{BR} + \text{CL} \longrightarrow \text{HCL} + \text{HO}_2 + \text{BR}$                      | $1.400 \cdot 10^{-11} \exp(-1030./T)$ |                                                                                                                                |
| $\text{CH}_2\text{BR}_2 + \text{OH} \longrightarrow 2 \cdot \text{BR} + \text{H}_2\text{O}$                  | $2.000 \cdot 10^{-12} \exp(-840./T)$  |                                                                                                                                |
| $\text{CHBR}_3 + \text{OH} \longrightarrow 3 \cdot \text{BR}$                                                | $1.350 \cdot 10^{-12} \exp(-600./T)$  |                                                                                                                                |
| $\text{CH}_2\text{BR}_2 + \text{CL} \longrightarrow 2 \cdot \text{BR} + \text{HCL}$                          | $6.300 \cdot 10^{-12} \exp(-800./T)$  |                                                                                                                                |
| $\text{CHBR}_3 + \text{CL} \longrightarrow 3 \cdot \text{BR} + \text{HCL}$                                   | $4.850 \cdot 10^{-12} \exp(-850./T)$  |                                                                                                                                |
| $\text{CH}_3\text{CL} + \text{CL} \longrightarrow \text{CO} + \text{HO}_2 + 2 \cdot \text{HCL}$              | $2.170 \cdot 10^{-11} \exp(-1130./T)$ |                                                                                                                                |
| $\text{CH}_3\text{CL} + \text{OH} \longrightarrow \text{CO} + \text{HO}_2 + \text{HCL} + \text{H}_2\text{O}$ | $2.400 \cdot 10^{-12} \exp(-1250./T)$ | products: Tyndall(p.c.), implicitly includes $\text{NO} \longrightarrow \text{NO}_2$ conversion with $\text{CH}_2\text{ClO}_2$ |
| $\text{CH}_3\text{CCL}_3 + \text{OH} \longrightarrow \text{H}_2\text{O} + 3 \cdot \text{CL}$                 | $1.640 \cdot 10^{-12} \exp(-1520./T)$ |                                                                                                                                |
| $\text{HCFC}_{22} + \text{OH} \longrightarrow \text{CL} + \text{H}_2\text{O} + \text{COF}_2$                 | $1.050 \cdot 10^{-12} \exp(-1600./T)$ |                                                                                                                                |
| $\text{HCFC}_{141}\text{B} + \text{OH} \longrightarrow \text{CL} + \text{COFCL}$                             | $1.250 \cdot 10^{-12} \exp(-1600./T)$ |                                                                                                                                |

Table S19: Stratospheric organic halogen reactions (... continued)

| reaction                                                                         | rate coefficient                      | reference |
|----------------------------------------------------------------------------------|---------------------------------------|-----------|
| $\text{HCFC}_{142}\text{B} + \text{OH} \longrightarrow \text{CL} + \text{COF}_2$ | $1.300 \cdot 10^{-12} \exp(-1770./T)$ |           |

Table S20: (Tropospheric) heterogeneous reactions

| reaction                                                     | reaction probability                    | reference              |
|--------------------------------------------------------------|-----------------------------------------|------------------------|
| $\text{O}_3 \longrightarrow \text{HO}_2$                     | $\gamma = 10^{-6}$                      | Stadtler et al. (2017) |
| $\text{HO}_2 \longrightarrow 0.5 \cdot \text{H}_2\text{O}_2$ | $\gamma = 0.2$                          | Stadtler et al. (2017) |
| $\text{NO}_3 \longrightarrow$                                | $\gamma = 0.001$                        | Stadtler et al. (2017) |
| $\text{NO}_2 \longrightarrow 0.5 \cdot \text{HONO}$          | $\gamma = 10^{-4}$                      | Stadtler et al. (2017) |
| $\text{HNO}_3 \longrightarrow$                               | $\gamma_{SS} = 0.01, \gamma_{DU} = 0.1$ | Stadtler et al. (2017) |
| $\text{N}_2\text{O}_5 \longrightarrow$                       | $\gamma = f(T, RH)$                     | Stadtler et al. (2017) |

Table S21: Stratospheric Sulfate aerosol reactions

| reaction                                                                    | reaction probability                               | reference              |
|-----------------------------------------------------------------------------|----------------------------------------------------|------------------------|
| $\text{N}_2\text{O}_5 \longrightarrow 2 \cdot \text{HNO}_3$                 | $\gamma = 0.04$                                    | Lamarque et al. (2012) |
| $\text{CLONO}_2 \longrightarrow \text{HOCL} + \text{HNO}_3$                 | $f(\text{sulfuricacidwt}\%)$                       | Lamarque et al. (2012) |
| $\text{BRONO}_2 \longrightarrow \text{HOBR} + \text{HNO}_3$                 | $f(T, P, HCl, \text{H}_2\text{O}, r)$              | Lamarque et al. (2012) |
| $\text{CLONO}_2 + \text{HCL} \longrightarrow \text{CL}_2 + \text{HNO}_3$    | $f(T, P, \text{H}_2\text{O}, r)$                   | Lamarque et al. (2012) |
| $\text{HOCL} + \text{HCL} \longrightarrow \text{CL}_2 + \text{H}_2\text{O}$ | $f(T, P, HCl, \text{H}_2\text{O}, r)$              | Lamarque et al. (2012) |
| $\text{HOBR} + \text{HCL} \longrightarrow \text{BRCL} + \text{H}_2\text{O}$ | $f(T, P, HCl, \text{HOBr}, \text{H}_2\text{O}, r)$ | Lamarque et al. (2012) |

Table S22: Stratospheric Nitric acid dihydrate reactions

| reaction                                                                    | reaction probability | reference              |
|-----------------------------------------------------------------------------|----------------------|------------------------|
| $\text{N}_2\text{O}_5 \longrightarrow 2 \cdot \text{HNO}_3$                 | $\gamma = 0.0004$    | Lamarque et al. (2012) |
| $\text{CLONO}_2 \longrightarrow \text{HOCL} + \text{HNO}_3$                 | $\gamma = 0.004$     | Lamarque et al. (2012) |
| $\text{CLONO}_2 + \text{HCL} \longrightarrow \text{CL}_2 + \text{HNO}_3$    | $\gamma = 0.2$       | Lamarque et al. (2012) |
| $\text{HOCL} + \text{HCL} \longrightarrow \text{CL}_2 + \text{H}_2\text{O}$ | $\gamma = 0.1$       | Lamarque et al. (2012) |
| $\text{BRONO}_2 \longrightarrow \text{HOBR} + \text{HNO}_3$                 | $\gamma = 0.3$       | Lamarque et al. (2012) |

Table S23: Stratospheric Ice aerosol reactions

| reaction                                                                    | reaction probability | reference              |
|-----------------------------------------------------------------------------|----------------------|------------------------|
| $\text{N}_2\text{O}_5 \longrightarrow 2 \cdot \text{HNO}_3$                 | $\gamma = 0.02$      | Lamarque et al. (2012) |
| $\text{CLONO}_2 \longrightarrow \text{HOCL} + \text{HNO}_3$                 | $\gamma = 0.3$       | Lamarque et al. (2012) |
| $\text{BRONO}_2 \longrightarrow \text{HOBR} + \text{HNO}_3$                 | $\gamma = 0.3$       | Lamarque et al. (2012) |
| $\text{CLONO}_2 + \text{HCL} \longrightarrow \text{CL}_2 + \text{HNO}_3$    | $\gamma = 0.3$       | Lamarque et al. (2012) |
| $\text{HOCL} + \text{HCL} \longrightarrow \text{CL}_2 + \text{H}_2\text{O}$ | $\gamma = 0.2$       | Lamarque et al. (2012) |
| $\text{HOBR} + \text{HCL} \longrightarrow \text{BRCL} + \text{H}_2\text{O}$ | $\gamma = 0.3$       | Lamarque et al. (2012) |

Table S24: Henry coefficients ( $H_0$  and temperature factor) and dry deposition reactivities for gas-phase species in ECHAM-HAMMOZ.

| Species                                        | H                            | Reactivity coefficient | Source                                                                                                                                                                                                                    |
|------------------------------------------------|------------------------------|------------------------|---------------------------------------------------------------------------------------------------------------------------------------------------------------------------------------------------------------------------|
| CO                                             | $9.81 \cdot 10^{-4}$ , 1720. | 0.                     | JPL (2011)                                                                                                                                                                                                                |
| H <sub>2</sub>                                 | $7.8 \cdot 10^{-4}$ , 500.   | 0.                     | Sander (1999)                                                                                                                                                                                                             |
| H <sub>2</sub> O <sub>2</sub>                  | $8.44 \cdot 10^4$ , 7600.    | 1                      | JPL (2011)                                                                                                                                                                                                                |
| HCN                                            | 12., 5000.                   | 1                      | Sander (1999)                                                                                                                                                                                                             |
| HNO <sub>3</sub>                               | $3.2 \cdot 10^{11}$ , 8700.  | 1                      | $H = 2.1 \cdot 10^5$ M/atm and $Ka = 15.4$ M (Schwartz and White, 1981). At an average cloud droplet pH=5 $\Rightarrow H^* = H \cdot (1 + Ka/[H+]) = 2.1 \cdot 10^5 \cdot (1 + 15.4/1 \cdot 10^{-5}) = 3.2 \cdot 10^{11}$ |
| HO <sub>2</sub>                                | 690., 0.                     | 1                      | JPL (2006)                                                                                                                                                                                                                |
| HO <sub>2</sub> NO <sub>2</sub>                | $1.2 \cdot 10^4$ , 6900.     | 1                      | Sander (1999)                                                                                                                                                                                                             |
| HONO                                           | $5.05 \cdot 10^3$ , 4800.    | 0.1                    | Sander (1999): $H=49$ and $Ka = 5.1 \cdot 10^{-4} \Rightarrow H^* = 49(1 + 5.1 \cdot 10^{-4} * 1 \cdot 10^7) = 5.05 \cdot 10^3$                                                                                           |
| N <sub>2</sub> O <sub>5</sub>                  | 2.1, 3400.                   | 1                      | Sander (1999): 2 ref. give it as infinite and one as 2.1 M/atm                                                                                                                                                            |
| N <sub>2</sub> O <sub>5</sub>                  | $3.2 \cdot 10^{11}$ , 8700.  | 1                      | HNO <sub>3</sub> as proxy as done in GEOS-Chem                                                                                                                                                                            |
| NH <sub>3</sub>                                | $1.02 \cdot 10^4$ , 4200.    | 0.                     | Sander (2015): $H(298) = 58$ M/atm and $H^*(298)$ calculated at pH=7 with $Kb = 1.75 \cdot 10^5$ M                                                                                                                        |
| NO                                             | $1.92 \cdot 10^{-3}$ , 1790. | 1                      | JPL (2006), comment                                                                                                                                                                                                       |
| NO <sub>2</sub>                                | $12. \cdot 10^{-2}$ , 2360.  | 1                      | JPL (2011)                                                                                                                                                                                                                |
| NO <sub>3</sub>                                | $3.8 \cdot 10^{-2}$ , 0.     | 1                      | JPL (2006)                                                                                                                                                                                                                |
| O <sub>3</sub>                                 | $1.03 \cdot 10^{-2}$ , 2830. | 1                      | JPL (2006)                                                                                                                                                                                                                |
| SO <sub>2</sub>                                | $2.45 \cdot 10^5$ , 3100.    | 0.                     | Sander (2015): $H(298) = 1.2$ M/atm and $H^*(298)$ calculated at pH=7 with $K1a = 1.23 \cdot 10^{-2}$ M and $K2a = 6.61 \cdot 10^{-8}$ M                                                                                  |
| H <sub>2</sub> SO <sub>4</sub>                 | $1.3 \cdot 10^{15}$ , 20000. | 0.                     | Sander (2015)                                                                                                                                                                                                             |
| CH <sub>4</sub>                                | $1.41 \cdot 10^{-3}$ , 2040. | 0.                     | JPL (2011)                                                                                                                                                                                                                |
| CH <sub>2</sub> O                              | $3.23 \cdot 10^3$ , 7100.    | 0.1                    | JPL (2011)                                                                                                                                                                                                                |
| CH <sub>3</sub> OH                             | 203., 5640.                  | 0.                     | JPL (2011)                                                                                                                                                                                                                |
| CH <sub>3</sub> OOH                            | 300., 5280.                  | 0.1                    | JPL (2011)                                                                                                                                                                                                                |
| HCOOH                                          | $8.9 \cdot 10^3$ , 6100.     | 0.                     | Sander (1999): measured value by Johnson et al. (1996)??, surface reactivity as in Nguyen et al. (2015)                                                                                                                   |
| CH <sub>3</sub> O <sub>2</sub> NO <sub>2</sub> | 2.0, 4700.                   | 0.1                    | Sander (1999): methyl nitrate as proxy species                                                                                                                                                                            |
| C <sub>2</sub> H <sub>5</sub> OH               | 190., 6660.                  | 0.                     | JPL (2011)                                                                                                                                                                                                                |
| C <sub>2</sub> H <sub>5</sub> OOH              | 336., 5995.                  | 1                      | JPL (2011)                                                                                                                                                                                                                |
| CH <sub>3</sub> CHO                            | 12.9, 5890.                  | 0.1                    | JPL (2011)                                                                                                                                                                                                                |
| CH <sub>3</sub> CN                             | 52.8, 3970.                  | 0.                     | JPL (2011)                                                                                                                                                                                                                |
| PAN                                            | 2.8, 5730.                   | 0.1                    | JPL (2011)                                                                                                                                                                                                                |
| CH <sub>3</sub> COOH                           | $4.1 \cdot 10^3$ , 6200.     | 0.                     | JPL (2011)                                                                                                                                                                                                                |

Table S24: Henry coefficients (... continued)

| Species                                          | H                         | Reactivity coefficient | Source                                     |
|--------------------------------------------------|---------------------------|------------------------|--------------------------------------------|
| CH <sub>3</sub> COOOH                            | 837., 5310.               | 0.1                    | JPL (2011)                                 |
| GLYALD                                           | $4.1 \cdot 10^4$ , 4600.  | 0.1                    | Sander (1999)                              |
| GLYOXAL                                          | $4.19 \cdot 10^5$ , 7480. | 0.1                    | JPL (2011)                                 |
| HCOCO <sub>2</sub> H                             | $1.1 \cdot 10^4$ , 4800.  | 0.1                    | Sander (2015)                              |
| HCOCO <sub>3</sub> H                             | $1.1 \cdot 10^4$ , 4800.  | 0.1                    | Sander (2015)                              |
| HOCH <sub>2</sub> CO <sub>2</sub> H              | $2.8 \cdot 10^4$ , 4000.  | 0.1                    | Sander (2015)                              |
| HOCH <sub>2</sub> CO <sub>3</sub> H              | $2.8 \cdot 10^4$ , 4000.  | 0.1                    | Sander (2015)                              |
| C <sub>3</sub> H <sub>7</sub> OOH                | 336., 5995.               | 1                      |                                            |
| CH <sub>3</sub> COCH <sub>3</sub>                | 27.8, 5530.               | 0.                     | JPL (2011)                                 |
| CH <sub>3</sub> COCHO                            | $3.7 \cdot 10^3$ , 7500.  | 0.1                    | Sander (1999)                              |
| HYAC                                             | $7.7 \cdot 10^3$ , 0.     | 0.1                    | Sander (2015)                              |
| NOA                                              | $1. \cdot 10^3$ , 0.      | 0.1                    | Sander (2015)                              |
| MACR                                             | 6.5, 5300.                | 0.1                    | Sander (1999)                              |
| MACROOH                                          | $2.1 \cdot 10^5$ , 9900.  | 1                      | Sander (2015)                              |
| MACROH                                           | $2.1 \cdot 10^5$ , 9900.  | 0.                     | Sander (2015)                              |
| MEK                                              | 37., 8200.                | 0.1                    | Sander (2015)                              |
| MEKOOH                                           | $1.1 \cdot 10^3$ , 7300.  | 1                      | Sander (2015)                              |
| MPAN                                             | 1.7, 0.                   | 0.1                    | Sander (1999)                              |
| MVK                                              | $4.1 \cdot 10^1$ , 7800.  | 0.1                    | Sander (1999)                              |
| MACO <sub>2</sub> H                              | $1.5 \cdot 10^3$ , 6800.  | 0.1                    | Sander (2015)                              |
| MACO <sub>3</sub> H                              | $1.5 \cdot 10^3$ , 6800.  | 1                      | Sander (2015)                              |
| BIGALD <sub>1</sub>                              | $2.5 \cdot 10^5$ , 0.     | 0.1                    | Sander (2015)                              |
| CO <sub>2</sub> H <sub>3</sub> CHO               | $4.1 \cdot 10^4$ , 4600.  | 0.1                    | Sander (1999)                              |
| CO <sub>2</sub> H <sub>3</sub> CO <sub>3</sub> H | $4.1 \cdot 10^4$ , 4600.  | 1                      | Sander (1999)                              |
| BIACETOH                                         | $4.1 \cdot 10^4$ , 4600.  | 0.1                    | Sander (1999)                              |
| IBUTALOH                                         | $4.1 \cdot 10^4$ , 4600.  | 0.1                    | Sander (1999)                              |
| IBUTALOHOOH                                      | $4.1 \cdot 10^4$ , 4600.  | 1                      | Sander (1999)                              |
| LHMKABOOH                                        | $2.1 \cdot 10^5$ , 9900.  | 1                      | Sander (2015)                              |
| MVKN                                             | $5. \cdot 10^3$ , 0.      | 0.1                    | like for ISOPNO3 from Nguyen et al. (2015) |
| MACRN                                            | $5. \cdot 10^3$ , 0.      | 0.1                    | like for ISOPNO3 from Nguyen et al. (2015) |
| MBO                                              | 64., 0.                   | 0.1                    | Sander (2015)                              |
| HPALD                                            | $4.1 \cdot 10^4$ , 4600.  | 1                      | Sander (1999)                              |
| PACALD                                           | $4.1 \cdot 10^4$ , 4600.  | 1                      | Sander (1999)                              |
| ISOPBNO <sub>3</sub>                             | $5. \cdot 10^3$ , 0.      | 0.1                    | Nguyen et al. (2015)                       |

Table S24: Henry coefficients (... continued)

| Species                              | H                        | Reactivity coefficient | Source               |
|--------------------------------------|--------------------------|------------------------|----------------------|
| ISOPDNO <sub>3</sub>                 | $5. \cdot 10^3$ , 0.     | 0.1                    | Nguyen et al. (2015) |
| LISOPACNO <sub>3</sub>               | $5. \cdot 10^3$ , 0.     | 0.1                    | Nguyen et al. (2015) |
| LC <sub>5</sub> PAN <sub>1719</sub>  | $5. \cdot 10^3$ , 0.     | 0.1                    | Nguyen et al. (2015) |
| LHC <sub>4</sub> ACCO <sub>2</sub> H | $2.1 \cdot 10^5$ , 9900. | 0.1                    | Sander (2015)        |
| LHC <sub>4</sub> ACCO <sub>3</sub> H | $2.1 \cdot 10^5$ , 9900. | 1                      | Sander (2015)        |
| LIECHO                               | $4.1 \cdot 10^4$ , 4600. | 0.1                    | Sander (1999)        |
| LIECO <sub>3</sub> H                 | $2.1 \cdot 10^5$ , 9900. | 1                      | Sander (2015)        |
| LIEPOX                               | $2.1 \cdot 10^5$ , 9900. | 1                      | Sander (2015)        |
| LNISOOH                              | $2.1 \cdot 10^5$ , 9900. | 1                      | Sander (2015)        |
| MBOOOH                               | $3. \cdot 10^{11}$ , 0.  | 1                      | Sander (2015)        |
| NC <sub>4</sub> CHO                  | 2.3, 0.                  | 0.1                    | Sander (2015)        |
| NISOPOOH                             | $3.6 \cdot 10^4$ , 0.    | 1                      | Sander (2015)        |
| LHC <sub>4</sub> ACCHO               | $4.1 \cdot 10^4$ , 4600. | 0.1                    | Sander (1999)        |
| HCOC <sub>5</sub>                    | $4.1 \cdot 10^4$ , 4600. | 1                      | Sander (1999)        |
| ISOPBOOH                             | $2.1 \cdot 10^5$ , 9900. | 1                      | Sander (2015)        |
| ISOPDOOH                             | $2.1 \cdot 10^5$ , 9900. | 1                      | Sander (2015)        |
| LISOPACOOH                           | $2.1 \cdot 10^5$ , 9900. | 1                      | Sander (2015)        |
| ISOPBOH                              | $2.1 \cdot 10^5$ , 9900. | 1                      | Sander (2015)        |
| ISOPDOH                              | $2.1 \cdot 10^5$ , 9900. | 1                      | Sander (2015)        |
| ISOPAOH                              | $2.1 \cdot 10^5$ , 9900. | 1                      | Sander (2015)        |
| LISOPOOHOOH                          | $2. \cdot 10^{16}$ , 0.  | 1                      | Sander (2015)        |
| LISOPNO <sub>3</sub> OOH             | $3. \cdot 10^{11}$ , 0.  | 1                      | Sander (2015)        |
| LISOPNO <sub>3</sub> NO <sub>3</sub> | $2.1 \cdot 10^5$ , 9900. | 1                      | Sander (2015)        |
| LC <sub>578</sub> OOH                | $3. \cdot 10^{11}$ , 0.  | 1                      | Sander (2015)        |
| C <sub>59</sub> OOH                  | $3. \cdot 10^{11}$ , 0.  | 1                      | Sander (2015)        |
| BIGALD <sub>2</sub>                  | $2.5 \cdot 10^5$ , 0.    | 0.1                    | Sander (2015)        |
| BIGALD <sub>3</sub>                  | $2.5 \cdot 10^5$ , 0.    | 0.1                    | Sander (2015)        |
| BZALD                                | 38., 5500.               | 0.1                    | Sander (2015)        |
| BZOOH                                | $2.9 \cdot 10^3$ , 0.    | 1                      | Sander (2015)        |
| PHENOOH                              | $3. \cdot 10^{11}$ , 0.  | 1                      | Sander (2015)        |
| C <sub>6</sub> H <sub>5</sub> OOH    | $3. \cdot 10^3$ , 5900.  | 1                      | Sander (2015)        |
| PHENOL                               | $3. \cdot 10^3$ , 5900.  | 0.1                    | Sander (2015)        |
| CATECHOL                             | $4.6 \cdot 10^3$ , 0.    | 0.1                    | Sander (2015)        |
| CATEC <sub>1</sub> OOH               | $4.6 \cdot 10^3$ , 0.    | 1                      | Sander (2015)        |

Table S24: Henry coefficients (... continued)

| Species               | H                           | Reactivity coefficient | Source                                                        |
|-----------------------|-----------------------------|------------------------|---------------------------------------------------------------|
| BEPOMUC               | $2.5 \cdot 10^5$ , 0.       | 0.1                    | Sander (2015)                                                 |
| BENZOOH               | $2.1 \cdot 10^5$ , 9900.    | 1                      | Sander (2015)                                                 |
| PBZNIT                | 2.8, 5730.                  | 0.1                    | PAN as proxy MCM3.2 name PBZN                                 |
| BIGALD <sub>4</sub>   | $2.5 \cdot 10^5$ , 0.       | 0.1                    | Sander (2015)                                                 |
| TOLOOH                | $2.1 \cdot 10^5$ , 9900.    | 1                      | Sander (2015)                                                 |
| CRESOL                | $1.1 \cdot 10^3$ , 6700.    | 0.1                    | Sander (2015)                                                 |
| TEPOMUC               | $2.5 \cdot 10^5$ , 0.       | 0.1                    | Sander (2015)                                                 |
| TERPROD <sub>2</sub>  | $2.5 \cdot 10^5$ , 0.       | 0.1                    | Sander (2015)                                                 |
| XYLENOOH              | $2.1 \cdot 10^5$ , 9900.    | 1                      | Sander (2015)                                                 |
| XYLOL                 | $1.1 \cdot 10^3$ , 6700.    | 0.1                    | cresol as proxy MCM3.2 name OXYLOL                            |
| XYLOLOOH              | $2.1 \cdot 10^5$ , 9900.    | 1                      | Sander (2015)                                                 |
| TERPOOH               | $2.1 \cdot 10^5$ , 9900.    | 1                      | Sander (2015)                                                 |
| TERP <sub>2</sub> OOH | $2.1 \cdot 10^5$ , 9900.    | 1                      | Sander (2015)                                                 |
| TERPNO <sub>3</sub>   | $5. \cdot 10^3$ , 0.        | 0.1                    | like an isoprene nitrate MCM3.2 name APINANO <sub>3</sub>     |
| TERPROD <sub>1</sub>  | $2.5 \cdot 10^5$ , 0.       | 1                      | Sander (2015)                                                 |
| NTERPNO <sub>3</sub>  | $5. \cdot 10^3$ , 0.        | 0.1                    | like an isoprene nitrate MCM3.2 name NAPINAOOH                |
| MTHOM                 | $2. \cdot 10^9$ , 0.        | 1                      | Sander (2015)                                                 |
| ALCOH                 | 336., 5995.                 | 0.1                    |                                                               |
| ALKOOH                | 336., 5995.                 | 1                      |                                                               |
| POOH                  | 300., 5280.                 | 0.1                    |                                                               |
| ROOH                  | 300., 5280.                 | 1                      |                                                               |
| EOOH                  | 300., 5280.                 | 0.1                    |                                                               |
| ALKNO <sub>3</sub>    | $5. \cdot 10^3$ , 0.        | 0.1                    | like for ISOPNO <sub>3</sub> from Nguyen et al. (2015) MCM3.2 |
| HF                    | $1.3 \cdot 10^4$ , 0.       | 0.                     | Sander (2015)                                                 |
| HCL                   | $2.0 \cdot 10^{11}$ , 600.  | 0.                     | Fernandez et al. (2014)                                       |
| HOCL                  | $6.6 \cdot 10^2$ , 5900.    | 0.                     | Sander (1999)                                                 |
| CL <sub>2</sub>       | $9.2 \cdot 10^{-2}$ , 2000. | 0.                     | Sander (1999)                                                 |
| CLONO <sub>2</sub>    | $2. \cdot 10^{13}$ , 0.     | 1                      | Sander (1999) : listed as "infinite"                          |
| BR <sub>2</sub>       | $7.2 \cdot 10^{-1}$ , 0.    | 0.                     | Sander (2015)                                                 |
| HBR                   | $7.2 \cdot 10^{13}$ , 6100. | 0.                     | Fernandez et al. (2014)                                       |
| HOBR                  | $6.1 \cdot 10^3$ , 0.       | 0.                     | Sander (1999)                                                 |
| BRONO <sub>2</sub>    | $2. \cdot 10^{13}$ , 0.     | 1                      | Sander (1999) : listed as "infinite"                          |
| BRONO                 | $3. \cdot 10^{-1}$ , 0.     | 0.                     | Sander (2015)                                                 |
| BRNO <sub>2</sub>     | $3. \cdot 10^{-1}$ , 0.     | 0.                     | Sander (2015)                                                 |

Table S24: Henry coefficients (... continued)

| Species                           | H                           | Reactivity<br>coefficient | Source               |
|-----------------------------------|-----------------------------|---------------------------|----------------------|
| BRCL                              | $9.7 \cdot 10^{-1}$ , 5600. | 0.                        | Sander (2015)        |
| DMS                               | 0.54, 3460.                 | 0.                        | JPL (2011)           |
| DMSO                              | $9.8 \cdot 10^4$ , 0.       | 0.1                       | JPL (2011)           |
| CH <sub>3</sub> SO <sub>3</sub> H | $1. \cdot 10^{30}$ , 0.     | 1                         | Jöckel et al. (2006) |



## References

- Anderson, J. L., Dixon, J. K., and Brennecke, J. F.: Solubility of CO<sub>2</sub>, CH<sub>4</sub>, C<sub>2</sub>H<sub>6</sub>, C<sub>2</sub>H<sub>4</sub>, O<sub>2</sub>, and N<sub>2</sub> in 1-Hexyl-3-methylpyridinium Bis(trifluoromethylsulfonyl)imide: Comparison to Other Ionic Liquids, *Accounts of Chemical Research*, 40, 1208–1216, doi:10.1021/ar7001649, PMID: 17970599, 2007.
- Bacher, C., Tyndall, G. S., and Orlando, J. J.: The Atmospheric Chemistry of Glycolaldehyde, *Journal of Atmospheric Chemistry*, 39, 171–189, doi:10.1023/A:1010689706869, 2001.
- Burkholder, J. and Orlando, J.: UV absorption cross-sections of cis-BrONO, *CHEMICAL PHYSICS LETTERS*, 317, 603–608, doi:10.1016/S0009-2614(99)01412-8, 2000.
- Calvert, J. G., Derwent, R. G., Orlando, J. J., Tyndall, G. S., and Wallington, T. J.: *Mechanisms of Atmospheric Oxidation of the Alkanes*, Oxford University Press, Oxford, UK, 2008a.
- Calvert, J. G., Mellouki, A., Orlando, J. J., Pilling, M., and Wallington, T. J.: *The Mechanisms of Atmospheric Oxidation of the Oxygenates*, Oxford University Press, Oxford, UK, 2008b.
- Crounse, J. D., Paulot, F., Kjaergaard, H. G., and Wennberg, P. O.: Peroxy radical isomerization in the oxidation of isoprene, *PHYSICAL CHEMISTRY CHEMICAL PHYSICS*, 13, 13 607–13 613, doi:10.1039/c1cp21330j, 2011.
- Crounse, J. D., Knap, H. C., Ornsø, K. B., Jorgensen, S., Paulot, F., Kjaergaard, H. G., and Wennberg, P. O.: Atmospheric Fate of Methacrolein. 1. Peroxy Radical Isomerization Following Addition of OH and O<sub>2</sub>, *JOURNAL OF PHYSICAL CHEMISTRY A*, 116, 5756–5762, doi:10.1021/jp211560u, 2012.
- Ehn, M., Thornton, J. A., Kleist, E., Sipila, M., Junninen, H., Pullinen, I., Springer, M., Rubach, F., Tillmann, R., Lee, B., Lopez-Hilfiker, F., Andres, S., Acir, I.-H., Rissanen, M., Jokinen, T., Schobesberger, S., Kangasluoma, J., Kontkanen, J., Nieminen, T., Kurten, T., Nielsen, L. B., Jorgensen, S., Kjaergaard, H. G., Canagaratna, M., Dal Maso, M., Berndt, T., Petaja, T., Wahner, A., Kerminen, V.-M., Kulmala, M., Worsnop, D. R., Wildt, J., and Mentel, T. F.: A large source of low-volatility secondary organic aerosol, *NATURE*, 506, 476+, doi:10.1038/nature13032, 2014.
- Fernandez, R. P., Salawitch, R. J., Kinnison, D. E., Lamarque, J.-F., and Saiz-Lopez, A.: Bromine partitioning in the tropical tropopause layer: implications for stratospheric injection, *Atmospheric Chemistry and Physics*, 14, 13 391–13 410, doi:10.5194/acp-14-13391-2014, 2014.
- Harwood, M., Burkholder, J., and Ravishankara, A.: Photodissociation of BrONO<sub>2</sub> and N<sub>2</sub>O<sub>5</sub>: Quantum yields for NO<sub>3</sub> production at 248, 308, and 352.5 nm, *JOURNAL OF PHYSICAL CHEMISTRY A*, 102, 1309–1317, doi:10.1021/jp9729829, 1998.
- IUPAC, Atkinson, R. and Baulch, D. L. and Cox, R. A. and Crowley, J. N. and Hampson, R. F. and Hynes, R. G. and Jenkin, M. E. and Rossi, M. J. and Troe, J.: Evaluated kinetic and photochemical data for atmospheric chemistry: Volume I - gas phase reactions of O<sub>x</sub>, HO<sub>x</sub>, NO<sub>x</sub> and SO<sub>x</sub> species, *Atmospheric Chemistry and Physics*, 4, 1461–1738, doi:10.5194/acp-4-1461-2004, 2004.
- IUPAC, Atkinson, R. and Baulch, D. L. and Cox, R. A. and Crowley, J. N. and Hampson, R. F. and Hynes, R. G. and Jenkin, M. E. and Rossi, M. J. and Troe, J. and IUPAC Subcommittee.: Evaluated kinetic and photochemical data for atmospheric chemistry: Volume II - gas phase reactions of organic species, *Atmospheric Chemistry and Physics*, 6, 3625–4055, doi:10.5194/acp-6-3625-2006, 2006.

- IUPAC, Atkinson, R. and Baulch, D. L. and Cox, R. A. and Crowley, J. N. and Hampson, R. F. and Hynes, R. G. and Jenkin, M. E. and Rossi, M. J. and Troe, J. and Wallington, T. J.: Evaluated kinetic and photochemical data for atmospheric chemistry: Volume IV gas phase reactions of organic halogen species, *Atmospheric Chemistry and Physics*, 8, 4141–4496, doi:10.5194/acp-8-4141-2008, 2008.
- Jöckel, P., Tost, H., Pozzer, A., Brühl, C., Buchholz, J., Ganzeveld, L., Hoor, P., Kerkweg, A., Lawrence, M., Sander, R., et al.: The atmospheric chemistry general circulation model ECHAM5/MESSy1: consistent simulation of ozone from the surface to the mesosphere, *Atmospheric Chemistry and Physics Discussions*, 6, 6957–7050, doi:10.5194/acp-6-5067-2006, 2006.
- Johnson, M., Kuwata, K., Wong, C., and Okumura, M.: Vibrational spectrum of I-(H<sub>2</sub>O), *CHEMICAL PHYSICS LETTERS*, 260, 551–557, doi:10.1016/0009-2614(96)00911-6, 1996.
- JPL, S. P. Sander and J. Abbatt and J. R. Barker and J. B. Burkholder and R. R. Friedl and D. M. Golden and R. E. Huie and C. E. Kolb and M. J. Kurylo and G. K. Moortgat and V. L. Orkin and P. H. Wine.: Chemical Kinetics and Photochemical Data for Use in Atmospheric Studies, Evaluation No. 17, JPL Publication 10-6, Jet Propulsion Laboratory, Pasadena, URL <http://jpldataeval.jpl.nasa.gov>, 2011.
- JPL, S. P. Sander and R. R. Friedl and D. M. Golden and M. J. Kurylo and G. K. Moortgat and H. Keller-Rudek and P. H. Wine and A. R. Ravishankara and C. E. Kolb and M. J. Molina and B. J. Finlayson-Pitts and R. E. Huie and V. L. Orkin.: Chemical Kinetics and Photochemical Data for Use in Atmospheric Studies, Evaluation Number 15, JPL Publication 06-2, Jet Propulsion Laboratory, Pasadena, CA, URL <http://jpldataeval.jpl.nasa.gov>, 2006.
- Lamarque, J. F., Emmons, L. K., Hess, P. G., Kinnison, D. E., Tilmes, S., Vitt, F., Heald, C. L., Holland, E. A., Lauritzen, P. H., Neu, J., Orlando, J. J., Rasch, P. J., and Tyndall, G. K.: CAM-chem: description and evaluation of interactive atmospheric chemistry in the Community Earth System Model, *Geoscientific Model Development*, 5, 369–411, doi:10.5194/gmd-5-369-2012, 2012.
- Müller, J.-F., Peeters, J., and Stavrakou, T.: Fast photolysis of carbonyl nitrates from isoprene, *Atmospheric Chemistry and Physics*, 14, 2497–2508, doi:10.5194/acp-14-2497-2014, 2014.
- Nguyen, T. L., Lee, H., Matthews, D. A., McCarthy, M. C., and Stanton, J. F.: Stabilization of the Simplest Criegee Intermediate from the Reaction between Ozone and Ethylene: A High-Level Quantum Chemical and Kinetic Analysis of Ozonolysis, *The Journal of Physical Chemistry A*, 119, 5524–5533, doi:10.1021/acs.jpca.5b02088, PMID: 25945650, 2015.
- Niki, H., Maker, P., Savage, C., and Breitenbach, L.: AN FTIR STUDY OF THE CL-ATOM-INITIATED REACTION OF GLYOXAL, *INTERNATIONAL JOURNAL OF CHEMICAL KINETICS*, 17, 547–558, doi:10.1002/kin.550170507, 1985.
- Niki, H., Maker, P., Savage, C., and Hurley, M.: FOURIER-TRANSFORM INFRARED STUDY OF THE KINETICS AND MECHANISMS FOR THE CL-ATOM-INITIATED AND HO-RADICAL-INITIATED OXIDATION OF GLYCOLALDEHYDE, *JOURNAL OF PHYSICAL CHEMISTRY*, 91, 2174–2178, doi:10.1021/j100292a038, 1987.
- Orlando, J. and Burkholder, J.: Identification of BrONO as the major product in the gas-phase reaction of Br with NO<sub>2</sub>, *JOURNAL OF PHYSICAL CHEMISTRY A*, 104, 2048–2053, doi:10.1021/jp993713g, 2000.
- Orlando, J., Tyndall, G., Bertman, S., Chen, W., and Burkholder, J.: Rate coefficient for the reaction of OH with CH<sub>2</sub>=C(CH<sub>3</sub>)C(O)OONO<sub>2</sub> (MPAN), *ATMOSPHERIC ENVIRONMENT*, 36, 1895–1900, doi:10.1016/S1352-2310(02)00090-0, 2002.

- Orlando, J. J. and Tyndall, G. S.: Rate coefficients for the thermal decomposition of  $\text{BrONO}_2$  and the heat of formation of  $\text{BrONO}_2$ , *J. Phys. Chem.*, 100, 19 398–19 405, 1996.
- Orlando, J. J. and Tyndall, G. S.: Laboratory studies of organic peroxy radical chemistry: an overview with emphasis on recent issues of atmospheric significance, *CHEMICAL SOCIETY REVIEWS*, 41, 6294–6317, doi:10.1039/c2cs35166h, 2012.
- Paulot, F., Crounse, J. D., Kjaergaard, H. G., Kurten, A., St Clair, J. M., Seinfeld, J. H., and Wennberg, P. O.: Unexpected Epoxide Formation in the Gas-Phase Photooxidation of Isoprene, *Science*, 325, 730–733, doi:10.1126/science.1172910, 2009.
- Peeters, J., Boullart, W., Pultau, V., Vandenberg, S., and Vereecken, L.: Structure-activity relationship for the addition of OH to (poly)alkenes: Site-specific and total rate constants, *JOURNAL OF PHYSICAL CHEMISTRY A*, 111, 1618–1631, doi:10.1021/jp066973o, 2007.
- Praske, E., Crounse, J. D., Bates, K. H., Kurten, T., Kjaergaard, H. G., and Wennberg, P. O.: Atmospheric Fate of Methyl Vinyl Ketone: Peroxy Radical Reactions with NO and HO<sub>2</sub>, *JOURNAL OF PHYSICAL CHEMISTRY A*, 119, 4562–4572, doi:10.1021/jp5107058, 2015.
- Qian, H.-B., Turton, D., Seakins, P. W., and Pilling, M. J.: A laser flash photolysis/IR diode laser absorption study of the reaction of chlorine atoms with selected alkanes, *International Journal of Chemical Kinetics*, 34, 86–94, doi:10.1002/kin.10025, 2002.
- Rindelaub, J. D., McAvey, K. M., and Shepson, P. B.: The photochemical production of organic nitrates from alpha-pinene and loss via acid-dependent particle phase hydrolysis, *ATMOSPHERIC ENVIRONMENT*, 100, 193–201, doi:10.1016/j.atmosenv.2014.10.010, 2015.
- Sander, R.: Modeling atmospheric chemistry: Interactions between gas-phase species and liquid cloud/aerosol particles, *SURVEYS IN GEOPHYSICS*, 20, 1–31, doi:10.1023/A:1006501706704, 1999.
- Sander, R.: Compilation of Henry’s law constants (version 4.0) for water as solvent, *ATMOSPHERIC CHEMISTRY AND PHYSICS*, 15, 4399–4981, doi:10.5194/acp-15-4399-2015, 2015.
- Schwartz, S. E. and White, W. H.: Solubility equilibria of the nitrogen oxides and oxyacids in dilute aqueous solution, in: *Advances in Environmental Science and Engineering*, edited by Pfafflin, J. R. and Ziegler, E. N., vol. 4, pp. 1–45, Gordon and Breach Science Publishers, NY, 1981.
- Shallcross, D. E., Leather, K. E., Bacak, A., Xiao, P., Lee, E. P. F., Ng, M., Mok, D. K. W., Dyke, J. M., Hossaini, R., Chipperfield, M. P., Khan, M. A. H., and Percival, C. J.: Reaction between  $\text{CH}_3\text{O}_2$  and BrO radicals: a new source of upper troposphere lower stratosphere hydroxyl radicals, *J. Phys. Chem. A*, 119, 4618–4632, 2015.
- St. Clair, J., Moon, S., Holbrook, W. S., Perron, J. T., Riebe, C. S., Martel, S. J., Carr, B., Harman, C., Singha, K., and Richter, D. d.: Geophysical imaging reveals topographic stress control of bedrock weathering, *Science*, 350, 534–538, doi:10.1126/science.aab2210, 2015.
- Stadtler, S., Simpson, D., Schröder, S., Taraborrelli, D., Bott, A., and Schultz, M.: Ozone Impacts of Gas-Aerosol Uptake in Global Chemistry Transport Models, *Atmos. Chem. Phys. Discuss.*, 2017, 1–35, doi:10.5194/acp-2017-566, URL <https://www.atmos-chem-phys-discuss.net/acp-2017-566/>, 2017.
- Strekowski, R., Nicovich, I., and Wine, P.: Kinetic and mechanistic study of the reaction of O(D-1) with  $\text{CF}_2\text{HBr}$ , *INTERNATIONAL JOURNAL OF CHEMICAL KINETICS*, 33, 262–270, doi:10.1002/kin.1019, 2001.

- Taraborrelli, D., Lawrence, M. G., Butler, T. M., Sander, R., and Lelieveld, J.: Mainz Isoprene Mechanism 2 (MIM2): an isoprene oxidation mechanism for regional and global atmospheric modelling, *Atmospheric Chemistry and Physics*, 9, 2751–2777, 2009.
- Wine, P. H., Nicovich, J. M., Stickel, R. E., Zhao, Z., Shackelford, C. J., Kreutter, K. D., Daykin, E. P., and Wang, S.: Halogen and Sulphur Reactions Relevant to Polar Chemistry, *The Tropospheric Chemistry of Ozone in the Polar Regions*, 1993.
